# Supplementary material for: Fine particulate matter source apportionment using a hybrid chemical transport and receptor model approach
Source: Copernicus journal article supplement (doi:10.5194/acp-14-5415-2014), 2014-06-04
Supplement: Supplementary file 1 [file acp-14-5415-2014-supplement.pdf]

Supplement of Atmos. Chem. Phys., 14, 5415–5431, 2014  
<http://www.atmos-chem-phys.net/acp-14-5415-2014/>  
doi:10.5194/acp-14-5415-2014-supplement  
© Author(s) 2014. CC Attribution 3.0 License.

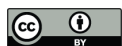

*Supplement of*

## **Fine particulate matter source apportionment using a hybrid chemical transport and receptor model approach**

**Y. Hu et al.**

*Correspondence to:* Y. Hu (yh29@mail.gatech.edu)

**Note S1** Using a newer version of CMAQ

**Note S2** Correction of organic and elemental carbon measurements at CSN sites

**Note S3** Ignoring higher order sensitivities

**Note S4** Regrouping the hybrid results

**Note S5** RM model applications for the comparison

**Table S1.** Performance evaluation of MM5-generated meteorological parameter fields compared to the Techniques Development Laboratory (TDL) surface observations.

**Table S2.** Source classification codes (SCCs) grouped in the 33 source categories.

**Table S3.** Performance evaluation of CMAQ modeled concentrations (initial predictions) compared to the AQS, SLAMS, CSN, IMPROVE and SEARCH observations.

**Table S4.** Measured species at CSN monitoring sites

**Table S5.** Composite PM<sub>2.5</sub> source composition profiles for the 33 categories

**Table S6.** Typical normalized prediction errors ( $\delta_i$ ) of CTM

**Table S7.** Brief information of the selected six CSN sites

**Table S8. (a)** Average daily a priori emissions estimates within a radius of approximate 54-km distance of Atlanta site (tons/day)

**Table S8. (b)** Average daily a priori emissions estimates within a radius of approximate 54-km distance of Chicago site (tons/day)

**Table S8. (c)** Average daily a priori emissions estimates within a radius of approximate 54-km distance of Detroit site (tons/day)

**Table S8. (d)** Average daily a priori emissions estimates within a radius of approximate 54-km distance of Los Angeles site (tons/day)

**Table S8. (e)** Average daily a priori emissions estimates within a radius of approximate 54-km distance of New York site (tons/day)

**Table S8. (f)** Average daily a priori emissions estimates within a radius of approximate 54-km distance of Pittsburgh site (tons/day)

**Table S9 (a)** Calculated  $R_j$  for each measurement day at Atlanta site

**Table S9. (b)** Calculated  $R_j$  for each measurement day at Chicago site

**Table S9. (c)** Calculated  $R_j$  for each measurement day at Detroit site

**Table S9. (d)** Calculated  $R_j$  for each measurement day at Los Angeles site

**Table S9. (e)** Calculated  $R_j$  for each measurement day at New York site

**Table S9. (f)** Calculated  $R_j$  for each measurement day at Pittsburgh site

**Table S10. (a)** Initial and refined source impacts in percentage contributions at Atlanta site

**Table S10. (b)** Initial and refined source impacts in percentage contributions at Chicago site

**Table S10. (c)** Initial and refined source impacts in percentage contributions at Detroit site

**Table S10. (d)** Initial and refined source impacts in percentage contributions at Los Angeles site

**Table S10. (e)** Initial and refined source impacts in percentage contributions at New York site

**Table S10. (f)** Initial and refined source impacts in percentage contributions at Pittsburgh site

**Table S11.** Initial and refined source impacts (%) regrouped to 9 sources and compared with CAMx/PSAT results (Burr and Zhang 2011b)

**Table S12.** January 2004 average initial and refined source impacts on  $PM_{2.5}$  at the six sites: regrouped to 13 sources

**Table S13.** Diesel versus gasoline vehicle impacts at the six sites.

**Table S14.** Primary versus secondary impacts at the six sites.

**Table S15.** Contribution to secondary species with refined source impacts results regrouped to 13 primary sources

**Fig. S1.** L-curve plot: objective function terms  $\chi_{R_j}^2$  versus  $\chi_{C_i}^2$  at different  $\Gamma$  values, calculated using the case of January 4, 2004 at the Atlanta CSN site.

**Fig. S2.** Objective function terms  $\chi_{C_i}^2$ ,  $\chi_{R_j}^2$  and  $\chi_{C_i}^2 + \chi_{R_j}^2$  against different  $\Gamma$  values calculated using the case of January 4, 2004 at the Atlanta CSN site.

**Fig. S3.** Cumulative distribution functions of calculated  $R_j$  across 164 CSN sites with valid measurements in January 2004, with source categories grouped by top tier sectors: (a) Biomass-burning, (b) Combustion, (c) Non-road and On-road, and (d) Industrial and Others.

**Fig. S4.** CMAQ modeling results using different versions: CMAQv4.5 versus CMAQv4.7.1 for DDM sensitivity of prescribed burn emissions to  $PM_{2.5}$  concentration ( $S_{PM25\_PB}$ ) scaled by simulated  $PM_{2.5}$  concentration ( $C_{PM2.5}$ ) at CSN sites.

**Note S1** Using a newer version of CMAQ

We are developing a hybrid method that aims to “correct” source-oriented-modeling-based (or “SM”)  $PM_{2.5}$  source apportionment results by using regularly available measurements (e.g., routine observations from monitoring networks). The hybrid method as expressed in our Eq. (12) can be applied to “correct” source apportionment results obtained from CMAQ with DDM as in this manuscript, CMAQ using other source apportionment approaches (including brute force methods), or other CTM-based methods. We are not developing a method that has to be attached to a specific CTM framework. Therefore the CTM-based results to be “corrected” can be from applications of a new CTM model with a recent emissions inventory or a “seasoned” but still widely used CTM with an extensively evaluated emissions inventory as in our case study. We used CMAQ because it is a widely used model, and v4.5 was chosen because it was the only version available that had DDM at the time the initial calculations were conducted. Since that time, a more recent version of CMAQ, v4.7.1, became available with DDM, and CMAQ v5.0.2 is expected to be released with DDM soon.

While CMAQ v4.6, v4.7, v4.7.1, v5.0 and v5.0.1 included theoretical improvements over v4.5 in many ways, the improvements in the ability to simulate  $PM_{2.5}$  and its components haven’t been substantial (Simon et al. 2012, Appel et. al. 2013), as suggested by the model performance evaluation of CMAQv5.0.1 in its application to the southeastern US (<http://semap.ce.gatech.edu/node/1835>). Additionally, of these newer CMAQ versions, DDM-3D is only available in v4.7.1. The implementation of DDM-3D and higher order DDM-3D for  $PM_{2.5}$  to CMAQ 5.0.2 is still ongoing.

We have rerun the model using v4.7.1 and re-assessed the impact on the prescribed burn sensitivities (which were chosen since they were one of the sources most adjusted and also contribute to SOA). The correlation ( $R^2$ ) in the calculated DDM sensitivities scaled by  $PM_{2.5}$  concentration between the two versions is 0.94 (see Fig. S4), which is larger than the correlation in simulated  $PM_{2.5}$  (0.86), and is much larger than the correlation between the simulated and observed  $PM_{2.5}$  obtained by using contemporary CTMs (e.g., Figure 8 of Simon et al. 2012 shows that most of the correlations were between approximately 0.2-0.5). Given that the sensitivities and simulated concentrations are both quite similar, and much more correlated than between the modeled concentrations and observations, the use of a different version in this application makes little difference. For these reasons, we do not believe that using v4.7.1 instead of v4.5 would have substantially impacted our results.

**Note S2** Correction of organic and elemental carbon measurements at CSN sites

Monthly, sampler type specific additive positive artifact  $a$  as well as multiplicative negative artifact  $m$  (see Malm et al. (2011) for details) are used. The majority of the CSN sites use Met One, Andersen and URG samplers. The measurements from other types of samplers such as various R&P samplers were removed from analysis due to no appropriate  $a$  and  $m$  available for them.

**Note S3** Ignoring higher order sensitivities

One could include higher order sensitivities in approximating source impact results, especially for sectors that contribute to nitrate and ammonium. In fact our hybrid

method, as designed, can add source impact portions estimated from using higher order sensitivities when they are available.

The first order DDM sensitivities usually don't exactly add up to the predicted total PM<sub>2.5</sub> concentrations due to ignoring the higher order sensitivities. However, among the 932 cases we have tested with our hybrid method, only 125 cases (13.4%) had a larger than 30% difference. We have done the analysis of our hybrid method application both with and without these cases (out of one-month long measurements at 164 CSN sites), and found that the changes are small.

Both Burr and Zhang (2011) and Koo et al. (2009) have found that the sum of BFM estimated source contributions will not equal the simulated base case concentrations either. On the other hand, Koo et al. (2009) have shown that first order DDM gave reasonably good predictions for impacts of SOA precursors, primary aerosols and on-road mobile source emissions. Their results in Figures 4, 6 and 7 also show that first-order DDM compared reasonably well with BFM for 100% reductions at apportioning sulfate, nitrate and ammonium to sources emitting SO<sub>2</sub>, NO<sub>x</sub> and NH<sub>3</sub> in winter times, with the nitrate estimation being slightly worse. They have also shown that first-order DDM performs well in determining the impact of sources that have indirect effects, such as the motor vehicle emissions that include multiple pollutants.

First order DDM sensitivities best approximate a small perturbation in a linear system. Note that our first-order DDM sensitivities were calculated for all emitted compounds from the sources, and this process utilized the DDM's proven advantage of capturing indirect effects. Also, we have split the total emissions into 33 sectors, which made the emissions of most sectors constitute a small fraction of total emissions. This

further diminishes the disadvantage of first-order DDM not capturing well the impacts from large changes of emissions. The hybrid method is designed to improve on an imperfect CTM-based source impact estimation method (no method is perfect on source apportionment), though we only showed the improvement with a DDM-sensitivity-based source impact estimation method here.

**Note S4** Regrouping the hybrid results

First, we split the secondary contributions from primary contributions for each of the 33 sources, using source specific composition profiles. Then we merged the primary portions of 33 sources into the 13 reduced sources. Finally we merged the secondary portions correspondingly into ammonium sulfates, ammonium nitrate, and secondary organic carbon. This regrouping made the hybrid method results directly comparable to those of RM methods.

**Note S5** RM model applications for the comparison

The Atlanta CSN site (130890002) is located in South Dekalb in Atlanta, near an interstate highway, not far away (~10 km) from the Hartsfield-Jackson Atlanta International Airport, one of the “busiest” airports in the world. The CMB-LGO method was conducted with the 8 source profiles (5 primary and 3 secondary) used by Balachandran et al. (2012). The Chicago site (170310076) is located in Lawndale, a residential community on the southwest side of Chicago. The CMB results that were resolved for 8 sources (no split between gasoline and diesel vehicles) from Rizzo and Scheff (2007) used measurement data composites from this site and another nearby CSN



site at Springfield, with twice as many samples coming from this site than the other site. The Detroit site (261630001) is located in Allen Park, a populated area southwest of the Detroit industrial center. Gildemeister et al. (2007) used PMF method at this site and resolved 8 sources (factors), including metal processing and road salts. The Los Angeles site (060658001) is located in Rubidoux of Riverside County in a suburban residential area, downwind of downtown Los Angeles. Pham et al. (2008) used CMB with 10 source profiles including profiles for cooking process, residual oil burning and sea salt. The OC measurements were not used in the CMB modeling because they were believed to be highly biased. The New York site (360050083) is located in the middle of the Bronx, a heavily populated urban area. Coutant et al. (2003) used PMF at this site and resolved 7 sources, including fuel oil burning. The Pittsburgh site (420030008) is located in Lawrenceville, an urban residential site, downwind from the Pittsburgh downtown. Maranche (2006) used PMF at this site and resolved 11 sources (factors). We chose to aggregate the 11 sources to 7 sources due to the non-distinctiveness of some of the original 11 sources.

**Table S1.** Performance evaluation of MM5-generated meteorological parameter fields compared to the Techniques Development Laboratory (TDL) surface observations.

| Wind speed (m/s) |       |      | Wind direction (deg) |      |             | Air temperature (K) |       |      | Humidity (g/kg) |      |             |
|------------------|-------|------|----------------------|------|-------------|---------------------|-------|------|-----------------|------|-------------|
| Mean             | Bias  | RMSE | Mean                 | Bias | Gross error | Mean                | Bias  | RMSE | Mean            | Bias | Gross error |
| OBS              |       |      | OBS                  |      |             | OBS                 |       |      | OBS             |      |             |
| 3.72             | -0.01 | 2.02 | 261.25               | 2.56 | 25.98       | 270.63              | -0.79 | 3.23 | 3.33            | 0.01 | 0.52        |

\*RMSE: Root mean square error.

**Table S2.** Source classification codes (SCCs) grouped in the 33 source categories.

| Category        | SCCs included (with leading digits)                                                                                                                                                                                                                                                                                                                                                                                                                                                                                                                                                                                                                                                                                                                                                                                                                                                                                   | Source Inventory                                                                              | Emission Uncertainty | $\sigma_{\ln R_j}$ |
|-----------------|-----------------------------------------------------------------------------------------------------------------------------------------------------------------------------------------------------------------------------------------------------------------------------------------------------------------------------------------------------------------------------------------------------------------------------------------------------------------------------------------------------------------------------------------------------------------------------------------------------------------------------------------------------------------------------------------------------------------------------------------------------------------------------------------------------------------------------------------------------------------------------------------------------------------------|-----------------------------------------------------------------------------------------------|----------------------|--------------------|
| AGRIBURN        | 280150                                                                                                                                                                                                                                                                                                                                                                                                                                                                                                                                                                                                                                                                                                                                                                                                                                                                                                                | Fire inventory                                                                                | ±5                   | 1.792              |
| AIRCRAFT        | 2275                                                                                                                                                                                                                                                                                                                                                                                                                                                                                                                                                                                                                                                                                                                                                                                                                                                                                                                  | Non-road inventory                                                                            | ±0.5                 | 0.405              |
| BIOGENIC        | 27010, 27012                                                                                                                                                                                                                                                                                                                                                                                                                                                                                                                                                                                                                                                                                                                                                                                                                                                                                                          | BEIS3 calculation                                                                             | ±0.5                 | 0.405              |
| COALCMB         | 101001, 101002, 101003, 102001, 102002, 102003, 103001, 103002, 103003, 10500102, 10500202, 390001, 390002, 390003, 2101001, 2101002, 2101003, 2102001, 2102002, 2103001, 2103002, 2103003, 2104001, 2104001, 2104002, 2104003, 2199001, 2199002, 2199003, 2390001, 2390002, 2390003                                                                                                                                                                                                                                                                                                                                                                                                                                                                                                                                                                                                                                  | Point and area inventories                                                                    | ±0.1                 | 0.095              |
| DIESEL CMB      | 20200401, 20400302, 20400402, 27000, 2800                                                                                                                                                                                                                                                                                                                                                                                                                                                                                                                                                                                                                                                                                                                                                                                                                                                                             | Point inventory                                                                               | ±0.3                 | 0.262              |
| DUST            | 2275085000, 2294000000, 2294000001, 2294000002, 2294005000, 2294005002, 2294010000, 2294010001, 2294010002, 2294015000, 2294015001, 2294015002, 2296000000, 2296005000, 2296010000, 2311000000, 2311000010, 2311000040, 2311000050, 2311000060, 2311000070, 2311010000, 2311010010, 2311010040, 2311010050, 2311010060, 2311010070, 2311020000, 2311020010, 2311020040, 2311020050, 2311020060, 2311020070, 2311030000, 2311030010, 2311030040, 2311030050, 2311030060, 2311030070, 2311040000, 2801000000, 2801000001, 2801000002, 2801000003, 2801000004, 2801000005, 2801000006, 2801000007, 2801000008, 30300519, 30300831, 30300832, 30300833, 30300834, 30302321, 30302322, 30500290, 30501024, 30501030, 30501031, 30501039, 30501045, 30501046, 30501048, 30501049, 30501050, 30501090, 30501640, 30502011, 30502504, 30531090, 31100101, 31100102, 31100103, 31100205, 31100206, 50100401                    | Dust-area and point inventories. Including road dust, industrial dust and livestock dust etc. | ±10                  | 2.398              |
| FUELOIL CMB     | 101004, 101005, 102005, 103004, 103005, 10500105, 10500205, 201001, 202001, 202005, 203001, 20400303, 20400403, 20400408, 30190001, 30190002, 30190011, 30190012, 30190021, 30190022, 30290001, 30290002, 30390001, 30390002, 30390011, 30390012, 30390021, 30390022, 30490001, 30490002, 30490011, 30490012, 30490021, 30490022, 30490031, 30490032, 30590001, 30590002, 30590011, 30590012, 30590021, 30590022, 30600101, 30600103, 30600111, 30600901, 30600902, 30790001, 30790002, 30790011, 30790012, 30790021, 30790022, 30890001, 30890002, 30890011, 30890012, 30890021, 30890022, 30990001, 30990002, 30990011, 30990012, 31000401, 31000401, 31000402, 31000403, 31000411, 31000412, 31000413, 31390001, 31390002, 390004, 390005, 39900501, 39990001, 39990011, 39990012, 399900221, 39990022, 2101004, 2101005, 2102004, 2102005, 2103004, 2103005, 2104004, 2104005, 2199004, 2199005, 2399004, 2399005 | Point and area inventories                                                                    | ±1.0                 | 0.693              |
| LIVESTOCK       | 2805, 2806, 2807, 302021, 302020                                                                                                                                                                                                                                                                                                                                                                                                                                                                                                                                                                                                                                                                                                                                                                                                                                                                                      | Area and point inventories                                                                    | ±0.3                 | 0.262              |
| LPG CMB         | 101010, 102010, 103010, 10500110, 10500210, 202010, 203010, 20400409, 27300, 30290005, 30600107, 30890004, 390010, 399010, 2101007, 2102007, 2103007, 2104007, 2199007, 2399007                                                                                                                                                                                                                                                                                                                                                                                                                                                                                                                                                                                                                                                                                                                                       | Point and area inventories                                                                    | ±0.3                 | 0.262              |
| LWASTEBURN      | 50100202, 502002, 50300201, 2610                                                                                                                                                                                                                                                                                                                                                                                                                                                                                                                                                                                                                                                                                                                                                                                                                                                                                      | Non-fire inventories                                                                          | ±5                   | 1.792              |
| METAL PRODUCT   | 3030, 3038, 3040, 3048, 3090, 3098, 2303, 2304, 2309, 284101                                                                                                                                                                                                                                                                                                                                                                                                                                                                                                                                                                                                                                                                                                                                                                                                                                                          | Point and area inventories                                                                    | ±0.3                 | 0.262              |
| MEAT COOKING    | 302013, 302036, 30203803, 2302002, 2302003                                                                                                                                                                                                                                                                                                                                                                                                                                                                                                                                                                                                                                                                                                                                                                                                                                                                            | Point and area inventories                                                                    | ±5                   | 1.792              |
| MEX CMB_M       | 2101, 2102, 2103, 2104                                                                                                                                                                                                                                                                                                                                                                                                                                                                                                                                                                                                                                                                                                                                                                                                                                                                                                | Mexican Inventory only                                                                        | ±0.5                 | 0.405              |
| MINERAL PRODUCT | 3050, 3051, 3053, 3058, 2305                                                                                                                                                                                                                                                                                                                                                                                                                                                                                                                                                                                                                                                                                                                                                                                                                                                                                          | Point inventory                                                                               | ±0.3                 | 0.262              |

|            |                                                                                                                                                                                                                                                                                                                                                                                                                                                                                                                                                                                                                                                                                                                                                                                                                                                                                                                                                                             |                            |      |       |
|------------|-----------------------------------------------------------------------------------------------------------------------------------------------------------------------------------------------------------------------------------------------------------------------------------------------------------------------------------------------------------------------------------------------------------------------------------------------------------------------------------------------------------------------------------------------------------------------------------------------------------------------------------------------------------------------------------------------------------------------------------------------------------------------------------------------------------------------------------------------------------------------------------------------------------------------------------------------------------------------------|----------------------------|------|-------|
| NAGASCMB   | 101006, 102006, 10201401, 103006, 10500106, 201002, 203002, 20400301, 30190003, 30190013, 30190023, 30290003, 30390013, 30490003, 30490013, 30490023, 30490033, 30500206, 30590003, 30590013, 30590023, 30600105, 30600903, 30609903, 30790003, 30790013, 30790023, 30890003, 30890013, 30890023, 30990003, 30990013, 30990023, 31000404, 31000414, 31390003, 390006, 39900601, 39990003, 39990013, 39990023, 40201001, 40290013, 40290023, 50190006, 50290006, 50390006, 2101006, 2102006, 2103006, 2104006, 2199006, 2399006                                                                                                                                                                                                                                                                                                                                                                                                                                              | Point and area inventories | ±0.5 | 0.405 |
| NRDIESEL   | 2270, 2280002, 2282020, 2283002                                                                                                                                                                                                                                                                                                                                                                                                                                                                                                                                                                                                                                                                                                                                                                                                                                                                                                                                             | Non-road inventory         | ±0.5 | 0.405 |
| NRFUELOIL  | 2280003                                                                                                                                                                                                                                                                                                                                                                                                                                                                                                                                                                                                                                                                                                                                                                                                                                                                                                                                                                     | Non-road inventory         | ±0.5 | 0.405 |
| NRGASOLINE | 2260, 2265, 2280004, 2282005, 2282010                                                                                                                                                                                                                                                                                                                                                                                                                                                                                                                                                                                                                                                                                                                                                                                                                                                                                                                                       | Non-road inventory         | ±0.5 | 0.405 |
| NRLPG      | 2267                                                                                                                                                                                                                                                                                                                                                                                                                                                                                                                                                                                                                                                                                                                                                                                                                                                                                                                                                                        | Non-road inventory         | ±0.5 | 0.405 |
| NRNAGAS    | 2268                                                                                                                                                                                                                                                                                                                                                                                                                                                                                                                                                                                                                                                                                                                                                                                                                                                                                                                                                                        | Non-road inventory         | ±0.5 | 0.405 |
| NROTHERS   | 2280001                                                                                                                                                                                                                                                                                                                                                                                                                                                                                                                                                                                                                                                                                                                                                                                                                                                                                                                                                                     | Non-road inventory         | ±0.5 | 0.405 |
| OPENFIRE   | 2610                                                                                                                                                                                                                                                                                                                                                                                                                                                                                                                                                                                                                                                                                                                                                                                                                                                                                                                                                                        | Fire inventory             | ±5   | 1.792 |
| ORDIESEL   | 2230                                                                                                                                                                                                                                                                                                                                                                                                                                                                                                                                                                                                                                                                                                                                                                                                                                                                                                                                                                        | Mobile6 Calculation        | ±0.5 | 0.405 |
| ORGASOLINE | 2201                                                                                                                                                                                                                                                                                                                                                                                                                                                                                                                                                                                                                                                                                                                                                                                                                                                                                                                                                                        | Mobile6 Calculation        | ±0.5 | 0.405 |
| OTHERCMB   | 20200301, 202017, 203003, 20400401, 2600, 2650, 2750, 2760, 399017, 101007, 101008, 101011, 101012, 101013, 101014, 101015, 102007, 102008, 102011, 102012, 102013, 102014, 102015, 102016, 102017, 103008, 103012, 103013, 10500113, 10500213, 10500214, 201007, 201008, 201009, 201010, 201013, 20200402, 20200403, 202007, 202009, 202017, 203007, 203008, 203009, 204001, 204002, 20400304, 20400305, 20400399, 20400404, 20400405, 20400407, 20400499, 30190004, 30190014, 30190024, 30390004, 30390024, 30490004, 30490014, 30490024, 30490034, 30490035, 30600102, 30600104, 30600106, 30600108, 30600199, 30600904, 30600906, 30600999, 30790004, 30790024, 30890024, 31000405, 31000415, 390007, 390008, 390012, 390013, 399007, 399008, 399016, 39990004, 39990014, 39990024, 2101009, 2101010, 2101011, 2102009, 2102010, 2102011, 2104009, 2104010, 2104011, 2199009, 2199010, 2199011, 2390009, 2390010, 2390011, 2801520000, 2801520004, 2801520010, 28100250 | Point and area inventories | ±0.5 | 0.405 |
| OTHERS     | All leftover SCCs                                                                                                                                                                                                                                                                                                                                                                                                                                                                                                                                                                                                                                                                                                                                                                                                                                                                                                                                                           | Point and area inventories | ±1.0 | 0.693 |
| PRESCRBURN | 2810005, 2810015, 2810020                                                                                                                                                                                                                                                                                                                                                                                                                                                                                                                                                                                                                                                                                                                                                                                                                                                                                                                                                   |                            | ±10  | 2.398 |
| RAILROAD   | 2285                                                                                                                                                                                                                                                                                                                                                                                                                                                                                                                                                                                                                                                                                                                                                                                                                                                                                                                                                                        | Non-road inventory         | ±0.5 | 0.405 |
| SEASALT    | 274004                                                                                                                                                                                                                                                                                                                                                                                                                                                                                                                                                                                                                                                                                                                                                                                                                                                                                                                                                                      | CMAQ Sea-salt Module       | ±0.5 | 0.405 |
| SOLVENT    | 24, 2501, 2505, 2510, 2515, 2306, 2310, 306008, 3909, 4                                                                                                                                                                                                                                                                                                                                                                                                                                                                                                                                                                                                                                                                                                                                                                                                                                                                                                                     | Area and point inventory   | ±0.5 | 2.398 |
| WILDFIRE   | 2810001                                                                                                                                                                                                                                                                                                                                                                                                                                                                                                                                                                                                                                                                                                                                                                                                                                                                                                                                                                     | Fire inventory             | 10   | 0.405 |
| WOODFUEL   | 101009, 102009, 103009, 10500209, 2101008, 2102008, 2103008, 2199008, 2390008                                                                                                                                                                                                                                                                                                                                                                                                                                                                                                                                                                                                                                                                                                                                                                                                                                                                                               | Point and area inventories | ±0.5 | 1.792 |
| WOODSTOVE  | 2104008                                                                                                                                                                                                                                                                                                                                                                                                                                                                                                                                                                                                                                                                                                                                                                                                                                                                                                                                                                     | Area inventory             | ±5   | 0.405 |

**Table S3.** Performance evaluation of CMAQ modeled concentrations (initial predictions) compared to the AQS, SLAMS, CSN, IMPROVE and SEARCH observations.

| Pollutant                                     | Mean of Observation     | Number of Pairs | MNB (%) | MNE (%) |
|-----------------------------------------------|-------------------------|-----------------|---------|---------|
| 1-hr O <sub>3</sub> (with 40ppb cutoff)       | 44.3 ppb                | 33054           | 3.2     | 18.7    |
| 8-hr O <sub>3</sub> (with 40ppb cutoff)       | 44.2 ppb                | 22712           | 1.4     | 14.5    |
| 1-hr NO <sub>2</sub>                          | 9.0 ppb                 | 247911          | 51.2    | 91.1    |
| 1-hr CO                                       | 678.9 ppb               | 259185          | 12.7    | 80.9    |
|                                               |                         |                 | FB (%)  | FE (%)  |
| 1-hr PM <sub>2.5</sub>                        | 10.5 µg m <sup>-3</sup> | 163743          | 34.2    | 70.9    |
| 24-hr PM <sub>2.5</sub>                       | 11.5 µg m <sup>-3</sup> | 11871           | 27.8    | 54.4    |
| 24-hr Sulfate                                 | 1.6 µg m <sup>-3</sup>  | 2865            | 35.1    | 54.4    |
| 24-hr Nitrate                                 | 1.9 µg m <sup>-3</sup>  | 2733            | -44.4   | 95.9    |
| 24-hr Ammonium                                | 1.0 µg m <sup>-3</sup>  | 2862            | 10.1    | 58.1    |
| 24-hr EC                                      | 0.4 µg m <sup>-3</sup>  | 2828            | 23.0    | 71.0    |
| 24-hr OC (no corrections to CSN observations) | 3.5 µg m <sup>-3</sup>  | 2843            | 2.4     | 63.8    |

\* The examined bias and error measures were calculated as follows:

$$MNB = \frac{1}{N} \sum_{i=1}^N \frac{(C_i^{sim} - C_i^{obs})}{C_i^{obs}} \times 100\% , \quad MNE = \frac{1}{N} \sum_{i=1}^N \frac{|C_i^{sim} - C_i^{obs}|}{C_i^{obs}} \times 100\% , \quad FB = \frac{1}{N} \sum_{i=1}^N \frac{2(C_i^{sim} - C_i^{obs})}{(C_i^{sim} + C_i^{obs})} \times 100\% , \quad FE = \frac{1}{N} \sum_{i=1}^N \frac{2|C_i^{sim} - C_i^{obs}|}{(C_i^{sim} + C_i^{obs})} \times 100\% .$$

**Table S4.** Species that measured at CSN monitoring sites

|            | Total mass        | Major Components                   | Elements (35)                                                                                                                           |
|------------|-------------------|------------------------------------|-----------------------------------------------------------------------------------------------------------------------------------------|
| 41 species | PM <sub>2.5</sub> | EC, OC, Sulfate, Nitrate, Ammonium | Na, Mg, Al, Si, P, Cl, K, Ca, Ti, V, Cr, Mn, Fe, Co, Ni, Cu, Zn, Ga, As, Se, Br, Rb, Sr, Zr, Mo, Ag, Cd, In, Sn, Sb, Ba, La, Ce, Hg, Pb |

**Table S5.** Composite PM<sub>2.5</sub> source composition profiles for the 33 categories

| Species | AGRIBURN   | AIRCRAFT   | BIOGENIC   | COALCMB    | DIESELCM   | DUST       | FUELOILC   |
|---------|------------|------------|------------|------------|------------|------------|------------|
| OC      | 3.88E-01   | 1.76E-01   | 0.00E+00   | 3.87E-02   | 1.76E-01   | 4.87E-02   | 1.14E-01   |
| EC      | 1.09E-01   | 7.71E-01   | 0.00E+00   | 2.05E-02   | 7.71E-01   | 1.73E-03   | 4.91E-02   |
| NH4     | 1.80E-02   | 0.00E+00   | 0.00E+00   | 2.42E-02   | 0.00E+00   | 8.62E-04   | 0.00E+00   |
| NO3     | 3.50E-03   | 1.14E-03   | 0.00E+00   | 1.98E-03   | 1.14E-03   | 1.80E-03   | 0.00E+00   |
| SO4     | 1.65E-02   | 2.95E-03   | 0.00E+00   | 1.22E-01   | 2.95E-03   | 5.98E-03   | 3.32E-01   |
| NCOM    | 2.72E-01   | 4.39E-02   | 0.00E+00   | 1.55E-02   | 4.39E-02   | 1.95E-02   | 4.57E-02   |
| MO      | 3.51E-03   | 1.39E-04   | 0.00E+00   | 1.54E-01   | 1.39E-04   | 2.99E-01   | 0.00E+00   |
| H2O     | 0.00E+00   | 0.00E+00   | 0.00E+00   | 0.00E+00   | 0.00E+00   | 1.64E-03   | 0.00E+00   |
| Na      | 6.55E-03   | 0.00E+00   | 0.00E+00   | 1.16E-03   | 0.00E+00   | 1.13E-03   | 0.00E+00   |
| Mg      | 8.06E-04   | 0.00E+00   | 0.00E+00   | 4.26E-03   | 0.00E+00   | 4.04E-03   | 0.00E+00   |
| Al      | 3.00E-04   | 0.00E+00   | 0.00E+00   | 4.35E-02   | 0.00E+00   | 5.94E-02   | 0.00E+00   |
| Si      | 1.50E-04   | 0.00E+00   | 0.00E+00   | 8.02E-02   | 0.00E+00   | 1.74E-01   | 3.47E-03   |
| P       | 0.00E+00   | 0.00E+00   | 0.00E+00   | 2.48E-03   | 0.00E+00   | 9.58E-04   | 0.00E+00   |
| S       | 6.50E-03   | 2.52E-03   | 0.00E+00   | 5.21E-02   | 2.52E-03   | 2.69E-03   | 8.32E-02   |
| Cl      | 9.05E-02   | 2.05E-04   | 0.00E+00   | 5.99E-03   | 2.05E-04   | 1.40E-03   | 1.77E-03   |
| K       | 7.04E-02   | 3.80E-05   | 0.00E+00   | 4.25E-03   | 3.80E-05   | 1.71E-02   | 1.74E-04   |
| Ca      | 3.30E-04   | 5.83E-04   | 0.00E+00   | 3.93E-02   | 5.83E-04   | 5.38E-02   | 2.85E-04   |
| Ti      | 1.00E-05   | 4.00E-06   | 0.00E+00   | 2.44E-03   | 4.00E-06   | 3.89E-03   | 3.64E-04   |
| V       | 0.00E+00   | 6.00E-06   | 0.00E+00   | 1.05E-04   | 6.00E-06   | 2.49E-04   | 4.64E-04   |
| Cr      | 0.00E+00   | 0.00E+00   | 0.00E+00   | 8.41E-05   | 0.00E+00   | 2.21E-04   | 1.08E-04   |
| Mn      | 0.00E+00   | 0.00E+00   | 0.00E+00   | 1.76E-04   | 0.00E+00   | 1.17E-03   | 2.09E-05   |
| Fe      | 1.00E-04   | 2.62E-04   | 0.00E+00   | 2.06E-02   | 2.62E-04   | 4.43E-02   | 5.56E-04   |
| Co      | 0.00E+00   | 2.00E-06   | 0.00E+00   | 4.82E-06   | 2.00E-06   | 4.33E-05   | 0.00E+00   |
| Ni      | 0.00E+00   | 2.00E-06   | 0.00E+00   | 4.26E-05   | 2.00E-06   | 6.66E-05   | 2.73E-04   |
| Cu      | 0.00E+00   | 0.00E+00   | 0.00E+00   | 1.46E-04   | 0.00E+00   | 1.11E-04   | 8.68E-05   |
| Zn      | 1.00E-04   | 6.82E-04   | 0.00E+00   | 5.07E-04   | 6.82E-04   | 5.15E-04   | 7.14E-04   |
| Ga      | 0.00E+00   | 0.00E+00   | 0.00E+00   | 2.02E-05   | 0.00E+00   | 5.74E-07   | 0.00E+00   |
| As      | 0.00E+00   | 3.00E-06   | 0.00E+00   | 1.24E-06   | 3.00E-06   | 1.77E-05   | 0.00E+00   |
| Se      | 0.00E+00   | 0.00E+00   | 0.00E+00   | 2.81E-03   | 0.00E+00   | 1.10E-06   | 2.84E-05   |
| Br      | 2.80E-04   | 1.50E-05   | 0.00E+00   | 2.93E-04   | 1.50E-05   | 1.23E-05   | 0.00E+00   |
| Rb      | 1.00E-04   | 1.00E-06   | 0.00E+00   | 2.93E-05   | 1.00E-06   | 1.03E-04   | 0.00E+00   |
| Sr      | 0.00E+00   | 1.00E-06   | 0.00E+00   | 1.34E-03   | 1.00E-06   | 3.15E-04   | 0.00E+00   |
| Zr      | 0.00E+00   | 0.00E+00   | 0.00E+00   | 9.94E-05   | 0.00E+00   | 1.26E-04   | 0.00E+00   |
| Mo      | 0.00E+00   | 2.00E-06   | 0.00E+00   | 9.56E-06   | 2.00E-06   | 5.23E-06   | 0.00E+00   |
| Pd      | 5.15E-05   | 2.60E-05   | 0.00E+00   | 4.98E-05   | 2.60E-05   | 1.99E-05   | 0.00E+00   |
| Ag      | 1.55E-05   | 6.10E-05   | 0.00E+00   | 8.57E-05   | 6.10E-05   | 4.10E-06   | 0.00E+00   |
| Cd      | 0.00E+00   | 4.40E-05   | 0.00E+00   | 2.36E-05   | 4.40E-05   | 1.46E-05   | 0.00E+00   |
| In      | 5.00E-05   | 1.80E-05   | 0.00E+00   | 3.64E-05   | 1.80E-05   | 7.12E-06   | 0.00E+00   |
| Sn      | 0.00E+00   | 2.50E-05   | 0.00E+00   | 1.30E-04   | 2.50E-05   | 2.80E-05   | 0.00E+00   |
| Sb      | 0.00E+00   | 1.90E-05   | 0.00E+00   | 8.13E-06   | 1.90E-05   | 3.22E-05   | 1.33E-04   |
| Ba      | 2.50E-04   | 3.50E-04   | 0.00E+00   | 3.91E-03   | 3.50E-04   | 7.88E-04   | 0.00E+00   |
| La      | 0.00E+00   | 2.72E-04   | 0.00E+00   | 1.68E-05   | 2.72E-04   | 1.14E-04   | 2.85E-04   |
| Ce      | 0.00E+00   |
| Hg      | 0.00E+00   | 0.00E+00   | 0.00E+00   | 9.20E-06   | 0.00E+00   | 2.09E-06   | 0.00E+00   |
| Pb      | 1.00E-05   | 1.00E-06   | 0.00E+00   | 1.22E-04   | 1.00E-06   | 2.22E-04   | 0.00E+00   |
| PMO     | 1.96E-02   | 2.42E-03   | 0.00E+00   | 4.09E-01   | 2.42E-03   | 2.57E-01   | 4.51E-01   |
| Total   | 1.0066E+00 | 1.0027E+00 | 0.0000E+00 | 1.0522E+00 | 1.0027E+00 | 1.0025E+00 | 1.0832E+00 |

\* "other" PM<sub>2.5</sub> equals to the Total with OC, EC, NH<sub>4</sub>, NO<sub>3</sub>, SO<sub>4</sub>, NCOM, H<sub>2</sub>O and S being removed.

| Species | LIVESTOCK  | LPGCMB     | LWASTEBU   | MEATALPR   | MEATCOOK   | MEXCMB_M   | MINERALP   |
|---------|------------|------------|------------|------------|------------|------------|------------|
| OC      | 0.00E+00   | 2.47E-01   | 3.88E-01   | 7.05E-02   | 6.54E-01   | 1.86E-01   | 7.72E-02   |
| EC      | 0.00E+00   | 3.84E-01   | 1.09E-01   | 1.41E-02   | 3.41E-02   | 8.06E-02   | 1.98E-02   |
| NH4     | 0.00E+00   | 0.00E+00   | 1.80E-02   | 4.06E-04   | 0.00E+00   | 8.39E-04   | 5.92E-03   |
| NO3     | 0.00E+00   | 2.10E-02   | 3.50E-03   | 5.18E-03   | 4.56E-03   | 4.48E-04   | 1.32E-02   |
| SO4     | 0.00E+00   | 8.60E-02   | 1.65E-02   | 1.84E-01   | 2.59E-03   | 1.86E-01   | 1.41E-01   |
| NCOM    | 0.00E+00   | 9.88E-02   | 2.72E-01   | 2.82E-02   | 2.62E-01   | 7.45E-02   | 3.08E-02   |
| MO      | 0.00E+00   | 0.00E+00   | 3.51E-03   | 1.17E-01   | 4.53E-03   | 4.15E-02   | 1.30E-01   |
| H2O     | 0.00E+00   | 0.00E+00   | 0.00E+00   | 4.62E-03   | 9.70E-09   | 0.00E+00   | 2.07E-02   |
| Na      | 0.00E+00   | 0.00E+00   | 6.55E-03   | 3.09E-02   | 3.23E-03   | 1.98E-04   | 2.94E-02   |
| Mg      | 0.00E+00   | 0.00E+00   | 8.06E-04   | 4.60E-03   | 8.00E-04   | 0.00E+00   | 3.24E-03   |
| Al      | 0.00E+00   | 0.00E+00   | 3.00E-04   | 3.48E-02   | 4.36E-04   | 1.37E-02   | 2.49E-02   |
| Si      | 0.00E+00   | 0.00E+00   | 1.50E-04   | 4.01E-02   | 8.08E-04   | 2.63E-02   | 6.27E-02   |
| P       | 0.00E+00   | 0.00E+00   | 0.00E+00   | 1.55E-03   | 4.00E-04   | 2.15E-03   | 3.90E-04   |
| S       | 0.00E+00   | 2.87E-02   | 6.50E-03   | 6.16E-02   | 1.88E-03   | 3.45E-02   | 5.03E-02   |
| Cl      | 0.00E+00   | 0.00E+00   | 9.05E-02   | 1.01E-01   | 8.75E-03   | 7.11E-04   | 2.28E-02   |
| K       | 0.00E+00   | 0.00E+00   | 7.04E-02   | 3.74E-02   | 2.65E-03   | 1.36E-03   | 2.37E-02   |
| Ca      | 0.00E+00   | 0.00E+00   | 3.30E-04   | 1.31E-02   | 5.22E-04   | 8.17E-03   | 6.63E-02   |
| Ti      | 0.00E+00   | 0.00E+00   | 1.00E-05   | 8.86E-04   | 2.80E-05   | 1.04E-03   | 1.86E-03   |
| V       | 0.00E+00   | 0.00E+00   | 0.00E+00   | 1.09E-03   | 1.67E-06   | 5.56E-05   | 1.23E-04   |
| Cr      | 0.00E+00   | 0.00E+00   | 0.00E+00   | 5.04E-03   | 2.41E-04   | 2.19E-04   | 4.26E-04   |
| Mn      | 0.00E+00   | 0.00E+00   | 0.00E+00   | 5.06E-03   | 6.68E-05   | 6.92E-05   | 6.29E-04   |
| Fe      | 0.00E+00   | 0.00E+00   | 1.00E-04   | 7.49E-02   | 7.72E-04   | 7.35E-03   | 1.17E-02   |
| Co      | 0.00E+00   | 0.00E+00   | 0.00E+00   | 2.43E-05   | 6.70E-06   | 0.00E+00   | 7.58E-05   |
| Ni      | 0.00E+00   | 0.00E+00   | 0.00E+00   | 6.03E-03   | 1.32E-04   | 5.67E-05   | 2.16E-04   |
| Cu      | 0.00E+00   | 0.00E+00   | 0.00E+00   | 5.48E-03   | 1.20E-04   | 1.80E-04   | 1.45E-04   |
| Zn      | 0.00E+00   | 0.00E+00   | 1.00E-04   | 2.55E-03   | 2.58E-04   | 1.27E-03   | 1.16E-03   |
| Ga      | 0.00E+00   | 0.00E+00   | 0.00E+00   | 1.98E-05   | 0.00E+00   | 3.05E-05   | 1.21E-06   |
| As      | 0.00E+00   | 0.00E+00   | 0.00E+00   | 4.09E-04   | 2.93E-06   | 0.00E+00   | 5.57E-05   |
| Se      | 0.00E+00   | 0.00E+00   | 0.00E+00   | 1.68E-04   | 1.01E-05   | 1.02E-04   | 7.68E-05   |
| Br      | 0.00E+00   | 0.00E+00   | 2.80E-04   | 1.42E-03   | 1.67E-04   | 3.74E-05   | 3.43E-04   |
| Rb      | 0.00E+00   | 0.00E+00   | 1.00E-04   | 5.68E-04   | 1.46E-04   | 8.17E-06   | 2.22E-04   |
| Sr      | 0.00E+00   | 0.00E+00   | 0.00E+00   | 2.97E-04   | 2.07E-05   | 4.49E-04   | 3.27E-04   |
| Zr      | 0.00E+00   | 0.00E+00   | 0.00E+00   | 1.56E-04   | 0.00E+00   | 5.69E-05   | 7.77E-05   |
| Mo      | 0.00E+00   | 0.00E+00   | 0.00E+00   | 1.39E-03   | 0.00E+00   | 1.35E-05   | 6.61E-05   |
| Pd      | 0.00E+00   | 0.00E+00   | 5.15E-05   | 1.82E-06   | 0.00E+00   | 0.00E+00   | 1.57E-05   |
| Ag      | 0.00E+00   | 0.00E+00   | 1.55E-05   | 1.44E-04   | 3.68E-05   | 0.00E+00   | 2.26E-05   |
| Cd      | 0.00E+00   | 0.00E+00   | 0.00E+00   | 3.01E-04   | 1.67E-06   | 0.00E+00   | 3.73E-05   |
| In      | 0.00E+00   | 0.00E+00   | 5.00E-05   | 2.15E-05   | 1.67E-06   | 0.00E+00   | 4.50E-05   |
| Sn      | 0.00E+00   | 0.00E+00   | 0.00E+00   | 3.78E-04   | 1.17E-05   | 0.00E+00   | 1.22E-04   |
| Sb      | 0.00E+00   | 0.00E+00   | 0.00E+00   | 8.15E-04   | 2.26E-05   | 1.55E-05   | 1.63E-05   |
| Ba      | 0.00E+00   | 0.00E+00   | 2.50E-04   | 2.81E-03   | 9.15E-04   | 3.05E-03   | 6.51E-04   |
| La      | 0.00E+00   | 0.00E+00   | 0.00E+00   | 1.69E-06   | 8.37E-05   | 3.32E-05   | 1.39E-04   |
| Ce      | 0.00E+00   | 0.00E+00   | 0.00E+00   | 4.59E-04   | 0.00E+00   | 0.00E+00   | 2.99E-05   |
| Hg      | 0.00E+00   | 0.00E+00   | 0.00E+00   | 1.65E-06   | 8.37E-07   | 0.00E+00   | 5.55E-06   |
| Pb      | 0.00E+00   | 0.00E+00   | 1.00E-05   | 2.10E-03   | 3.77E-04   | 1.56E-04   | 4.63E-04   |
| PMO     | 0.00E+00   | 1.63E-01   | 1.96E-02   | 2.01E-01   | 1.69E-02   | 3.64E-01   | 3.09E-01   |
| Total   | 0.0000E+00 | 1.0285E+00 | 1.0066E+00 | 1.0617E+00 | 1.0019E+00 | 1.0349E+00 | 1.0508E+00 |

| Species | NAGASCMB   | NRDIESEL   | NRFUELOI   | NRGASOL    | NRLPG      | NRNAGAS    | NROTHERS   |
|---------|------------|------------|------------|------------|------------|------------|------------|
| OC      | 4.76E-01   | 1.76E-01   | 1.00E-02   | 4.75E-01   | 4.90E-01   | 4.90E-01   | 2.53E-01   |
| EC      | 8.51E-02   | 7.71E-01   | 1.00E-02   | 1.22E-01   | 6.70E-02   | 6.70E-02   | 6.03E-01   |
| NH4     | 4.15E-03   | 0.00E+00   | 0.00E+00   | 0.00E+00   | 4.40E-03   | 4.40E-03   | 2.77E-05   |
| NO3     | 3.34E-02   | 1.14E-03   | 0.00E+00   | 7.00E-04   | 3.41E-02   | 3.41E-02   | 1.24E-03   |
| SO4     | 1.24E-01   | 2.95E-03   | 4.40E-01   | 5.00E-04   | 1.26E-01   | 1.26E-01   | 3.11E-03   |
| NCOM    | 1.90E-01   | 4.39E-02   | 4.00E-03   | 1.19E-01   | 1.96E-01   | 1.96E-01   | 6.38E-02   |
| MO      | 4.15E-04   | 1.39E-04   | 0.00E+00   | 1.95E-03   | 4.40E-04   | 4.40E-04   | 5.97E-04   |
| H2O     | 0.00E+00   |
| Na      | 2.01E-02   | 0.00E+00   | 0.00E+00   | 0.00E+00   | 2.13E-02   | 2.13E-02   | 1.34E-04   |
| Mg      | 0.00E+00   |
| Al      | 2.07E-03   | 0.00E+00   | 0.00E+00   | 0.00E+00   | 2.20E-03   | 2.20E-03   | 1.38E-05   |
| Si      | 2.64E-03   | 0.00E+00   | 0.00E+00   | 1.20E-03   | 2.80E-03   | 2.80E-03   | 3.20E-04   |
| P       | 2.83E-04   | 0.00E+00   | 0.00E+00   | 3.00E-04   | 3.00E-04   | 3.00E-04   | 7.75E-05   |
| S       | 4.12E-02   | 2.52E-03   | 1.26E-01   | 1.67E-04   | 4.20E-02   | 4.20E-02   | 2.18E-03   |
| Cl      | 3.66E-02   | 2.05E-04   | 3.13E-03   | 0.00E+00   | 3.88E-02   | 3.88E-02   | 3.96E-04   |
| K       | 1.60E-03   | 3.80E-05   | 0.00E+00   | 0.00E+00   | 1.70E-03   | 1.70E-03   | 3.89E-05   |
| Ca      | 9.81E-03   | 5.83E-04   | 3.51E-04   | 3.00E-04   | 1.04E-02   | 1.04E-02   | 5.73E-04   |
| Ti      | 9.43E-04   | 4.00E-06   | 6.43E-04   | 0.00E+00   | 1.00E-03   | 1.00E-03   | 9.25E-06   |
| V       | 1.70E-04   | 6.00E-06   | 8.19E-04   | 0.00E+00   | 1.80E-04   | 1.80E-04   | 5.58E-06   |
| Cr      | 4.72E-04   | 0.00E+00   | 0.00E+00   | 0.00E+00   | 5.00E-04   | 5.00E-04   | 3.14E-06   |
| Mn      | 1.89E-04   | 0.00E+00   | 3.70E-05   | 0.00E+00   | 2.00E-04   | 2.00E-04   | 1.26E-06   |
| Fe      | 8.49E-04   | 2.62E-04   | 2.93E-04   | 1.00E-04   | 9.00E-04   | 9.00E-04   | 2.25E-04   |
| Co      | 0.00E+00   | 2.00E-06   | 0.00E+00   | 0.00E+00   | 0.00E+00   | 0.00E+00   | 1.48E-06   |
| Ni      | 8.49E-04   | 2.00E-06   | 4.83E-04   | 0.00E+00   | 9.00E-04   | 9.00E-04   | 7.14E-06   |
| Cu      | 0.00E+00   |
| Zn      | 0.00E+00   | 6.82E-04   | 7.38E-05   | 3.00E-04   | 0.00E+00   | 0.00E+00   | 5.81E-04   |
| Ga      | 0.00E+00   |
| As      | 0.00E+00   | 3.00E-06   | 0.00E+00   | 0.00E+00   | 0.00E+00   | 0.00E+00   | 2.23E-06   |
| Se      | 5.75E-04   | 0.00E+00   | 5.02E-05   | 0.00E+00   | 6.10E-04   | 6.10E-04   | 3.83E-06   |
| Br      | 3.77E-04   | 1.50E-05   | 0.00E+00   | 0.00E+00   | 4.00E-04   | 4.00E-04   | 1.36E-05   |
| Rb      | 1.89E-04   | 1.00E-06   | 0.00E+00   | 0.00E+00   | 2.00E-04   | 2.00E-04   | 2.00E-06   |
| Sr      | 0.00E+00   | 1.00E-06   | 0.00E+00   | 0.00E+00   | 0.00E+00   | 0.00E+00   | 7.42E-07   |
| Zr      | 0.00E+00   |
| Mo      | 0.00E+00   | 2.00E-06   | 0.00E+00   | 0.00E+00   | 0.00E+00   | 0.00E+00   | 1.48E-06   |
| Pd      | 0.00E+00   | 2.60E-05   | 0.00E+00   | 0.00E+00   | 0.00E+00   | 0.00E+00   | 1.93E-05   |
| Ag      | 0.00E+00   | 6.10E-05   | 0.00E+00   | 0.00E+00   | 0.00E+00   | 0.00E+00   | 4.52E-05   |
| Cd      | 0.00E+00   | 4.40E-05   | 0.00E+00   | 1.00E-04   | 0.00E+00   | 0.00E+00   | 5.78E-05   |
| In      | 0.00E+00   | 1.80E-05   | 0.00E+00   | 1.00E-04   | 0.00E+00   | 0.00E+00   | 3.85E-05   |
| Sn      | 0.00E+00   | 2.50E-05   | 0.00E+00   | 0.00E+00   | 0.00E+00   | 0.00E+00   | 1.85E-05   |
| Sb      | 0.00E+00   | 1.90E-05   | 2.35E-04   | 2.00E-04   | 0.00E+00   | 0.00E+00   | 6.45E-05   |
| Ba      | 0.00E+00   | 3.50E-04   | 0.00E+00   | 0.00E+00   | 0.00E+00   | 0.00E+00   | 2.60E-04   |
| La      | 0.00E+00   | 2.72E-04   | 5.04E-04   | 0.00E+00   | 0.00E+00   | 0.00E+00   | 2.02E-04   |
| Ce      | 0.00E+00   |
| Hg      | 0.00E+00   |
| Pb      | 0.00E+00   | 1.00E-06   | 0.00E+00   | 3.00E-04   | 0.00E+00   | 0.00E+00   | 7.63E-05   |
| PMO     | 9.29E-03   | 2.42E-03   | 5.29E-01   | 2.78E-01   | 0.00E+00   | 0.00E+00   | 7.18E-02   |
| Total   | 1.0415E+00 | 1.0027E+00 | 1.1256E+00 | 1.0002E+00 | 1.0423E+00 | 1.0423E+00 | 1.0023E+00 |



| Species | OPENFIRE   | ORDIESEL   | ORGASOL    | OTHERCMB   | OTHERS     | PRESCRBU   | RAILROAD   |
|---------|------------|------------|------------|------------|------------|------------|------------|
| OC      | 3.88E-01   | 1.84E-01   | 4.11E-01   | 2.41E-01   | 1.12E-01   | 5.03E-01   | 1.76E-01   |
| EC      | 1.09E-01   | 7.47E-01   | 1.45E-01   | 1.01E-01   | 2.31E-02   | 1.05E-01   | 7.71E-01   |
| NH4     | 1.80E-02   | 1.66E-04   | 1.00E-02   | 3.15E-02   | 7.49E-03   | 3.19E-03   | 4.85E-09   |
| NO3     | 3.50E-03   | 1.18E-03   | 1.54E-03   | 8.81E-03   | 8.13E-03   | 1.01E-02   | 1.14E-03   |
| SO4     | 1.65E-02   | 3.92E-03   | 1.80E-02   | 1.26E-01   | 1.39E-01   | 3.91E-03   | 2.95E-03   |
| NCOM    | 2.72E-01   | 4.71E-02   | 1.15E-01   | 9.67E-02   | 4.58E-02   | 3.52E-01   | 4.39E-02   |
| MO      | 3.51E-03   | 3.39E-03   | 7.49E-02   | 9.91E-02   | 5.74E-02   | 4.68E-03   | 1.39E-04   |
| H2O     | 0.00E+00   | 2.25E-04   | 3.18E-03   | 2.93E-07   | 1.40E-02   | 0.00E+00   | 0.00E+00   |
| Na      | 6.55E-03   | 2.01E-05   | 7.59E-04   | 2.19E-03   | 4.36E-02   | 2.38E-03   | 2.35E-08   |
| Mg      | 8.06E-04   | 1.52E-03   | 3.29E-02   | 7.61E-04   | 1.00E-03   | 0.00E+00   | 0.00E+00   |
| Al      | 3.00E-04   | 3.09E-05   | 1.31E-03   | 8.09E-03   | 9.45E-03   | 4.97E-04   | 2.42E-09   |
| Si      | 1.50E-04   | 1.28E-03   | 2.88E-02   | 6.71E-02   | 2.95E-02   | 1.97E-04   | 6.54E-08   |
| P       | 0.00E+00   | 2.50E-05   | 1.17E-03   | 1.12E-03   | 9.65E-04   | 6.20E-04   | 1.59E-08   |
| S       | 6.50E-03   | 2.81E-03   | 7.61E-03   | 4.33E-02   | 4.40E-02   | 1.58E-03   | 2.52E-03   |
| Cl      | 9.05E-02   | 3.39E-04   | 1.77E-03   | 2.77E-02   | 1.79E-02   | 2.57E-03   | 2.05E-04   |
| K       | 7.04E-02   | 4.50E-05   | 2.06E-04   | 3.61E-02   | 1.22E-02   | 2.11E-03   | 3.80E-05   |
| Ca      | 3.30E-04   | 7.13E-04   | 4.77E-03   | 9.98E-03   | 1.12E-02   | 7.73E-04   | 5.83E-04   |
| Ti      | 1.00E-05   | 5.84E-05   | 1.13E-03   | 6.05E-04   | 5.53E-03   | 6.34E-04   | 4.00E-06   |
| V       | 0.00E+00   | 1.03E-05   | 1.10E-04   | 1.08E-04   | 1.51E-04   | 1.19E-05   | 6.00E-06   |
| Cr      | 0.00E+00   | 1.54E-05   | 3.52E-04   | 6.31E-05   | 2.61E-04   | 2.55E-05   | 5.51E-10   |
| Mn      | 0.00E+00   | 1.62E-05   | 3.49E-04   | 1.72E-04   | 4.75E-04   | 1.14E-04   | 2.20E-10   |
| Fe      | 1.00E-04   | 1.91E-03   | 3.66E-02   | 8.62E-03   | 6.95E-03   | 4.44E-04   | 2.62E-04   |
| Co      | 0.00E+00   | 2.87E-06   | 2.50E-05   | 4.45E-06   | 1.62E-05   | 0.00E+00   | 2.00E-06   |
| Ni      | 0.00E+00   | 1.17E-05   | 2.37E-04   | 2.05E-04   | 2.82E-04   | 2.32E-05   | 2.00E-06   |
| Cu      | 0.00E+00   | 1.65E-04   | 3.55E-03   | 2.34E-03   | 2.74E-04   | 2.19E-05   | 0.00E+00   |
| Zn      | 1.00E-04   | 7.64E-04   | 2.66E-03   | 7.50E-03   | 4.97E-04   | 2.16E-03   | 6.82E-04   |
| Ga      | 0.00E+00   | 5.42E-08   | 5.20E-06   | 1.66E-05   | 4.94E-06   | 0.00E+00   | 0.00E+00   |
| As      | 0.00E+00   | 3.10E-06   | 6.04E-06   | 2.28E-05   | 2.89E-05   | 0.00E+00   | 3.00E-06   |
| Se      | 0.00E+00   | 5.81E-07   | 1.17E-05   | 1.90E-05   | 1.05E-05   | 0.00E+00   | 6.72E-10   |
| Br      | 2.80E-04   | 1.52E-05   | 4.86E-05   | 5.55E-05   | 4.82E-04   | 1.03E-04   | 1.50E-05   |
| Rb      | 1.00E-04   | 1.63E-06   | 1.57E-05   | 2.25E-05   | 5.81E-05   | 0.00E+00   | 1.00E-06   |
| Sr      | 0.00E+00   | 9.87E-06   | 1.83E-04   | 8.56E-05   | 4.06E-05   | 0.00E+00   | 1.00E-06   |
| Zr      | 0.00E+00   | 0.00E+00   | 5.37E-06   | 4.10E-05   | 3.78E-05   | 0.00E+00   | 0.00E+00   |
| Mo      | 0.00E+00   | 5.24E-05   | 1.10E-03   | 3.61E-05   | 4.93E-05   | 0.00E+00   | 2.00E-06   |
| Pd      | 5.15E-05   | 2.51E-05   | 3.52E-05   | 1.91E-05   | 1.56E-05   | 0.00E+00   | 2.60E-05   |
| Ag      | 1.55E-05   | 5.91E-05   | 3.46E-05   | 2.76E-05   | 2.51E-05   | 1.95E-04   | 6.10E-05   |
| Cd      | 0.00E+00   | 4.26E-05   | 4.33E-05   | 1.95E-04   | 4.02E-05   | 4.57E-03   | 4.40E-05   |
| In      | 5.00E-05   | 1.79E-05   | 2.09E-05   | 1.07E-05   | 6.81E-06   | 0.00E+00   | 1.80E-05   |
| Sn      | 0.00E+00   | 1.14E-04   | 2.01E-03   | 2.12E-05   | 6.86E-05   | 1.88E-04   | 2.50E-05   |
| Sb      | 0.00E+00   | 1.96E-05   | 1.13E-04   | 4.05E-05   | 2.12E-04   | 0.00E+00   | 1.90E-05   |
| Ba      | 2.50E-04   | 8.10E-04   | 1.05E-02   | 5.11E-04   | 5.34E-04   | 0.00E+00   | 3.50E-04   |
| La      | 0.00E+00   | 2.59E-04   | 1.99E-04   | 1.64E-04   | 9.03E-04   | 0.00E+00   | 2.72E-04   |
| Ce      | 0.00E+00   | 1.36E-07   | 2.93E-06   | 1.35E-05   | 7.76E-05   | 0.00E+00   | 0.00E+00   |
| Hg      | 0.00E+00   | 0.00E+00   | 6.86E-06   | 1.40E-08   | 3.00E-06   | 0.00E+00   | 0.00E+00   |
| Pb      | 1.00E-05   | 7.55E-06   | 3.16E-04   | 2.28E-05   | 1.36E-04   | 1.41E-04   | 1.02E-06   |
| PMO     | 1.96E-02   | 5.57E-03   | 8.97E-02   | 1.21E-01   | 4.51E-01   | 0.00E+00   | 2.43E-03   |
| Total   | 1.0066E+00 | 1.0030E+00 | 1.0075E+00 | 1.0431E+00 | 1.0439E+00 | 1.0012E+00 | 1.0027E+00 |

| Species | SOLVENT    | WILDFIRE   | WOODFUEL   | WOODSTOV   | SEASALT    |
|---------|------------|------------|------------|------------|------------|
| OC      | 2.74E-01   | 4.62E-01   | 3.51E-01   | 5.28E-01   | 0.00E+00   |
| EC      | 4.65E-03   | 9.49E-02   | 3.71E-02   | 5.58E-02   | 0.00E+00   |
| NH4     | 7.46E-04   | 8.79E-03   | 0.00E+00   | 1.50E-03   | 0.00E+00   |
| NO3     | 3.55E-04   | 1.32E-03   | 0.00E+00   | 1.90E-03   | 0.00E+00   |
| SO4     | 2.83E-02   | 1.26E-02   | 6.53E-02   | 4.10E-03   | 7.57E-02   |
| NCOM    | 1.09E-01   | 3.23E-01   | 1.40E-01   | 3.70E-01   | 0.00E+00   |
| MO      | 1.80E-01   | 1.28E-02   | 1.66E-01   | 3.02E-03   | 0.00E+00   |
| H2O     | 6.98E-03   | 0.00E+00   | 0.00E+00   | 0.00E+00   | 2.40E-02   |
| Na      | 2.41E-05   | 5.73E-03   | 1.51E-03   | 9.40E-04   | 3.01E-01   |
| Mg      | 0.00E+00   | 3.14E-04   | 1.42E-03   | 1.13E-04   | 3.59E-02   |
| Al      | 2.45E-02   | 6.08E-04   | 0.00E+00   | 1.10E-04   | 0.00E+00   |
| Si      | 2.52E-02   | 1.82E-03   | 1.36E-01   | 3.40E-04   | 0.00E+00   |
| P       | 0.00E+00   | 5.40E-05   | 7.53E-04   | 4.00E-05   | 0.00E+00   |
| S       | 9.44E-03   | 4.32E-03   | 3.10E-02   | 1.82E-03   | 2.49E-02   |
| Cl      | 3.16E-03   | 4.15E-02   | 5.35E-03   | 2.97E-03   | 5.41E-01   |
| K       | 1.95E-03   | 2.94E-02   | 8.87E-02   | 9.67E-03   | 1.12E-02   |
| Ca      | 2.50E-02   | 3.86E-03   | 6.36E-03   | 1.00E-04   | 1.15E-02   |
| Ti      | 1.69E-01   | 5.15E-05   | 0.00E+00   | 0.00E+00   | 0.00E+00   |
| V       | 0.00E+00   | 3.50E-06   | 0.00E+00   | 0.00E+00   | 0.00E+00   |
| Cr      | 0.00E+00   | 8.00E-06   | 0.00E+00   | 0.00E+00   | 0.00E+00   |
| Mn      | 0.00E+00   | 1.60E-05   | 0.00E+00   | 0.00E+00   | 0.00E+00   |
| Fe      | 3.33E-04   | 4.34E-04   | 0.00E+00   | 9.00E-05   | 0.00E+00   |
| Co      | 6.61E-05   | 5.00E-07   | 0.00E+00   | 0.00E+00   | 0.00E+00   |
| Ni      | 0.00E+00   | 5.50E-06   | 0.00E+00   | 0.00E+00   | 0.00E+00   |
| Cu      | 1.54E-05   | 1.60E-05   | 0.00E+00   | 0.00E+00   | 0.00E+00   |
| Zn      | 1.10E-05   | 1.67E-04   | 0.00E+00   | 2.20E-04   | 0.00E+00   |
| Ga      | 0.00E+00   | 5.00E-07   | 0.00E+00   | 0.00E+00   | 0.00E+00   |
| As      | 0.00E+00   | 1.23E-04   | 0.00E+00   | 2.00E-06   | 0.00E+00   |
| Se      | 0.00E+00   | 6.00E-06   | 0.00E+00   | 0.00E+00   | 0.00E+00   |
| Br      | 9.91E-05   | 4.20E-04   | 0.00E+00   | 2.00E-05   | 0.00E+00   |
| Rb      | 6.61E-05   | 1.90E-05   | 0.00E+00   | 6.00E-06   | 0.00E+00   |
| Sr      | 3.30E-05   | 3.85E-05   | 0.00E+00   | 0.00E+00   | 0.00E+00   |
| Zr      | 4.30E-04   | 6.00E-06   | 0.00E+00   | 0.00E+00   | 0.00E+00   |
| Mo      | 3.30E-05   | 5.00E-07   | 0.00E+00   | 0.00E+00   | 0.00E+00   |
| Pd      | 0.00E+00   | 5.00E-07   | 0.00E+00   | 1.00E-06   | 0.00E+00   |
| Ag      | 0.00E+00   | 2.50E-06   | 0.00E+00   | 7.00E-06   | 0.00E+00   |
| Cd      | 4.63E-04   | 5.50E-06   | 0.00E+00   | 7.00E-06   | 0.00E+00   |
| In      | 0.00E+00   | 1.45E-05   | 0.00E+00   | 0.00E+00   | 0.00E+00   |
| Sn      | 0.00E+00   | 1.45E-05   | 0.00E+00   | 1.00E-05   | 0.00E+00   |
| Sb      | 4.69E-03   | 7.00E-06   | 0.00E+00   | 0.00E+00   | 0.00E+00   |
| Ba      | 1.25E-02   | 2.25E-05   | 0.00E+00   | 0.00E+00   | 0.00E+00   |
| La      | 1.86E-02   | 2.00E-06   | 0.00E+00   | 1.00E-05   | 0.00E+00   |
| Ce      | 0.00E+00   | 0.00E+00   | 0.00E+00   | 0.00E+00   | 0.00E+00   |
| Hg      | 0.00E+00   | 2.50E-06   | 0.00E+00   | 0.00E+00   | 0.00E+00   |
| Pb      | 3.00E-04   | 1.60E-05   | 0.00E+00   | 6.00E-06   | 0.00E+00   |
| PMO     | 1.10E-01   | 0.00E+00   | 0.00E+00   | 2.11E-02   | 0.00E+00   |
| Total   | 1.0096E+00 | 1.0044E+00 | 1.0305E+00 | 1.0019E+00 | 1.0249E+00 |

**Table S6.** Typical normalized prediction errors ( $\delta_i$ ) of CTM

| Species    | PM <sub>2.5</sub> | EC  | OC  | Sulfate | Nitrate | Ammonium | Elements |
|------------|-------------------|-----|-----|---------|---------|----------|----------|
| $\delta_i$ | 0.4               | 0.6 | 0.8 | 0.3     | 0.8     | 0.4      | 0.35     |

**Table S7.** Brief information of the selected six CSN sites

|            |            |           |            |               |           |               |
|------------|------------|-----------|------------|---------------|-----------|---------------|
| Site ID    | 13089002   | 170310076 | 261630001  | 060658001     | 360050083 | 420030008     |
| Metro Area | Atlanta    | Chicago   | Detroit    | Los Angeles   | New York  | Pittsburgh    |
| County     | DaKalb, GA | Cook, IL  | Wayne, MI  | Riverside, CA | Bronx, NY | Allegheny, PA |
| City       | Decatur    | Chicago   | Allen Park | Rubidoux      | Bronx     | Pittsburgh    |
| Elevation  | 308 m      | 188 m     | 182 m      | 248 m         | 24 m      | 312 m         |
| Latitude   | 33.688     | 41.751    | 42.229     | 34.000        | 40.865    | 40.466        |
| Longitude  | -84.290    | -87.714   | -83.208    | 117.417       | -73.881   | -79.961       |
| Setting    | suburban   | suburban  | suburban   | suburban      | urban     | urban         |

**Table S8. (a)** Average daily a priori emissions estimates within a radius of approximate 54-km distance of Atlanta site (tons/day)

| Category       | NO <sub>x</sub> | VOC    | PM <sub>2.5</sub> | SO <sub>2</sub> | NH <sub>3</sub> | CO      | PEC  | POA   |
|----------------|-----------------|--------|-------------------|-----------------|-----------------|---------|------|-------|
| AGRIBURN       | 0.00            | 0.12   | 0.22              | 0.00            | 0.00            | 1.21    | 0.01 | 0.15  |
| AIRCRAFT       | 14.94           | 0.99   | 4.01              | 1.25            | 0.00            | 15.77   | 2.64 | 1.17  |
| BIOGENIC       | 1.67            | 36.94  | 0.00              | 0.00            | 0.00            | 6.91    | 0.00 | 0.00  |
| COALCMB        | 100.03          | 2.16   | 6.27              | 448.63          | 0.00            | 15.12   | 0.06 | 1.25  |
| DIESELCMB      | 0.02            | 0.01   | 0.00              | 0.00            | 0.00            | 0.03    | 0.00 | 0.00  |
| DUST           | 0.00            | 0.00   | 16.14             | 0.00            | 0.00            | 0.00    | 0.08 | 1.05  |
| FUEOILCMB      | 4.49            | 0.05   | 0.45              | 20.60           | 0.03            | 0.86    | 0.04 | 0.03  |
| LIVESTOCK      | 0.00            | 0.00   | 0.00              | 0.00            | 2.47            | 0.00    | 0.00 | 0.00  |
| LPGCMB         | 1.49            | 0.04   | 0.00              | 0.08            | 0.00            | 0.23    | 0.00 | 0.00  |
| LWASTEBURN     | 0.74            | 3.87   | 4.70              | 0.13            | 0.00            | 18.20   | 0.17 | 0.22  |
| METALPRODUCT   | 0.03            | 0.00   | 0.00              | 0.00            | 0.00            | 0.02    | 0.00 | 0.00  |
| MEATCOOKING    | 0.00            | 0.00   | 0.00              | 0.00            | 0.00            | 0.00    | 0.00 | 0.00  |
| MEXCMB_M       | 0.00            | 0.00   | 0.00              | 0.00            | 0.00            | 0.00    | 0.00 | 0.00  |
| MINERALPRODUCT | 5.16            | 0.38   | 1.15              | 5.01            | 0.50            | 0.85    | 0.02 | 0.35  |
| NAGASCMB       | 47.05           | 1.28   | 3.51              | 1.02            | 0.00            | 34.46   | 0.00 | 2.11  |
| NRDIESEL       | 31.02           | 1.28   | 3.03              | 3.99            | 0.02            | 17.07   | 2.24 | 0.68  |
| NRFUELOIL      | 0.00            | 0.00   | 0.00              | 0.00            | 0.00            | 0.00    | 0.00 | 0.00  |
| NRGASOLINE     | 3.32            | 24.48  | 0.85              | 0.11            | 0.01            | 441.94  | 0.07 | 0.67  |
| NRLPG          | 7.64            | 1.89   | 0.03              | 0.01            | 0.01            | 29.73   | 0.00 | 0.03  |
| NRNAGAS        | 0.95            | 0.01   | 0.00              | 0.00            | 0.00            | 3.76    | 0.00 | 0.00  |
| NROTHERS       | 0.00            | 0.00   | 0.00              | 0.00            | 0.00            | 0.00    | 0.00 | 0.00  |
| OPENFIRE       | 0.72            | 1.75   | 2.43              | 0.00            | 0.00            | 24.19   | 0.10 | 1.63  |
| ORDIESEL       | 120.82          | 1.94   | 3.32              | 4.15            | 0.25            | 28.78   | 1.94 | 0.98  |
| ORGASOLINE     | 172.37          | 171.61 | 1.76              | 3.77            | 11.36           | 2790.59 | 0.20 | 0.50  |
| OTHERCMB       | 0.19            | 0.03   | 0.00              | 0.00            | 0.00            | 0.11    | 0.00 | 0.00  |
| OTHERS         | 1.00            | 9.11   | 0.89              | 0.09            | 0.14            | 3.42    | 0.02 | 0.04  |
| PRESCRIBURN    | 0.67            | 0.97   | 2.60              | 0.18            | 0.14            | 31.14   | 0.42 | 2.00  |
| RAILROAD       | 15.80           | 0.23   | 0.37              | 0.93            | 0.00            | 1.88    | 0.27 | 0.08  |
| SEASALT        | 0.00            | 0.00   | 0.00              | 0.00            | 0.00            | 0.00    | 0.00 | 0.00  |
| SOLVENT        | 0.11            | 299.31 | 0.00              | 0.00            | 0.00            | 0.08    | 0.00 | 0.00  |
| WILDFIRE       | 0.03            | 0.04   | 0.11              | 0.01            | 0.01            | 1.29    | 0.02 | 0.08  |
| WOODFUEL       | 0.00            | 0.00   | 0.00              | 0.00            | 0.00            | 0.00    | 0.00 | 0.00  |
| WOODSTOVE      | 1.00            | 52.42  | 25.09             | 0.35            | 0.00            | 93.21   | 2.70 | 14.19 |

**Table S8. (b)** Average daily a priori emissions estimates within a radius of approximate 54-km distance of Chicago site (tons/day)

| Category       | NO <sub>x</sub> | VOC    | PM <sub>2.5</sub> | SO <sub>2</sub> | NH <sub>3</sub> | CO      | PEC  | POA   |
|----------------|-----------------|--------|-------------------|-----------------|-----------------|---------|------|-------|
| AGRIBURN       | 0.00            | 0.00   | 0.00              | 0.00            | 0.00            | 0.00    | 0.00 | 0.00  |
| AIRCRAFT       | 12.65           | 2.36   | 0.12              | 1.18            | 0.00            | 22.14   | 0.08 | 0.03  |
| BIOGENIC       | 0.77            | 0.73   | 0.00              | 0.00            | 0.00            | 0.30    | 0.00 | 0.00  |
| COALCMB        | 117.21          | 2.00   | 5.99              | 205.23          | 0.06            | 23.99   | 0.06 | 1.20  |
| DIESEL CMB     | 0.66            | 0.14   | 0.05              | 0.04            | 0.00            | 0.26    | 0.04 | 0.01  |
| DUST           | 0.00            | 0.00   | 16.31             | 0.00            | 0.00            | 0.00    | 0.08 | 1.05  |
| FUELOIL CMB    | 26.69           | 0.95   | 3.04              | 92.33           | 0.46            | 3.39    | 0.39 | 0.21  |
| LIVESTOCK      | 0.00            | 0.00   | 0.00              | 0.00            | 0.99            | 0.00    | 0.00 | 0.00  |
| LPG CMB        | 1.28            | 0.06   | 0.29              | 0.06            | 0.00            | 0.27    | 0.00 | 0.18  |
| LWASTEBURN     | 1.85            | 4.66   | 6.41              | 0.01            | 0.00            | 61.56   | 0.25 | 4.11  |
| METALPRODUCT   | 25.88           | 18.73  | 47.50             | 42.90           | 1.54            | 962.36  | 0.32 | 7.27  |
| MEATCOOKING    | 0.02            | 1.14   | 5.55              | 0.02            | 0.00            | 2.33    | 0.07 | 5.39  |
| MEXCMB_M       | 0.00            | 0.00   | 0.00              | 0.00            | 0.00            | 0.00    | 0.00 | 0.00  |
| MINERALPRODUCT | 11.05           | 1.00   | 3.85              | 15.85           | 0.00            | 6.32    | 0.04 | 0.26  |
| NAGASCMB       | 271.19          | 6.85   | 21.78             | 137.60          | 6.35            | 71.87   | 0.00 | 12.93 |
| NRDIESEL       | 77.13           | 1.95   | 5.00              | 7.01            | 0.05            | 25.02   | 3.70 | 1.12  |
| NRFUELOIL      | 10.66           | 0.29   | 0.43              | 5.73            | 0.00            | 1.40    | 0.04 | 0.05  |
| NRGASOLINE     | 12.06           | 77.05  | 2.77              | 0.18            | 0.04            | 681.29  | 0.22 | 2.18  |
| NRLPG          | 19.05           | 4.76   | 0.09              | 0.02            | 0.00            | 74.61   | 0.00 | 0.08  |
| NRNAGAS        | 2.07            | 0.03   | 0.01              | 0.00            | 0.00            | 8.23    | 0.00 | 0.01  |
| NROTHERS       | 0.00            | 0.00   | 0.00              | 0.00            | 0.00            | 0.00    | 0.00 | 0.00  |
| OPENFIRE       | 0.00            | 0.00   | 0.00              | 0.00            | 0.00            | 0.00    | 0.00 | 0.00  |
| ORDIESEL       | 89.53           | 2.19   | 2.63              | 2.45            | 0.18            | 34.06   | 1.58 | 0.79  |
| ORGASOLINE     | 276.49          | 211.64 | 2.35              | 5.11            | 16.44           | 4991.52 | 0.24 | 0.59  |
| OTHERCMB       | 80.83           | 4.04   | 7.42              | 88.79           | 4.46            | 152.98  | 0.01 | 3.87  |
| OTHERS         | 17.09           | 36.46  | 16.82             | 133.36          | 2.43            | 63.98   | 0.17 | 2.56  |
| PRESCR BURN    | 0.00            | 0.00   | 0.00              | 0.00            | 0.00            | 0.00    | 0.00 | 0.00  |
| RAILROAD       | 37.00           | 0.52   | 0.86              | 2.05            | 0.00            | 4.27    | 0.64 | 0.19  |
| SEASALT        | 0.00            | 0.00   | 0.00              | 0.00            | 0.00            | 0.00    | 0.00 | 0.00  |
| SOLVENT        | 3.32            | 438.88 | 3.38              | 30.87           | 0.11            | 0.68    | 0.08 | 2.50  |
| WILDFIRE       | 0.00            | 0.00   | 0.00              | 0.00            | 0.00            | 0.03    | 0.00 | 0.00  |
| WOODFUEL       | 0.00            | 0.00   | 0.00              | 0.00            | 0.00            | 0.01    | 0.00 | 0.00  |
| WOODSTOVE      | 2.50            | 55.82  | 25.30             | 0.38            | 0.00            | 185.42  | 2.73 | 14.31 |

**Table S8 (c)** Average daily a priori emissions estimates within a radius of approximate 54-km distance of Detroit site (tons/day)

| Category       | NO <sub>x</sub> | VOC    | PM <sub>2.5</sub> | SO <sub>2</sub> | NH <sub>3</sub> | CO      | PEC  | POA   |
|----------------|-----------------|--------|-------------------|-----------------|-----------------|---------|------|-------|
| AGRIBURN       | 0.00            | 0.00   | 0.00              | 0.00            | 0.00            | 0.00    | 0.00 | 0.00  |
| AIRCRAFT       | 4.65            | 0.98   | 0.09              | 0.44            | 0.00            | 11.69   | 0.06 | 0.03  |
| BIOGENIC       | 0.74            | 1.21   | 0.00              | 0.00            | 0.00            | 0.55    | 0.00 | 0.00  |
| COALCMB        | 156.40          | 1.48   | 13.28             | 443.41          | 0.01            | 17.82   | 0.13 | 2.66  |
| DIESELCMB      | 2.01            | 0.11   | 0.07              | 0.21            | 0.00            | 0.38    | 0.05 | 0.02  |
| DUST           | 0.00            | 0.00   | 11.96             | 0.00            | 0.40            | 0.00    | 0.06 | 0.81  |
| FUELOILCMB     | 129.22          | 0.12   | 0.97              | 369.65          | 0.13            | 1.39    | 0.13 | 0.07  |
| LIVESTOCK      | 0.00            | 0.00   | 0.00              | 0.00            | 8.44            | 0.00    | 0.00 | 0.00  |
| LPGCMB         | 1.05            | 0.04   | 0.06              | 0.03            | 0.00            | 0.24    | 0.00 | 0.03  |
| LWASTEBURN     | 2.18            | 5.53   | 7.58              | 0.01            | 0.00            | 72.18   | 0.30 | 4.80  |
| METALPRODUCT   | 3.53            | 1.37   | 2.61              | 3.21            | 0.00            | 53.41   | 0.02 | 0.43  |
| MEATCOOKING    | 0.00            | 0.53   | 2.85              | 0.00            | 0.00            | 1.17    | 0.03 | 2.74  |
| MEXCMB_M       | 0.00            | 0.00   | 0.00              | 0.00            | 0.00            | 0.00    | 0.00 | 0.00  |
| MINERALPRODUCT | 12.14           | 8.84   | 3.10              | 18.56           | 0.17            | 5.05    | 0.05 | 0.14  |
| NAGASCMB       | 134.96          | 2.80   | 9.47              | 54.77           | 0.56            | 36.39   | 0.00 | 5.68  |
| NRDIESEL       | 48.80           | 1.49   | 3.21              | 4.34            | 0.03            | 17.65   | 2.38 | 0.72  |
| NRFUELOIL      | 4.99            | 0.14   | 0.24              | 3.45            | 0.00            | 0.65    | 0.02 | 0.03  |
| NRGASOLINE     | 8.89            | 56.77  | 1.73              | 0.55            | 0.02            | 588.42  | 0.14 | 1.36  |
| NRLPG          | 12.94           | 3.24   | 0.06              | 0.01            | 0.00            | 50.91   | 0.00 | 0.05  |
| NRNAGAS        | 1.30            | 0.02   | 0.01              | 0.00            | 0.00            | 5.19    | 0.00 | 0.01  |
| NROTHERS       | 0.00            | 0.00   | 0.02              | 0.00            | 0.00            | 0.00    | 0.00 | 0.00  |
| OPENFIRE       | 0.00            | 0.00   | 0.00              | 0.00            | 0.00            | 0.00    | 0.00 | 0.00  |
| ORDIESEL       | 141.29          | 3.45   | 4.31              | 3.75            | 0.29            | 50.76   | 2.65 | 1.27  |
| ORGASOLINE     | 209.87          | 190.27 | 1.88              | 4.05            | 10.94           | 3875.01 | 0.23 | 0.58  |
| OTHERCMB       | 13.33           | 0.57   | 0.57              | 12.92           | 0.01            | 8.38    | 0.00 | 0.34  |
| OTHERS         | 9.12            | 11.23  | 1.70              | 3.87            | 3.32            | 10.09   | 0.03 | 0.17  |
| PRESCRUBURN    | 0.00            | 0.00   | 0.00              | 0.00            | 0.00            | 0.00    | 0.00 | 0.00  |
| RAILROAD       | 6.29            | 0.10   | 0.16              | 0.35            | 0.00            | 1.04    | 0.12 | 0.04  |
| SEASALT        | 0.00            | 0.00   | 0.00              | 0.00            | 0.00            | 0.00    | 0.00 | 0.00  |
| SOLVENT        | 0.50            | 285.68 | 0.54              | 0.06            | 0.00            | 0.34    | 0.03 | 0.28  |
| WILDFIRE       | 0.00            | 0.00   | 0.00              | 0.00            | 0.00            | 0.00    | 0.00 | 0.00  |
| WOODFUEL       | 0.01            | 0.00   | 0.08              | 0.00            | 0.00            | 0.10    | 0.01 | 0.03  |
| WOODSTOVE      | 2.74            | 53.15  | 28.16             | 0.41            | 0.05            | 202.49  | 3.03 | 15.93 |

**Table S8 (d)** Average daily a priori emissions estimates within a radius of approximate 54-km distance of Los Angeles site (tons/day)

| Category       | NO <sub>x</sub> | VOC    | PM <sub>2.5</sub> | SO <sub>2</sub> | NH <sub>3</sub> | CO      | PEC  | POA   |
|----------------|-----------------|--------|-------------------|-----------------|-----------------|---------|------|-------|
| AGRIBURN       | 0.00            | 0.00   | 0.00              | 0.00            | 0.00            | 0.01    | 0.00 | 0.00  |
| AIRCRAFT       | 1.33            | 0.28   | 0.03              | 0.13            | 0.00            | 3.73    | 0.02 | 0.01  |
| BIOGENIC       | 2.76            | 63.72  | 0.00              | 0.00            | 0.00            | 14.62   | 0.00 | 0.00  |
| COALCMB        | 0.04            | 0.05   | 0.01              | 0.06            | 0.00            | 1.05    | 0.00 | 0.00  |
| DIESEL CMB     | 0.00            | 0.00   | 0.00              | 0.00            | 0.00            | 0.00    | 0.00 | 0.00  |
| DUST           | 0.00            | 0.00   | 12.87             | 0.00            | 0.00            | 0.00    | 0.05 | 0.76  |
| FUELOIL CMB    | 17.45           | 0.95   | 4.43              | 2.96            | 0.00            | 1.44    | 0.37 | 0.18  |
| LIVESTOCK      | 0.00            | 0.00   | 0.00              | 0.00            | 9.26            | 0.00    | 0.00 | 0.00  |
| LPG CMB        | 1.76            | 0.11   | 0.97              | 0.12            | 0.00            | 0.39    | 0.00 | 0.58  |
| LWASTEBURN     | 1.76            | 4.46   | 6.87              | 0.00            | 0.00            | 63.61   | 0.27 | 4.60  |
| METALPRODUCT   | 0.08            | 0.06   | 0.16              | 0.00            | 0.00            | 0.11    | 0.00 | 0.03  |
| MEATCOOKING    | 0.00            | 1.06   | 9.79              | 0.00            | 0.00            | 0.00    | 0.12 | 9.53  |
| MEXCMB_M       | 0.00            | 0.00   | 0.00              | 0.00            | 0.00            | 0.00    | 0.00 | 0.00  |
| MINERALPRODUCT | 12.50           | 0.91   | 1.61              | 0.99            | 0.00            | 6.16    | 0.03 | 0.12  |
| NAGASCMB       | 55.29           | 6.76   | 6.91              | 0.60            | 0.04            | 16.99   | 0.00 | 4.14  |
| NRDIESEL       | 42.09           | 1.69   | 3.40              | 0.26            | 0.06            | 22.71   | 2.52 | 0.76  |
| NRFUELOIL      | 0.00            | 0.00   | 0.00              | 0.00            | 0.00            | 0.00    | 0.00 | 0.00  |
| NRGASOLINE     | 6.30            | 44.86  | 1.38              | 0.03            | 0.03            | 726.21  | 0.11 | 1.08  |
| NRLPG          | 8.05            | 2.01   | 0.04              | 0.01            | 0.00            | 31.57   | 0.00 | 0.03  |
| NRNAGAS        | 0.95            | 0.01   | 0.00              | 0.00            | 0.00            | 3.77    | 0.00 | 0.00  |
| NROTHERS       | 0.00            | 0.00   | 0.00              | 0.00            | 0.00            | 0.00    | 0.00 | 0.00  |
| OPENFIRE       | 0.00            | 0.00   | 0.00              | 0.00            | 0.00            | 0.00    | 0.00 | 0.00  |
| ORDIESEL       | 42.74           | 1.15   | 1.35              | 1.59            | 0.09            | 15.28   | 0.78 | 0.41  |
| ORGASOLINE     | 140.01          | 146.88 | 1.46              | 3.19            | 10.01           | 2119.82 | 0.15 | 0.38  |
| OTHERCMB       | 0.99            | 0.07   | 0.12              | 0.10            | 0.00            | 0.32    | 0.03 | 0.06  |
| OTHERS         | 0.26            | 8.70   | 4.70              | 0.05            | 2.34            | 1.14    | 0.17 | 2.93  |
| PRESCR BURN    | 0.00            | 0.03   | 0.26              | 0.00            | 0.00            | 1.33    | 0.04 | 0.20  |
| RAILROAD       | 24.46           | 0.33   | 0.56              | 0.07            | 0.00            | 2.71    | 0.41 | 0.13  |
| SEASALT        | 0.00            | 0.00   | 0.00              | 0.00            | 0.00            | 0.00    | 0.00 | 0.00  |
| SOLVENT        | 0.50            | 156.19 | 0.04              | 0.01            | 0.00            | 0.08    | 0.00 | 0.03  |
| WILDFIRE       | 0.00            | 0.00   | 0.00              | 0.00            | 0.00            | 0.00    | 0.00 | 0.00  |
| WOODFUEL       | 0.00            | 0.00   | 0.00              | 0.00            | 0.00            | 0.00    | 0.00 | 0.00  |
| WOODSTOVE      | 2.26            | 7.26   | 23.33             | 0.30            | 0.00            | 175.67  | 2.51 | 13.19 |

**Table S8 (e)** Average daily a priori emissions estimates within a radius of approximate 54-km distance of New York site (tons/day)

| Category       | NO <sub>x</sub> | VOC    | PM <sub>2.5</sub> | SO <sub>2</sub> | NH <sub>3</sub> | CO      | PEC  | POA   |
|----------------|-----------------|--------|-------------------|-----------------|-----------------|---------|------|-------|
| AGRIBURN       | 0.00            | 0.00   | 0.00              | 0.00            | 0.00            | 0.00    | 0.00 | 0.00  |
| AIRCRAFT       | 16.07           | 3.06   | 0.17              | 1.45            | 0.00            | 29.27   | 0.11 | 0.05  |
| BIOGENIC       | 0.36            | 1.47   | 0.00              | 0.00            | 0.00            | 0.57    | 0.00 | 0.00  |
| COALCMB        | 32.62           | 1.95   | 11.71             | 58.40           | 0.57            | 3.11    | 0.12 | 2.34  |
| DIESEL CMB     | 2.21            | 0.04   | 0.05              | 0.15            | 0.00            | 0.32    | 0.04 | 0.01  |
| DUST           | 0.00            | 0.00   | 10.67             | 0.00            | 0.00            | 0.00    | 0.07 | 0.86  |
| FUELOIL CMB    | 250.74          | 4.65   | 15.54             | 405.03          | 4.37            | 34.29   | 1.78 | 1.17  |
| LIVESTOCK      | 0.00            | 0.00   | 0.00              | 0.00            | 0.93            | 0.00    | 0.00 | 0.00  |
| LPG CMB        | 5.52            | 0.11   | 0.18              | 0.80            | 0.00            | 0.86    | 0.00 | 0.11  |
| LWASTEBURN     | 0.08            | 0.18   | 0.24              | 0.01            | 0.01            | 1.41    | 0.01 | 0.07  |
| METALPRODUCT   | 0.00            | 0.04   | 0.00              | 0.00            | 0.00            | 0.00    | 0.00 | 0.00  |
| MEATCOOKING    | 0.00            | 1.95   | 11.31             | 0.00            | 0.00            | 3.59    | 0.14 | 11.00 |
| MEXCMB_M       | 0.00            | 0.00   | 0.00              | 0.00            | 0.00            | 0.00    | 0.00 | 0.00  |
| MINERALPRODUCT | 0.07            | 0.04   | 0.12              | 0.02            | 0.00            | 0.20    | 0.00 | 0.01  |
| NAGASCMB       | 237.89          | 19.58  | 13.02             | 171.52          | 1.20            | 68.06   | 0.00 | 7.81  |
| NRDIESEL       | 88.45           | 3.56   | 8.08              | 11.73           | 0.11            | 46.11   | 5.99 | 1.81  |
| NRFUELOIL      | 1.63            | 0.04   | 0.07              | 0.95            | 0.00            | 0.21    | 0.01 | 0.01  |
| NRGASOLINE     | 17.74           | 109.05 | 3.22              | 0.25            | 0.06            | 1528.22 | 0.26 | 2.53  |
| NRLPG          | 28.21           | 6.97   | 0.13              | 0.03            | 0.00            | 109.07  | 0.00 | 0.11  |
| NRNAGAS        | 3.87            | 0.06   | 0.02              | 0.00            | 0.00            | 15.29   | 0.00 | 0.02  |
| NROTHERS       | 0.00            | 0.00   | 0.00              | 0.00            | 0.00            | 0.00    | 0.00 | 0.00  |
| OPENFIRE       | 3.28            | 8.01   | 11.14             | 0.00            | 0.00            | 110.71  | 0.45 | 7.46  |
| ORDIESEL       | 196.52          | 4.79   | 5.72              | 6.95            | 0.42            | 72.70   | 3.36 | 1.69  |
| ORGASOLINE     | 442.50          | 369.50 | 3.87              | 8.15            | 25.09           | 7863.88 | 0.43 | 1.06  |
| OTHERCMB       | 7.83            | 1.86   | 0.51              | 1.72            | 0.02            | 3.72    | 0.16 | 0.19  |
| OTHERS         | 22.52           | 167.42 | 4.88              | 11.19           | 19.20           | 12.81   | 0.10 | 0.27  |
| PRESCR BURN    | 0.00            | 0.00   | 0.00              | 0.00            | 0.00            | 0.00    | 0.00 | 0.00  |
| RAILROAD       | 3.91            | 0.09   | 0.15              | 0.25            | 0.00            | 1.73    | 0.11 | 0.03  |
| SEASALT        | 0.00            | 0.00   | 0.57              | 0.00            | 0.00            | 0.00    | 0.00 | 0.00  |
| SOLVENT        | 1.86            | 498.77 | 0.67              | 0.42            | 0.01            | 0.45    | 0.01 | 0.61  |
| WILDFIRE       | 0.00            | 0.00   | 0.00              | 0.00            | 0.00            | 0.00    | 0.00 | 0.00  |
| WOODFUEL       | 0.37            | 0.01   | 0.24              | 0.02            | 0.00            | 10.21   | 0.03 | 0.09  |
| WOODSTOVE      | 1.10            | 58.12  | 12.12             | 0.17            | 0.12            | 101.17  | 1.31 | 6.86  |



**Table S8 (f)** Average daily a priori emissions estimates within a radius of approximate 54-km distance of Pittsburgh site (tons/day)

| Category       | NO <sub>x</sub> | VOC    | PM <sub>2.5</sub> | SO <sub>2</sub> | NH <sub>3</sub> | CO      | PEC  | POA   |
|----------------|-----------------|--------|-------------------|-----------------|-----------------|---------|------|-------|
| AGRIBURN       | 0.00            | 0.00   | 0.00              | 0.00            | 0.00            | 0.00    | 0.00 | 0.00  |
| AIRCRAFT       | 3.21            | 0.73   | 0.08              | 0.31            | 0.00            | 9.26    | 0.05 | 0.02  |
| BIOGENIC       | 0.55            | 2.54   | 0.00              | 0.00            | 0.00            | 0.92    | 0.00 | 0.00  |
| COALCMB        | 437.51          | 2.69   | 59.71             | 1338.95         | 0.02            | 34.61   | 0.60 | 11.94 |
| DIESELCMB      | 0.37            | 0.02   | 0.01              | 0.03            | 0.00            | 0.11    | 0.01 | 0.00  |
| DUST           | 0.00            | 0.00   | 9.08              | 0.00            | 0.00            | 0.00    | 0.06 | 0.74  |
| FUEOILCMB      | 153.42          | 0.43   | 0.73              | 558.02          | 0.02            | 1.71    | 0.12 | 0.05  |
| LIVESTOCK      | 0.00            | 0.00   | 0.00              | 0.00            | 2.51            | 0.00    | 0.00 | 0.00  |
| LPGCMB         | 0.38            | 0.02   | 0.02              | 0.00            | 0.00            | 0.07    | 0.00 | 0.01  |
| LWASTEBURN     | 2.53            | 6.44   | 8.22              | 0.07            | 0.02            | 75.51   | 0.32 | 4.70  |
| METALPRODUCT   | 31.76           | 3.95   | 25.38             | 25.82           | 0.40            | 227.46  | 0.04 | 4.88  |
| MEATCOOKING    | 0.00            | 0.29   | 1.67              | 0.00            | 0.00            | 0.69    | 0.02 | 1.62  |
| MEXCMB_M       | 0.00            | 0.00   | 0.00              | 0.00            | 0.00            | 0.00    | 0.00 | 0.00  |
| MINERALPRODUCT | 16.24           | 0.53   | 3.09              | 11.83           | 0.00            | 1.99    | 0.06 | 0.18  |
| NAGASCMB       | 93.51           | 1.44   | 3.49              | 145.92          | 0.21            | 24.51   | 0.00 | 2.09  |
| NRDIESEL       | 59.35           | 1.13   | 3.19              | 4.20            | 0.02            | 14.58   | 2.36 | 0.71  |
| NRFUELOIL      | 10.87           | 0.30   | 0.45              | 6.00            | 0.00            | 1.43    | 0.04 | 0.05  |
| NRGASOLINE     | 2.37            | 22.44  | 0.61              | 0.07            | 0.01            | 266.45  | 0.05 | 0.48  |
| NRLPG          | 5.72            | 1.43   | 0.03              | 0.01            | 0.00            | 22.43   | 0.00 | 0.02  |
| NRNAGAS        | 0.66            | 0.01   | 0.00              | 0.00            | 0.00            | 2.64    | 0.00 | 0.00  |
| NROTHERS       | 0.00            | 0.00   | 0.00              | 0.00            | 0.00            | 0.00    | 0.00 | 0.00  |
| OPENFIRE       | 0.07            | 0.18   | 0.25              | 0.00            | 0.00            | 2.48    | 0.01 | 0.17  |
| ORDIESEL       | 51.34           | 1.23   | 1.55              | 1.89            | 0.11            | 18.48   | 0.91 | 0.46  |
| ORGASOLINE     | 100.94          | 85.78  | 0.81              | 1.72            | 5.25            | 1765.17 | 0.09 | 0.23  |
| OTHERCMB       | 26.57           | 0.40   | 4.74              | 25.81           | 0.08            | 11.20   | 0.03 | 2.34  |
| OTHERS         | 2.88            | 17.80  | 1.85              | 1.33            | 3.75            | 12.72   | 0.02 | 0.24  |
| PRESCRUBURN    | 0.00            | 0.00   | 0.00              | 0.00            | 0.00            | 0.00    | 0.00 | 0.00  |
| RAILROAD       | 14.32           | 0.21   | 0.33              | 0.78            | 0.00            | 1.67    | 0.25 | 0.07  |
| SEASALT        | 0.00            | 0.00   | 0.00              | 0.00            | 0.00            | 0.00    | 0.00 | 0.00  |
| SOLVENT        | 0.19            | 100.54 | 0.19              | 0.07            | 0.00            | 0.12    | 0.02 | 0.09  |
| WILDFIRE       | 0.00            | 0.00   | 0.00              | 0.00            | 0.00            | 0.01    | 0.00 | 0.00  |
| WOODFUEL       | 0.00            | 0.00   | 0.00              | 0.00            | 0.00            | 0.01    | 0.00 | 0.00  |
| WOODSTOVE      | 1.30            | 24.48  | 13.76             | 0.20            | 0.00            | 101.76  | 1.48 | 7.78  |

**Table S9 (a)** Calculated  $R_j$  for each measurement day at Atlanta site

| Category       | 1/4/04 | 1/7/04 | 1/10/04 | 1/13/04 | 1/16/04 | 1/19/04 | 1/22/04 |
|----------------|--------|--------|---------|---------|---------|---------|---------|
| AGRIBURN       | 0.100  | 0.733  | 0.307   | 0.171   | 0.404   | 0.762   | 0.313   |
| AIRCRAFT       | 0.914  | 0.894  | 0.974   | 0.922   | 0.812   | 1.002   | 0.915   |
| BIOGENIC       | 1.001  | 0.996  | 1.002   | 0.980   | 0.985   | 1.002   | 0.999   |
| COALCMB        | 0.921  | 0.936  | 0.947   | 0.903   | 0.896   | 0.856   | 0.945   |
| DIESEL CMB     | 1.000  | 1.000  | 1.000   | 1.000   | 1.000   | 1.000   | 1.000   |
| DUST           | 0.100  | 0.100  | 0.100   | 0.100   | 0.100   | 0.100   | 0.100   |
| FUELOILCMB     | 0.786  | 0.875  | 0.967   | 0.769   | 0.756   | 0.888   | 0.887   |
| LIVESTOCK      | 0.998  | 0.992  | 1.004   | 0.957   | 0.944   | 1.009   | 0.990   |
| LPGCMB         | 1.000  | 1.000  | 1.000   | 1.000   | 0.999   | 1.000   | 1.000   |
| LWASTEBURN     | 0.100  | 0.100  | 0.100   | 0.100   | 0.100   | 0.100   | 0.100   |
| METALPRODUCT   | 0.945  | 0.960  | 0.752   | 0.504   | 0.886   | 0.684   | 0.765   |
| MEATCOOKING    | 1.000  | 0.984  | 0.923   | 0.921   | 0.940   | 0.884   | 0.940   |
| MEXCMB_M       | 1.000  | 1.000  | 1.000   | 0.998   | 0.999   | 1.000   | 1.000   |
| MINERALPRODUCT | 0.817  | 0.936  | 0.862   | 0.753   | 0.877   | 0.834   | 0.818   |
| NAGASCMB       | 0.454  | 0.447  | 0.259   | 0.264   | 0.336   | 0.403   | 0.259   |
| NRDIESEL       | 0.984  | 0.973  | 0.996   | 0.987   | 0.956   | 1.002   | 0.976   |
| NRFUELOIL      | 0.998  | 1.000  | 1.000   | 0.998   | 0.998   | 0.999   | 0.999   |
| NRGASOLINE     | 0.994  | 0.997  | 1.001   | 0.994   | 0.977   | 0.998   | 0.996   |
| NRLPG          | 1.000  | 1.001  | 1.000   | 1.000   | 1.001   | 1.000   | 1.000   |
| NRNAGAS        | 1.000  | 1.000  | 1.000   | 1.000   | 1.000   | 1.000   | 1.000   |
| NROTHERS       | 1.000  | 1.000  | 1.000   | 1.000   | 0.999   | 1.000   | 1.000   |
| OPENFIRE       | 0.100  | 0.257  | 0.100   | 0.143   | 0.100   | 0.141   | 0.102   |
| ORDIESEL       | 0.906  | 0.957  | 0.957   | 0.863   | 0.840   | 0.962   | 0.921   |
| ORGASOLINE     | 0.641  | 0.734  | 0.901   | 0.482   | 0.444   | 0.753   | 0.753   |
| OTHERCMB       | 0.468  | 0.992  | 0.976   | 0.950   | 0.974   | 0.917   | 0.983   |
| OTHERS         | 0.386  | 0.671  | 0.453   | 0.352   | 0.404   | 0.384   | 0.394   |
| PRESCR BURN    | 0.100  | 1.080  | 0.432   | 0.305   | 0.347   | 0.763   | 0.434   |
| RAILROAD       | 0.997  | 0.999  | 0.999   | 1.000   | 1.001   | 1.001   | 0.996   |
| SEASALT        | 0.982  | 0.994  | 0.981   | 0.976   | 0.993   | 0.997   | 0.986   |
| SOLVENT        | 0.941  | 0.995  | 0.987   | 0.901   | 0.867   | 0.844   | 0.984   |
| WILDFIRE       | 0.439  | 0.949  | 0.587   | 0.703   | 0.647   | 0.924   | 0.636   |
| WOODFUEL       | 0.756  | 0.997  | 0.955   | 0.974   | 0.935   | 0.746   | 0.972   |
| WOODSTOVE      | 0.100  | 0.100  | 0.100   | 0.100   | 0.100   | 0.100   | 0.100   |

**Table S9. (b)** Calculated  $R_j$  for each measurement day at Chicago site

| Category        | 1/4/04 | 1/19/04 | 1/25/04 | 1/28/04 |
|-----------------|--------|---------|---------|---------|
| AGRIBURN        | 0.994  | 0.972   | 1.000   | 0.991   |
| AIRCRAFT        | 1.000  | 0.998   | 0.999   | 0.999   |
| BIOGENIC        | 1.000  | 0.999   | 1.000   | 1.000   |
| COALCMB         | 0.954  | 0.927   | 0.960   | 0.921   |
| DIESEL CMB      | 1.000  | 1.000   | 1.000   | 1.000   |
| DUST            | 0.100  | 0.100   | 0.100   | 0.100   |
| FUELOIL CMB     | 0.831  | 0.606   | 0.719   | 0.685   |
| LIVESTOCK       | 0.998  | 0.982   | 0.958   | 0.964   |
| LPG CMB         | 1.000  | 0.999   | 0.999   | 0.999   |
| LWASTE BURN     | 0.100  | 0.100   | 0.229   | 0.154   |
| METAL PRODUCT   | 0.112  | 0.227   | 0.111   | 0.247   |
| MEAT COOKING    | 0.439  | 0.536   | 0.537   | 0.549   |
| MEX CMB_M       | 1.000  | 0.999   | 1.000   | 1.000   |
| MINERAL PRODUCT | 0.681  | 0.758   | 0.750   | 0.751   |
| NAGAS CMB       | 0.182  | 0.330   | 0.244   | 0.267   |
| NR DIESEL       | 0.978  | 0.966   | 0.970   | 0.951   |
| NR FUELOIL      | 0.989  | 0.972   | 0.971   | 0.980   |
| NR GASOLINE     | 0.996  | 0.986   | 0.989   | 0.991   |
| NR LPG          | 1.000  | 0.999   | 1.000   | 0.999   |
| NR NAGAS        | 1.000  | 0.999   | 1.000   | 1.000   |
| NR OTHERS       | 1.000  | 0.999   | 1.000   | 1.000   |
| OPEN FIRE       | 1.000  | 0.982   | 1.000   | 0.992   |
| OR DIESEL       | 0.970  | 0.959   | 0.968   | 0.939   |
| OR GASOLINE     | 0.763  | 0.611   | 0.731   | 0.607   |
| OTHER CMB       | 0.476  | 0.644   | 0.533   | 0.708   |
| OTHERS          | 0.149  | 0.168   | 0.169   | 0.121   |
| PRESCR BURN     | 1.000  | 0.965   | 1.000   | 0.978   |
| RAILROAD        | 0.996  | 0.995   | 0.993   | 0.987   |
| SEASALT         | 0.997  | 0.999   | 1.000   | 1.000   |
| SOLVENT         | 0.601  | 0.637   | 0.320   | 0.384   |
| WILDFIRE        | 0.996  | 0.962   | 0.997   | 0.925   |
| WOODFUEL        | 0.945  | 0.873   | 0.983   | 0.962   |
| WOODSTOVE       | 0.100  | 0.100   | 0.129   | 0.100   |

**Table S9. (c)** Calculated  $R_j$  for each measurement day at Detroit site

| Category        | 1/4/04 | 1/7/04 | 1/10/04 | 1/13/04 | 1/16/04 | 1/19/04 | 1/22/04 | 1/28/04 |
|-----------------|--------|--------|---------|---------|---------|---------|---------|---------|
| AGRIBURN        | 0.972  | 0.975  | 1.000   | 0.986   | 1.000   | 0.951   | 0.522   | 0.949   |
| AIRCRAFT        | 0.988  | 0.999  | 1.000   | 0.997   | 0.992   | 0.988   | 0.995   | 1.000   |
| BIOGENIC        | 0.917  | 1.000  | 1.000   | 0.995   | 1.000   | 0.988   | 0.996   | 1.002   |
| COALCMB         | 0.979  | 0.967  | 0.978   | 0.948   | 0.985   | 0.928   | 0.963   | 0.974   |
| DIESEL CMB      | 0.998  | 1.000  | 1.000   | 0.999   | 0.999   | 0.998   | 0.998   | 1.000   |
| DUST            | 0.100  | 0.100  | 0.100   | 0.100   | 0.100   | 0.100   | 0.100   | 0.100   |
| FUELOIL CMB     | 0.916  | 0.709  | 0.842   | 0.842   | 0.744   | 0.382   | 0.744   | 0.908   |
| LIVESTOCK       | 0.993  | 0.983  | 0.993   | 1.011   | 1.000   | 0.938   | 0.966   | 1.009   |
| LPG CMB         | 0.996  | 0.995  | 1.000   | 1.000   | 0.999   | 0.991   | 0.997   | 1.000   |
| LWASTE BURN     | 0.100  | 0.100  | 0.264   | 0.100   | 0.103   | 0.100   | 0.100   | 0.100   |
| METAL PRODUCT   | 0.772  | 0.633  | 0.786   | 0.525   | 0.719   | 0.733   | 0.548   | 0.452   |
| MEAT COOKING    | 0.128  | 0.916  | 1.014   | 0.429   | 0.487   | 0.286   | 0.280   | 0.325   |
| MEX CMB_M       | 1.000  | 1.000  | 1.000   | 1.000   | 1.000   | 0.997   | 0.997   | 1.000   |
| MINERAL PRODUCT | 0.839  | 0.883  | 0.920   | 0.803   | 0.943   | 0.868   | 0.865   | 0.854   |
| NAGA CMB        | 0.302  | 0.582  | 0.603   | 0.321   | 0.345   | 0.346   | 0.170   | 0.202   |
| NR DIESEL       | 0.826  | 0.992  | 1.006   | 0.900   | 0.803   | 0.819   | 0.938   | 1.004   |
| NR FUELOIL      | 0.989  | 0.990  | 0.991   | 0.995   | 0.972   | 0.908   | 0.987   | 0.996   |
| NR GASOLINE     | 0.733  | 1.000  | 1.003   | 0.978   | 0.980   | 0.880   | 0.987   | 1.006   |
| NR LPG          | 0.993  | 0.999  | 1.000   | 0.999   | 0.999   | 0.990   | 0.997   | 1.000   |
| NR NAGA S       | 0.999  | 0.999  | 1.000   | 1.000   | 1.000   | 0.997   | 0.997   | 1.000   |
| NR OTHERS       | 0.999  | 1.000  | 1.000   | 0.999   | 1.000   | 0.997   | 0.999   | 0.999   |
| OPEN FIRE       | 0.999  | 0.999  | 1.000   | 0.994   | 1.000   | 0.952   | 0.950   | 0.668   |
| OR DIESEL       | 0.796  | 0.999  | 1.003   | 0.789   | 0.787   | 0.723   | 0.902   | 0.990   |
| OR GASOLINE     | 0.817  | 0.867  | 0.876   | 0.496   | 0.638   | 0.541   | 0.782   | 0.936   |
| OTHER CMB       | 0.882  | 0.944  | 0.975   | 0.872   | 0.959   | 0.808   | 0.864   | 0.845   |
| OTHERS          | 0.458  | 0.519  | 0.770   | 0.343   | 0.490   | 0.378   | 0.346   | 0.374   |
| PRESCR BURN     | 0.993  | 0.980  | 1.000   | 0.989   | 1.000   | 0.922   | 0.891   | 0.993   |
| RAILROAD        | 0.984  | 0.997  | 1.001   | 0.995   | 0.989   | 0.971   | 0.995   | 1.000   |
| SEASALT         | 1.000  | 1.000  | 1.000   | 0.999   | 1.000   | 0.999   | 0.998   | 0.992   |
| SOLVENT         | 0.733  | 0.737  | 0.944   | 0.661   | 0.590   | 0.724   | 0.687   | 0.921   |
| WILDFIRE        | 0.972  | 0.935  | 1.000   | 0.942   | 1.000   | 0.915   | 0.728   | 0.846   |
| WOODFUEL        | 0.913  | 0.963  | 0.993   | 0.898   | 0.979   | 0.836   | 0.939   | 0.931   |
| WOODSTOVE       | 0.100  | 0.100  | 0.100   | 0.100   | 0.100   | 0.100   | 0.100   | 0.100   |

**Table S9. (d)** Calculated  $R_j$  for each measurement day at Los Angeles site

| Category        | 1/7/04 | 1/10/04 | 1/13/04 | 1/19/04 | 1/22/04 | 1/25/04 | 1/28/04 |
|-----------------|--------|---------|---------|---------|---------|---------|---------|
| AGRIBURN        | 0.834  | 0.993   | 0.614   | 0.652   | 0.764   | 0.515   | 0.381   |
| AIRCRAFT        | 0.997  | 0.998   | 1.000   | 1.001   | 0.997   | 1.013   | 1.000   |
| BIOGENIC        | 0.981  | 1.013   | 0.975   | 1.032   | 0.808   | 0.999   | 1.006   |
| COALCMB         | 0.998  | 0.976   | 0.998   | 0.998   | 0.986   | 0.999   | 0.999   |
| DIESEL CMB      | 1.000  | 1.000   | 1.000   | 1.000   | 0.999   | 1.004   | 1.000   |
| DUST            | 0.100  | 0.174   | 0.116   | 0.100   | 0.606   | 0.100   | 0.100   |
| FUELOIL CMB     | 0.189  | 0.284   | 0.648   | 0.622   | 0.398   | 0.644   | 0.675   |
| LIVESTOCK       | 0.997  | 0.881   | 1.004   | 1.005   | 0.801   | 1.011   | 1.003   |
| LPG CMB         | 0.875  | 0.929   | 0.989   | 1.008   | 0.954   | 1.009   | 1.001   |
| LWASTEBURN      | 0.100  | 0.100   | 0.100   | 0.100   | 0.100   | 0.100   | 0.100   |
| METAL PRODUCT   | 0.955  | 0.990   | 0.985   | 0.931   | 0.983   | 0.970   | 0.961   |
| MEAT COOKING    | 0.190  | 0.259   | 0.316   | 0.312   | 0.164   | 0.415   | 0.255   |
| MEXCMB_M        | 0.956  | 0.998   | 0.993   | 1.001   | 0.998   | 1.010   | 0.999   |
| MINERAL PRODUCT | 0.715  | 0.853   | 0.929   | 0.611   | 0.888   | 0.514   | 0.709   |
| NAGAS CMB       | 0.206  | 0.244   | 0.362   | 0.289   | 0.347   | 0.256   | 0.209   |
| NRDIESEL        | 0.882  | 0.965   | 1.007   | 0.986   | 0.944   | 1.035   | 1.015   |
| NRFUELOIL       | 0.990  | 1.000   | 1.000   | 1.002   | 0.998   | 1.019   | 0.996   |
| NRGASOLINE      | 0.981  | 0.986   | 0.997   | 1.024   | 0.943   | 1.012   | 1.005   |
| NRLPG           | 0.997  | 1.000   | 1.000   | 1.000   | 1.006   | 1.011   | 1.000   |
| NRNAGAS         | 0.999  | 1.000   | 1.000   | 1.000   | 0.999   | 1.010   | 0.999   |
| NROTHERS        | 1.000  | 1.000   | 1.000   | 1.000   | 1.001   | 0.991   | 1.001   |
| OPENFIRE        | 0.992  | 1.000   | 1.000   | 1.001   | 0.972   | 1.262   | 0.988   |
| ORDIESEL        | 0.867  | 0.936   | 0.991   | 0.960   | 0.965   | 0.976   | 0.996   |
| ORGASOLINE      | 0.554  | 0.756   | 0.880   | 0.617   | 0.674   | 0.670   | 0.808   |
| OTHER CMB       | 0.972  | 0.998   | 0.999   | 0.915   | 0.989   | 0.834   | 0.825   |
| OTHERS          | 0.408  | 0.522   | 0.724   | 0.325   | 0.375   | 0.342   | 0.385   |
| PRESCR BURN     | 0.862  | 0.730   | 4.070   | 0.825   | 0.542   | 1.100   | 0.789   |
| RAILROAD        | 0.974  | 0.977   | 1.003   | 0.998   | 0.981   | 1.016   | 1.003   |
| SEASALT         | 0.985  | 0.994   | 0.993   | 1.000   | 0.994   | 0.978   | 0.943   |
| SOLVENT         | 0.997  | 1.011   | 1.004   | 0.879   | 0.993   | 0.897   | 0.940   |
| WILDFIRE        | 0.985  | 1.000   | 0.999   | 1.002   | 0.952   | 4.653   | 0.979   |
| WOODFUEL        | 0.999  | 1.000   | 1.000   | 0.962   | 0.986   | 0.980   | 0.990   |
| WOODSTOVE       | 0.100  | 0.100   | 0.100   | 0.100   | 0.100   | 0.100   | 0.100   |

**Table S9. (e)** Calculated  $R_j$  for each measurement day at New York site

| Category        | 1/4/04 | 1/7/04 | 1/10/04 | 1/13/04 | 1/16/04 | 1/19/04 | 1/22/04 | 1/25/04 | 1/28/04 |
|-----------------|--------|--------|---------|---------|---------|---------|---------|---------|---------|
| AGRIBURN        | 0.557  | 0.995  | 1.000   | 0.637   | 1.000   | 0.954   | 0.964   | 1.000   | 0.947   |
| AIRCRAFT        | 1.000  | 1.000  | 1.000   | 0.999   | 0.998   | 0.993   | 1.000   | 1.000   | 1.000   |
| BIOGENIC        | 1.004  | 0.999  | 1.000   | 0.961   | 0.995   | 0.884   | 0.997   | 0.997   | 0.999   |
| COALCMB         | 0.752  | 0.982  | 0.998   | 0.779   | 0.895   | 0.899   | 0.801   | 0.879   | 0.959   |
| DIESEL CMB      | 1.000  | 1.000  | 1.000   | 1.000   | 1.000   | 0.999   | 1.000   | 1.000   | 1.000   |
| DUST            | 0.100  | 0.108  | 0.424   | 0.100   | 0.100   | 0.100   | 0.100   | 0.100   | 0.100   |
| FUELOIL CMB     | 0.831  | 0.900  | 1.413   | 0.646   | 0.502   | 0.503   | 0.646   | 0.506   | 0.803   |
| LIVESTOCK       | 0.996  | 0.996  | 1.001   | 0.966   | 0.988   | 0.978   | 0.993   | 0.982   | 0.995   |
| LPG CMB         | 1.000  | 1.000  | 1.000   | 0.999   | 0.998   | 0.990   | 1.000   | 0.999   | 1.000   |
| LWASTEBURN      | 0.112  | 0.100  | 0.579   | 0.100   | 0.345   | 0.114   | 0.218   | 0.197   | 0.100   |
| METAL PRODUCT   | 0.817  | 0.916  | 1.000   | 0.728   | 0.946   | 0.935   | 0.865   | 0.978   | 0.850   |
| MEAT COOKING    | 0.744  | 0.549  | 0.983   | 0.299   | 0.174   | 0.100   | 0.679   | 0.186   | 0.310   |
| MEX CMB_M       | 1.000  | 1.000  | 1.000   | 0.999   | 1.000   | 0.999   | 1.000   | 1.000   | 1.000   |
| MINERAL PRODUCT | 0.789  | 0.971  | 0.999   | 0.751   | 0.976   | 0.938   | 0.885   | 0.979   | 0.949   |
| NAGAS CMB       | 0.471  | 0.492  | 0.832   | 0.339   | 0.691   | 0.319   | 0.488   | 0.300   | 0.258   |
| NR DIESEL       | 1.016  | 1.022  | 1.015   | 0.981   | 0.901   | 0.708   | 1.018   | 0.975   | 1.019   |
| NR FUELOIL      | 0.999  | 1.000  | 1.001   | 0.999   | 0.999   | 0.996   | 0.998   | 0.999   | 1.000   |
| NR GASOLINE     | 1.003  | 0.998  | 1.003   | 0.960   | 0.908   | 0.673   | 0.995   | 0.951   | 1.001   |
| NR LPG          | 1.000  | 1.000  | 1.000   | 1.001   | 0.995   | 0.978   | 1.001   | 1.000   | 1.000   |
| NR NAGAS        | 1.000  | 1.000  | 1.000   | 1.000   | 0.999   | 0.996   | 1.000   | 1.000   | 1.000   |
| NR OTHERS       | 1.000  | 1.000  | 1.000   | 1.000   | 1.000   | 0.999   | 1.000   | 1.000   | 1.000   |
| OPEN FIRE       | 0.100  | 0.100  | 0.172   | 0.100   | 0.100   | 0.100   | 0.143   | 0.100   | 0.100   |
| OR DIESEL       | 0.949  | 1.016  | 1.025   | 0.919   | 0.909   | 0.760   | 0.959   | 0.940   | 0.990   |
| OR GASOLINE     | 0.694  | 1.061  | 1.068   | 0.566   | 0.722   | 0.672   | 0.630   | 0.702   | 0.890   |
| OTHER CMB       | 0.896  | 0.979  | 1.001   | 0.919   | 0.950   | 0.898   | 0.907   | 0.950   | 0.947   |
| OTHERS          | 0.326  | 0.647  | 0.959   | 0.285   | 0.442   | 0.375   | 0.246   | 0.317   | 0.390   |
| PRESCR BURN     | 0.350  | 0.998  | 1.000   | 0.572   | 1.000   | 0.954   | 0.310   | 1.000   | 0.983   |
| RAILROAD        | 1.001  | 1.000  | 1.001   | 1.012   | 0.999   | 0.998   | 1.001   | 0.997   | 1.000   |
| SEASALT         | 0.997  | 0.975  | 1.003   | 0.973   | 0.999   | 0.995   | 0.996   | 1.000   | 0.991   |
| SOLVENT         | 0.824  | 0.986  | 0.998   | 0.819   | 0.962   | 0.771   | 0.667   | 0.960   | 0.984   |
| WILDFIRE        | 0.858  | 0.943  | 1.000   | 0.863   | 1.000   | 0.969   | 0.969   | 1.000   | 0.987   |
| WOOD FUEL       | 0.847  | 0.989  | 1.004   | 0.903   | 0.838   | 0.868   | 0.949   | 0.854   | 0.966   |
| WOODSTOVE       | 0.100  | 0.153  | 0.282   | 0.100   | 0.100   | 0.100   | 0.110   | 0.100   | 0.100   |

**Table S9. (f)** Calculated  $R_j$  for each measurement day at Pittsburgh site

| Category        | 1/4/04 | 1/7/04 | 1/10/04 | 1/13/04 | 1/19/04 | 1/22/04 | 1/25/04 | 1/28/04 |
|-----------------|--------|--------|---------|---------|---------|---------|---------|---------|
| AGRIBURN        | 0.645  | 0.988  | 1.000   | 0.765   | 0.981   | 0.724   | 1.000   | 0.991   |
| AIRCRAFT        | 0.891  | 1.001  | 0.998   | 0.999   | 0.998   | 0.998   | 0.998   | 1.000   |
| BIOGENIC        | 0.384  | 1.001  | 0.999   | 0.978   | 0.990   | 1.000   | 1.000   | 1.001   |
| COALCMB         | 0.924  | 0.968  | 0.902   | 0.811   | 0.920   | 0.878   | 0.787   | 0.939   |
| DIESEL CMB      | 0.991  | 1.000  | 1.000   | 1.000   | 1.000   | 1.000   | 1.000   | 1.000   |
| DUST            | 0.100  | 0.100  | 0.100   | 0.100   | 0.100   | 0.100   | 0.100   | 0.100   |
| FUELOIL CMB     | 0.872  | 1.056  | 0.514   | 0.923   | 0.857   | 0.885   | 0.822   | 0.988   |
| LIVESTOCK       | 1.000  | 1.031  | 0.995   | 0.983   | 0.992   | 1.015   | 0.970   | 1.027   |
| LPG CMB         | 0.978  | 1.000  | 1.000   | 1.000   | 1.000   | 1.000   | 1.000   | 1.000   |
| LWASTE BURN     | 0.100  | 0.116  | 0.100   | 0.100   | 0.100   | 0.100   | 0.100   | 0.100   |
| METAL PRODUCT   | 0.622  | 0.787  | 0.788   | 0.472   | 0.334   | 0.435   | 0.494   | 0.458   |
| MEAT COOKING    | 0.100  | 0.976  | 0.928   | 0.649   | 0.353   | 0.610   | 0.671   | 0.673   |
| MEX CMB_M       | 1.000  | 1.000  | 1.000   | 0.999   | 1.000   | 1.000   | 1.000   | 1.000   |
| MINERAL PRODUCT | 0.816  | 0.940  | 0.893   | 0.603   | 0.784   | 0.797   | 0.681   | 0.867   |
| NAGAS CMB       | 0.230  | 0.825  | 0.678   | 0.441   | 0.265   | 0.394   | 0.491   | 0.398   |
| NR DIESEL       | 0.352  | 1.016  | 0.967   | 0.974   | 0.955   | 0.960   | 0.949   | 1.011   |
| NRFUELOIL       | 0.792  | 1.002  | 0.947   | 0.995   | 0.976   | 0.985   | 0.967   | 0.996   |
| NR GASOLINE     | 0.373  | 1.002  | 0.989   | 0.987   | 0.979   | 0.997   | 0.990   | 1.004   |
| NRLPG           | 0.962  | 1.000  | 1.000   | 1.000   | 0.999   | 1.000   | 1.000   | 1.000   |
| NRNAGAS         | 0.995  | 1.000  | 1.000   | 1.000   | 1.000   | 1.000   | 1.000   | 1.000   |
| NROTHERS        | 1.000  | 1.000  | 1.000   | 1.000   | 1.000   | 1.000   | 1.000   | 1.000   |
| OPEN FIRE       | 0.739  | 0.816  | 0.771   | 0.596   | 0.269   | 0.140   | 0.514   | 0.367   |
| ORDIESEL        | 0.629  | 1.011  | 0.983   | 0.945   | 0.963   | 0.978   | 0.946   | 1.002   |
| ORGASOLINE      | 0.731  | 1.053  | 0.904   | 0.763   | 0.871   | 0.925   | 0.758   | 1.027   |
| OTHER CMB       | 0.801  | 0.985  | 0.970   | 0.870   | 0.786   | 0.876   | 0.954   | 0.860   |
| OTHERS          | 0.313  | 1.045  | 0.754   | 0.417   | 0.464   | 0.467   | 0.437   | 0.546   |
| PRESCR BURN     | 0.654  | 1.022  | 1.000   | 0.908   | 0.988   | 0.896   | 0.953   | 0.999   |
| RAILROAD        | 0.885  | 1.002  | 0.999   | 0.997   | 0.996   | 0.999   | 0.996   | 1.001   |
| SEASALT         | 1.000  | 1.000  | 1.000   | 0.996   | 0.995   | 0.998   | 1.000   | 0.997   |
| SOLVENT         | 0.768  | 1.029  | 0.978   | 0.833   | 0.971   | 0.844   | 0.937   | 0.966   |
| WILDFIRE        | 0.542  | 0.975  | 1.000   | 0.848   | 0.949   | 0.856   | 0.998   | 0.855   |
| WOODFUEL        | 0.937  | 0.998  | 0.999   | 0.962   | 0.986   | 0.974   | 0.980   | 0.979   |
| WOODSTOVE       | 0.100  | 0.296  | 0.287   | 0.124   | 0.100   | 0.100   | 0.100   | 0.100   |

**Table S10. (a) Initial and refined source impacts in percentage contributions at Atlanta site**

| Category       | 1/4/04 |        | 1/7/04 |        | 1/10/04 |        | 1/13/04 |        | 1/16/04 |        | 1/19/04 |        | 1/22/04 |        |
|----------------|--------|--------|--------|--------|---------|--------|---------|--------|---------|--------|---------|--------|---------|--------|
|                | Init.  | Refnd. | Init.  | Refnd. | Init.   | Refnd. | Init.   | Refnd. | Init.   | Refnd. | Init.   | Refnd. | Init.   | Refnd. |
| AGRIBURN       | 2.5    | 0.5    | 0.0    | 0.0    | 0.1     | 0.0    | 0.3     | 0.1    | 0.1     | 0.1    | 0.1     | 0.1    | 0.1     | 0.0    |
| AIRCRAFT       | 11.7   | 22.0   | 14.0   | 21.6   | 7.3     | 10.0   | 11.1    | 19.9   | 16.0    | 27.4   | 3.7     | 5.8    | 12.2    | 20.8   |
| BIOGENIC       | 8.9    | 18.4   | 1.5    | 2.6    | 2.0     | 2.9    | 5.9     | 11.3   | 3.0     | 6.2    | 1.4     | 2.3    | 3.7     | 6.9    |
| COALCMB        | 6.6    | 12.5   | 11.3   | 18.3   | 30.6    | 40.8   | 8.4     | 14.7   | 6.9     | 13.0   | 23.7    | 32.0   | 6.2     | 11.0   |
| DIESELCMB      | 0.0    | 0.0    | 0.0    | 0.0    | 0.0     | 0.0    | 0.0     | 0.0    | 0.0     | 0.0    | 0.1     | 0.1    | 0.0     | 0.0    |
| DUST           | 15.4   | 3.2    | 11.8   | 2.0    | 7.9     | 1.1    | 13.9    | 2.7    | 14.8    | 3.1    | 8.9     | 1.4    | 15.0    | 2.8    |
| FUELOILCMB     | 6.1    | 9.9    | 1.4    | 2.2    | 7.7     | 10.5   | 3.2     | 4.8    | 2.1     | 3.4    | 7.9     | 11.1   | 1.9     | 3.2    |
| LIVESTOCK      | 0.6    | 1.2    | 4.5    | 7.8    | 2.9     | 4.1    | 4.0     | 7.5    | 2.6     | 5.1    | 4.1     | 6.5    | 6.0     | 11.1   |
| LPGCMB         | 0.0    | 0.0    | 0.0    | 0.0    | 0.0     | 0.0    | 0.0     | 0.1    | 0.0     | 0.1    | 0.2     | 0.3    | 0.0     | 0.1    |
| LWASTEBURN     | 4.2    | 0.9    | 3.9    | 0.7    | 2.6     | 0.4    | 3.9     | 0.8    | 5.1     | 1.1    | 2.4     | 0.4    | 4.4     | 0.8    |
| METALPRODUCT   | 0.2    | 0.4    | 0.2    | 0.3    | 0.8     | 0.9    | 1.3     | 1.3    | 0.3     | 0.5    | 1.5     | 1.6    | 0.4     | 0.6    |
| MEATCOOKING    | 0.0    | 0.0    | 0.1    | 0.1    | 0.1     | 0.1    | 0.1     | 0.2    | 0.1     | 0.2    | 0.3     | 0.4    | 0.1     | 0.1    |
| MEXCMB_M       | 0.0    | 0.0    | 0.0    | 0.0    | 0.1     | 0.2    | 0.1     | 0.1    | 0.0     | 0.0    | 0.1     | 0.1    | 0.0     | 0.0    |
| MINERALPRODUCT | 0.5    | 0.9    | 1.0    | 1.6    | 1.0     | 1.2    | 1.8     | 2.6    | 0.8     | 1.4    | 1.1     | 1.5    | 1.4     | 2.1    |
| NAGASCMB       | 2.4    | 2.3    | 3.8    | 3.0    | 2.7     | 1.0    | 3.8     | 1.9    | 3.4     | 2.4    | 7.2     | 4.6    | 4.0     | 1.9    |
| NRDIESEL       | 1.6    | 3.3    | 3.3    | 5.6    | 0.9     | 1.3    | 2.4     | 4.6    | 3.1     | 6.2    | 2.0     | 3.2    | 3.0     | 5.5    |
| NRFUELOIL      | 0.2    | 0.3    | 0.0    | 0.0    | 0.1     | 0.1    | 0.0     | 0.1    | 0.0     | 0.1    | 0.3     | 0.4    | 0.0     | 0.1    |
| NRGASOLINE     | 1.1    | 2.2    | 1.2    | 2.0    | 0.9     | 1.2    | 0.9     | 1.8    | 1.3     | 2.7    | 1.5     | 2.4    | 1.0     | 1.9    |
| NRLPG          | 0.0    | 0.1    | 0.0    | 0.0    | 0.0     | 0.0    | 0.0     | 0.0    | 0.0     | 0.0    | 0.2     | 0.2    | 0.1     | 0.1    |
| NRNAGAS        | 0.0    | 0.0    | 0.0    | 0.0    | 0.0     | 0.0    | 0.0     | 0.0    | 0.0     | 0.0    | 0.1     | 0.1    | 0.0     | 0.0    |
| NROTHERS       | 0.0    | 0.0    | 0.0    | 0.0    | 0.0     | 0.0    | 0.0     | 0.0    | 0.0     | 0.0    | 0.0     | 0.0    | 0.0     | 0.0    |
| OPENFIRE       | 1.8    | 0.4    | 0.4    | 0.2    | 0.8     | 0.1    | 0.4     | 0.1    | 1.4     | 0.3    | 0.7     | 0.2    | 0.5     | 0.1    |
| ORDIESEL       | 2.3    | 4.4    | 2.9    | 4.8    | 2.2     | 3.0    | 2.8     | 4.7    | 3.5     | 6.2    | 2.6     | 3.9    | 3.7     | 6.3    |
| ORGASOLINE     | 4.5    | 5.9    | 12.6   | 16.0   | 11.6    | 14.7   | 12.4    | 11.6   | 10.2    | 9.5    | 9.0     | 10.7   | 11.1    | 15.5   |
| OTHERCMB       | 2.1    | 2.0    | 0.1    | 0.1    | 0.2     | 0.3    | 0.2     | 0.4    | 0.2     | 0.4    | 1.3     | 1.9    | 0.2     | 0.3    |
| OTHERS         | 3.1    | 2.4    | 2.5    | 2.9    | 2.3     | 1.5    | 2.8     | 1.9    | 1.8     | 1.6    | 3.4     | 2.1    | 2.3     | 1.7    |
| PRESCRBURN     | 12.2   | 2.5    | 1.1    | 2.1    | 0.5     | 0.3    | 1.1     | 0.7    | 1.0     | 0.7    | 0.3     | 0.3    | 0.6     | 0.4    |
| RAILROAD       | 0.3    | 0.7    | 0.3    | 0.6    | 0.3     | 0.4    | 0.3     | 0.5    | 0.3     | 0.5    | 0.5     | 0.8    | 0.5     | 1.0    |
| SEASALT        | 0.1    | 0.1    | 0.0    | 0.0    | 0.0     | 0.0    | 0.0     | 0.0    | 0.0     | 0.0    | 0.0     | 0.0    | 0.0     | 0.0    |
| SOLVENT        | 0.2    | 0.5    | 0.7    | 1.2    | 1.1     | 1.5    | 1.1     | 2.0    | 1.4     | 2.5    | 2.2     | 3.0    | 0.9     | 1.6    |
| WILDFIRE       | 0.1    | 0.1    | 0.0    | 0.0    | 0.0     | 0.0    | 0.1     | 0.1    | 0.1     | 0.1    | 0.1     | 0.1    | 0.1     | 0.1    |
| WOODFUEL       | 0.4    | 0.6    | 0.3    | 0.6    | 0.3     | 0.5    | 0.2     | 0.3    | 0.3     | 0.6    | 0.5     | 0.6    | 0.1     | 0.2    |
| WOODSTOVE      | 10.8   | 2.2    | 20.9   | 3.6    | 13.1    | 1.9    | 17.7    | 3.4    | 20.1    | 4.2    | 12.6    | 2.0    | 20.5    | 3.8    |



**Table S10. (b) Initial and refined source impacts in percentage contributions at Chicago site**

| Category       | 1/4/04 |        | 1/19/04 |        | 1/22/04 |        | 1/25/04 |        |
|----------------|--------|--------|---------|--------|---------|--------|---------|--------|
|                | Init.  | Refnd. | Init.   | Refnd. | Init.   | Refnd. | Init.   | Refnd. |
| AGRIBURN       | 0.0    | 0.0    | 0.0     | 0.0    | 0.0     | 0.0    | 0.0     | 0.0    |
| AIRCRAFT       | 0.0    | 0.1    | 0.1     | 0.2    | 0.0     | 0.1    | 0.1     | 0.1    |
| BIOGENIC       | 0.4    | 1.1    | 0.7     | 1.7    | 0.0     | 0.1    | 0.4     | 0.8    |
| COALCMB        | 3.9    | 10.7   | 4.0     | 9.1    | 1.6     | 4.5    | 5.3     | 10.5   |
| DIESELCMB      | 0.0    | 0.0    | 0.0     | 0.1    | 0.0     | 0.0    | 0.0     | 0.1    |
| DUST           | 4.5    | 1.3    | 8.4     | 2.0    | 7.3     | 2.1    | 14.6    | 3.2    |
| FUELOILCMB     | 3.3    | 7.9    | 3.4     | 4.9    | 1.4     | 2.9    | 3.7     | 5.4    |
| LIVESTOCK      | 2.5    | 7.0    | 3.5     | 8.4    | 5.0     | 13.6   | 11.9    | 24.9   |
| LPGCMB         | 0.1    | 0.3    | 0.1     | 0.2    | 0.2     | 0.5    | 0.1     | 0.2    |
| LWASTEBURN     | 2.0    | 0.6    | 3.9     | 0.9    | 2.2     | 1.4    | 2.9     | 1.0    |
| METALPRODUCT   | 23.0   | 7.4    | 11.5    | 6.3    | 22.6    | 7.2    | 6.6     | 3.5    |
| MEATCOOKING    | 3.4    | 4.3    | 4.4     | 5.8    | 2.6     | 4.0    | 2.9     | 3.4    |
| MEXCMB_M       | 0.0    | 0.0    | 0.0     | 0.0    | 0.0     | 0.0    | 0.0     | 0.0    |
| MINERALPRODUCT | 1.8    | 3.5    | 1.4     | 2.6    | 1.4     | 2.9    | 1.2     | 1.9    |
| NAGASCMB       | 16.6   | 8.7    | 13.7    | 11.0   | 15.4    | 10.7   | 10.4    | 6.0    |
| NRDIESEL       | 2.2    | 6.2    | 3.6     | 8.5    | 1.8     | 4.9    | 3.0     | 6.1    |
| NRFUELOIL      | 0.4    | 1.0    | 0.4     | 0.9    | 0.2     | 0.6    | 0.3     | 0.6    |
| NRGASOLINE     | 1.0    | 2.8    | 2.6     | 6.1    | 0.9     | 2.5    | 2.0     | 4.2    |
| NRLPG          | 0.0    | 0.1    | 0.1     | 0.1    | 0.0     | 0.1    | 0.1     | 0.3    |
| NRNAGAS        | 0.0    | 0.0    | 0.0     | 0.0    | 0.0     | 0.0    | 0.0     | 0.0    |
| NROTHERS       | 0.0    | 0.0    | 0.0     | 0.0    | 0.0     | 0.0    | 0.0     | 0.0    |
| OPENFIRE       | 0.0    | 0.0    | 0.0     | 0.0    | 0.0     | 0.0    | 0.0     | 0.0    |
| ORDIESEL       | 1.0    | 2.8    | 1.6     | 3.7    | 0.8     | 2.2    | 2.1     | 4.2    |
| ORGASOLINE     | 5.2    | 11.5   | 7.1     | 10.6   | 7.5     | 15.7   | 8.3     | 10.9   |
| OTHERCMB       | 8.1    | 11.0   | 2.7     | 4.2    | 8.6     | 13.1   | 2.4     | 3.7    |
| OTHERS         | 9.3    | 4.0    | 10.1    | 4.1    | 7.8     | 3.8    | 10.1    | 2.6    |
| PRESCRIBURN    | 0.0    | 0.0    | 0.0     | 0.0    | 0.0     | 0.0    | 0.0     | 0.0    |
| RAILROAD       | 0.5    | 1.4    | 0.5     | 1.3    | 0.4     | 1.2    | 1.0     | 2.2    |
| SEASALT        | 0.0    | 0.0    | 0.0     | 0.0    | 0.0     | 0.0    | 0.0     | 0.0    |
| SOLVENT        | 2.2    | 3.7    | 2.1     | 3.2    | 2.1     | 2.0    | 1.7     | 1.4    |
| WILDFIRE       | 0.0    | 0.0    | 0.0     | 0.0    | 0.0     | 0.0    | 0.1     | 0.2    |
| WOODFUEL       | 0.1    | 0.3    | 0.2     | 0.5    | 0.0     | 0.1    | 0.1     | 0.2    |
| WOODSTOVE      | 8.5    | 2.4    | 13.7    | 3.3    | 10.0    | 3.7    | 8.9     | 1.9    |

**Table S10. (c) Initial and refined source impacts in percentage contributions at Detroit site**

| Category        | 1/4/04 |        | 1/7/04 |        | 1/10/04 |        | 1/13/04 |        | 1/16/04 |        | 1/19/04 |        | 1/22/04 |        | 1/25/04 |        |
|-----------------|--------|--------|--------|--------|---------|--------|---------|--------|---------|--------|---------|--------|---------|--------|---------|--------|
|                 | Init.  | Refnd. | Init.  | Refnd. | Init.   | Refnd. | Init.   | Refnd. | Init.   | Refnd. | Init.   | Refnd. | Init.   | Refnd. | Init.   | Refnd. |
| AGRIBURN        | 0.0    | 0.0    | 0.0    | 0.0    | 0.0     | 0.0    | 0.0     | 0.1    | 0.0     | 0.0    | 0.0     | 0.0    | 0.1     | 0.1    | 0.0     | 0.0    |
| AIRCRAFT        | 0.1    | 0.3    | 0.1    | 0.2    | 0.0     | 0.1    | 0.1     | 0.3    | 0.2     | 0.5    | 0.2     | 0.5    | 0.2     | 0.4    | 0.1     | 0.2    |
| BIOGENIC        | 0.6    | 1.6    | 0.9    | 1.7    | 0.1     | 0.1    | 1.0     | 2.2    | 0.0     | 0.1    | 0.4     | 1.3    | 1.3     | 2.9    | 0.6     | 1.0    |
| COALCMB         | 3.8    | 10.7   | 5.2    | 9.1    | 3.2     | 5.5    | 6.3     | 13.4   | 2.6     | 6.9    | 4.2     | 11.5   | 5.5     | 11.8   | 4.6     | 8.1    |
| DIESEL CMB      | 0.0    | 0.1    | 0.1    | 0.1    | 0.1     | 0.1    | 0.1     | 0.2    | 0.1     | 0.1    | 0.1     | 0.2    | 0.1     | 0.2    | 0.0     | 0.1    |
| DUST            | 11.4   | 3.3    | 14.9   | 2.7    | 7.7     | 1.4    | 10.5    | 2.4    | 5.7     | 1.5    | 9.3     | 2.8    | 13.5    | 3.0    | 10.3    | 1.8    |
| FUELOIL CMB     | 2.6    | 6.8    | 2.4    | 3.1    | 1.7     | 2.5    | 4.0     | 7.6    | 2.3     | 4.6    | 3.2     | 3.6    | 2.7     | 4.5    | 2.3     | 3.7    |
| LIVESTOCK       | 2.0    | 5.8    | 11.4   | 20.3   | 6.8     | 12.0   | 5.7     | 13.1   | 0.2     | 0.4    | 0.7     | 2.0    | 9.4     | 20.4   | 13.1    | 23.7   |
| LPG CMB         | 0.1    | 0.3    | 0.2    | 0.4    | 0.1     | 0.1    | 0.1     | 0.3    | 0.1     | 0.2    | 0.1     | 0.3    | 0.2     | 0.5    | 0.1     | 0.2    |
| LWASTE BURN     | 7.0    | 2.0    | 3.5    | 0.6    | 5.3     | 2.5    | 4.9     | 1.1    | 6.3     | 1.8    | 6.8     | 2.0    | 4.6     | 1.0    | 3.3     | 0.6    |
| METAL PRODUCT   | 2.3    | 5.0    | 3.6    | 4.1    | 2.5     | 3.5    | 2.4     | 2.8    | 2.0     | 4.0    | 1.9     | 4.1    | 1.7     | 2.1    | 4.6     | 3.7    |
| MEAT COOKING    | 4.1    | 1.5    | 1.8    | 3.0    | 3.2     | 5.8    | 3.1     | 3.0    | 4.7     | 6.3    | 3.8     | 3.2    | 2.5     | 1.6    | 1.8     | 1.0    |
| MEX CMB_M       | 0.0    | 0.0    | 0.0    | 0.0    | 0.0     | 0.0    | 0.0     | 0.1    | 0.0     | 0.0    | 0.0     | 0.0    | 0.1     | 0.1    | 0.0     | 0.0    |
| MINERAL PRODUCT | 0.9    | 2.1    | 1.3    | 2.1    | 1.3     | 2.1    | 0.7     | 1.2    | 0.6     | 1.5    | 0.6     | 1.7    | 0.7     | 1.4    | 0.9     | 1.4    |
| NAGAS CMB       | 12.3   | 10.7   | 9.0    | 9.4    | 9.0     | 9.6    | 11.1    | 8.0    | 15.3    | 14.3   | 13.6    | 13.9   | 10.1    | 3.9    | 7.2     | 2.6    |
| NR DIESEL       | 3.1    | 7.3    | 2.6    | 4.7    | 2.1     | 3.7    | 3.5     | 7.2    | 5.3     | 11.6   | 4.4     | 10.7   | 3.3     | 6.9    | 2.3     | 4.1    |
| NR FUELOIL      | 0.4    | 1.3    | 0.2    | 0.3    | 0.2     | 0.3    | 0.3     | 0.7    | 0.4     | 1.2    | 0.4     | 1.2    | 0.3     | 0.6    | 0.2     | 0.3    |
| NR GASOLINE     | 3.0    | 6.3    | 1.6    | 2.9    | 1.9     | 3.4    | 2.6     | 5.8    | 3.2     | 8.4    | 2.6     | 6.7    | 1.9     | 4.2    | 2.0     | 3.7    |
| NRLPG           | 0.0    | 0.1    | 0.1    | 0.2    | -0.1    | -0.2   | 0.1     | 0.2    | 0.1     | 0.2    | 0.1     | 0.3    | 0.1     | 0.3    | 0.1     | 0.1    |
| NR NAGAS        | 0.0    | 0.0    | 0.0    | 0.0    | 0.0     | 0.0    | 0.0     | 0.1    | 0.0     | 0.0    | 0.0     | 0.0    | 0.1     | 0.1    | 0.0     | 0.0    |
| NROTHERS        | 0.0    | 0.1    | 0.0    | 0.0    | 0.0     | 0.0    | 0.0     | 0.1    | 0.0     | 0.0    | 0.0     | 0.0    | 0.0     | 0.0    | 0.0     | 0.0    |
| OPEN FIRE       | 0.0    | 0.0    | 0.0    | 0.0    | 0.0     | 0.0    | 0.0     | 0.1    | 0.0     | 0.0    | 0.0     | 0.0    | 0.1     | 0.1    | 0.0     | 0.0    |
| ORDIESEL        | 3.3    | 7.5    | 2.9    | 5.3    | 2.1     | 3.8    | 3.9     | 6.9    | 5.1     | 11.0   | 4.8     | 10.2   | 3.9     | 7.9    | 2.7     | 4.8    |
| ORGASOLINE      | 3.4    | 8.0    | 8.8    | 13.7   | 17.6    | 27.4   | 7.2     | 8.0    | 4.4     | 7.7    | 3.7     | 6.0    | 6.3     | 11.2   | 16.0    | 27.0   |
| OTHER CMB       | 0.6    | 1.5    | 1.3    | 2.2    | 0.7     | 1.2    | 1.4     | 2.7    | 0.5     | 1.4    | 0.7     | 1.7    | 0.8     | 1.6    | 1.1     | 1.7    |
| OTHERS          | 3.1    | 4.1    | 6.5    | 6.1    | 6.1     | 8.3    | 4.4     | 3.4    | 2.5     | 3.3    | 2.4     | 2.7    | 4.7     | 3.6    | 6.1     | 4.1    |
| PRESCR BURN     | 0.0    | 0.0    | 0.0    | 0.0    | 0.0     | 0.0    | 0.0     | 0.1    | 0.0     | 0.0    | 0.0     | 0.0    | 0.1     | 0.1    | 0.0     | 0.0    |
| RAILROAD        | 0.3    | 0.9    | 0.8    | 1.5    | 0.2     | 0.3    | 0.4     | 0.9    | 0.2     | 0.6    | 0.3     | 0.8    | 0.5     | 1.1    | 0.3     | 0.5    |
| SEASALT         | 0.0    | 0.0    | 0.0    | 0.0    | 0.0     | 0.0    | 0.0     | 0.0    | 0.0     | 0.0    | 0.0     | 0.0    | 0.0     | 0.0    | 0.0     | 0.0    |
| SOLVENT         | 1.0    | 2.0    | 1.5    | 2.0    | 0.7     | 1.3    | 1.2     | 1.8    | 1.1     | 1.7    | 0.9     | 1.9    | 1.1     | 1.7    | 0.9     | 1.5    |
| WILDFIRE        | 0.0    | 0.0    | 0.1    | 0.1    | 0.0     | 0.0    | 0.1     | 0.1    | 0.0     | 0.0    | 0.0     | 0.0    | 0.1     | 0.2    | 0.0     | 0.1    |
| WOODFUEL        | 0.2    | 0.6    | 0.2    | 0.4    | 0.1     | 0.3    | 0.3     | 0.5    | 0.2     | 0.5    | 0.2     | 0.6    | 0.3     | 0.7    | 0.3     | 0.4    |
| WOODSTOVE       | 34.2   | 9.8    | 18.8   | 3.4    | 27.5    | 4.9    | 24.4    | 5.5    | 36.9    | 10.0   | 34.5    | 10.2   | 23.7    | 5.3    | 19.2    | 3.5    |

**Table S10. (d) Initial and refined source impacts in percentage contributions at Los Angeles site**

| Category       | 1/7/04 |        | 1/10/04 |        | 1/13/04 |        | 1/19/04 |        | 1/22/04 |        | 1/25/04 |        | 1/28/04 |        |
|----------------|--------|--------|---------|--------|---------|--------|---------|--------|---------|--------|---------|--------|---------|--------|
|                | Init.  | Refnd. | Init.   | Refnd. | Init.   | Refnd. | Init.   | Refnd. | Init.   | Refnd. | Init.   | Refnd. | Init.   | Refnd. |
| AGRIBURN       | 0.0    | 0.0    | 0.0     | 0.0    | 0.1     | 0.1    | 0.1     | 0.1    | 0.0     | 0.1    | 0.3     | 0.4    | 0.1     | 0.1    |
| AIRCRAFT       | 0.0    | 0.1    | 0.0     | 0.1    | 0.0     | 0.1    | 0.1     | 0.2    | 0.0     | 0.1    | 0.4     | 0.9    | 0.2     | 0.5    |
| BIOGENIC       | 1.4    | 4.9    | 6.7     | 19.3   | 7.0     | 15.9   | 5.0     | 12.1   | 4.3     | 8.6    | 1.2     | 2.7    | 1.8     | 4.6    |
| COALCMB        | 0.1    | 0.4    | 1.2     | 3.3    | 0.6     | 1.4    | 0.5     | 1.1    | 2.2     | 5.4    | 0.3     | 0.6    | 0.2     | 0.5    |
| DIESELCMB      | 0.0    | 0.0    | 0.0     | 0.0    | 0.0     | 0.0    | 0.0     | 0.0    | 0.0     | 0.0    | 0.2     | 0.4    | 0.1     | 0.1    |
| DUST           | 10.4   | 3.7    | 12.4    | 6.2    | 13.0    | 3.5    | 7.8     | 1.8    | 11.6    | 17.4   | 8.7     | 2.1    | 9.8     | 2.5    |
| FUELOILCMB     | 8.5    | 5.7    | 7.5     | 6.1    | 8.7     | 13.0   | 5.8     | 8.4    | 8.8     | 8.7    | 5.3     | 8.1    | 6.6     | 11.4   |
| LIVESTOCK      | 0.4    | 1.3    | 2.0     | 5.1    | 0.8     | 1.9    | 1.3     | 3.0    | 1.9     | 3.9    | 2.9     | 6.8    | 1.2     | 3.0    |
| LPGCMB         | 1.9    | 5.9    | 1.8     | 4.7    | 1.9     | 4.4    | 1.3     | 3.0    | 1.8     | 4.2    | 1.3     | 3.2    | 1.5     | 3.9    |
| LWASTEBURN     | 8.2    | 2.9    | 7.5     | 2.1    | 7.4     | 1.7    | 6.1     | 1.4    | 6.8     | 1.7    | 6.3     | 1.5    | 6.7     | 1.7    |
| METALPRODUCT   | 0.1    | 0.3    | 0.0     | 0.1    | 0.1     | 0.3    | 0.1     | 0.2    | 0.1     | 0.3    | 0.2     | 0.5    | 0.1     | 0.3    |
| MEATCOOKING    | 17.6   | 11.8   | 11.9    | 8.8    | 11.6    | 8.6    | 13.2    | 9.5    | 10.8    | 4.4    | 13.0    | 12.7   | 12.4    | 8.0    |
| MEXCMB_M       | 0.1    | 0.3    | 0.0     | 0.0    | 0.2     | 0.4    | 0.0     | 0.1    | 0.0     | 0.0    | 0.2     | 0.4    | 0.0     | 0.1    |
| MINERALPRODUCT | 2.1    | 5.2    | 1.6     | 3.9    | 1.5     | 3.2    | 1.8     | 2.5    | 2.0     | 4.3    | 1.9     | 2.3    | 2.1     | 3.8    |
| NAGASCMB       | 9.8    | 7.1    | 8.1     | 5.6    | 7.7     | 6.5    | 8.5     | 5.7    | 7.6     | 6.5    | 8.5     | 5.1    | 9.2     | 4.9    |
| NRDIESEL       | 3.9    | 12.2   | 1.4     | 3.9    | 3.2     | 7.5    | 2.7     | 6.2    | 3.0     | 7.0    | 2.8     | 6.8    | 4.5     | 11.5   |
| NRFUELOIL      | 0.0    | 0.0    | 0.0     | 0.0    | 0.0     | 0.0    | 0.1     | 0.1    | 0.0     | 0.0    | 0.5     | 1.2    | 0.3     | 0.9    |
| NRGASOLINE     | 2.0    | 6.9    | 1.3     | 3.6    | 1.1     | 2.5    | 3.5     | 8.4    | 1.0     | 2.4    | 2.0     | 4.7    | 1.6     | 4.2    |
| NRLPG          | 0.0    | -0.1   | 0.0     | 0.0    | 0.0     | 0.0    | 0.0     | 0.1    | 0.0     | 0.0    | 0.3     | 0.7    | 0.2     | 0.4    |
| NRNAGAS        | 0.0    | 0.0    | 0.0     | 0.0    | 0.0     | 0.0    | 0.0     | 0.0    | 0.0     | 0.0    | 0.2     | 0.4    | 0.1     | 0.2    |
| NROTHERS       | 0.0    | 0.0    | 0.0     | 0.0    | 0.0     | 0.0    | 0.0     | 0.0    | 0.0     | 0.0    | -0.2    | -0.4   | 0.0     | -0.1   |
| OPENFIRE       | 0.0    | 0.0    | 0.0     | 0.0    | 0.0     | 0.0    | 0.0     | 0.0    | 0.0     | 0.0    | 0.2     | 0.5    | 0.0     | 0.1    |
| ORDIESEL       | 1.3    | 3.9    | 1.0     | 2.7    | 1.3     | 2.9    | 1.3     | 2.9    | 1.2     | 2.8    | 2.0     | 4.6    | 2.1     | 5.2    |
| ORGASOLINE     | 2.3    | 4.6    | 2.4     | 5.2    | 2.2     | 4.4    | 9.2     | 13.2   | 2.8     | 4.7    | 6.9     | 10.9   | 5.9     | 12.1   |
| OTHERCMB       | 0.1    | 0.4    | 0.0     | 0.1    | 0.0     | 0.1    | 0.2     | 0.5    | 0.1     | 0.2    | 0.7     | 1.3    | 0.5     | 1.1    |
| OTHERS         | 6.9    | 9.9    | 5.3     | 8.0    | 5.1     | 8.5    | 8.2     | 6.2    | 8.4     | 7.8    | 12.2    | 9.9    | 9.7     | 9.5    |
| PRESCRBURN     | 0.1    | 0.4    | 0.6     | 1.2    | 0.5     | 5.2    | 0.2     | 0.3    | 0.4     | 0.6    | 0.3     | 0.9    | 0.2     | 0.5    |
| RAILROAD       | 0.7    | 2.3    | 0.7     | 2.0    | 0.7     | 1.6    | 0.7     | 1.5    | 0.9     | 2.3    | 0.9     | 2.1    | 1.0     | 2.6    |
| SEASALT        | 0.0    | 0.0    | 0.0     | 0.0    | 0.0     | 0.0    | 0.0     | 0.0    | 0.0     | 0.0    | 0.0     | 0.0    | 0.0     | 0.1    |
| SOLVENT        | 0.6    | 2.2    | 0.2     | 0.4    | 0.2     | 0.4    | 3.4     | 7.0    | 0.2     | 0.5    | 0.7     | 1.4    | 0.4     | 0.9    |
| WILDFIRE       | 0.0    | 0.0    | 0.0     | 0.0    | 0.0     | 0.0    | 0.0     | 0.0    | 0.0     | 0.0    | 0.2     | 1.9    | 0.0     | 0.1    |
| WOODFUEL       | 0.0    | 0.0    | 0.0     | 0.0    | 0.0     | 0.0    | 0.0     | 0.1    | 0.1     | 0.3    | 0.2     | 0.5    | 0.1     | 0.2    |
| WOODSTOVE      | 21.4   | 7.5    | 26.3    | 7.5    | 25.1    | 5.8    | 18.9    | 4.4    | 23.7    | 5.8    | 19.6    | 4.6    | 21.4    | 5.4    |

**Table S10. (e) Initial and refined source impacts in percentage contributions at New York site**

| Category       | 1/4/04 |        | 1/7/04 |        | 1/10/04 |        | 1/13/04 |        | 1/16/04 |        | 1/19/04 |        | 1/22/04 |        | 1/25/04 |        | 1/28/04 |        |     |
|----------------|--------|--------|--------|--------|---------|--------|---------|--------|---------|--------|---------|--------|---------|--------|---------|--------|---------|--------|-----|
|                | Init.  | Refnd. | Init.  | Refnd. | Init.   | Refnd. | Init.   | Refnd. | Init.   | Refnd. | Init.   | Refnd. | Init.   | Refnd. | Init.   | Refnd. | Init.   | Refnd. |     |
| AGRIBURN       | 0.2    | 0.2    | 0.0    | 0.0    | 0.0     | 0.0    | 0.1     | 0.1    | 0.0     | 0.0    | 0.0     | 0.0    | 0.0     | 0.1    | 0.0     | 0.0    | 0.0     | 0.0    | 0.0 |
| AIRCRAFT       | 0.1    | 0.3    | 0.1    | 0.1    | 0.1     | 0.1    | 0.1     | 0.1    | 0.1     | 0.1    | 0.1     | 0.2    | 0.1     | 0.2    | 0.1     | 0.2    | 0.0     | 0.0    | 0.1 |
| BIOGENIC       | 2.6    | 5.0    | 0.4    | 0.5    | 0.3     | 0.4    | 2.5     | 5.1    | 0.1     | 0.2    | 0.5     | 1.0    | 1.1     | 2.0    | 0.1     | 0.3    | 0.7     | 1.2    |     |
| COALCMB        | 16.2   | 23.3   | 13.3   | 18.7   | 6.6     | 8.9    | 11.5    | 19.2   | 10.3    | 18.9   | 11.9    | 24.3   | 13.6    | 20.4   | 9.0     | 19.9   | 15.6    | 26.1   |     |
| DIESELCMB      | 0.0    | 0.1    | 0.0    | 0.0    | 0.0     | 0.0    | 0.0     | 0.1    | 0.0     | 0.0    | 0.0     | 0.0    | 0.0     | 0.1    | 0.0     | 0.0    | 0.0     | 0.0    |     |
| DUST           | 7.6    | 1.4    | 9.2    | 1.4    | 6.4     | 3.7    | 12.9    | 2.8    | 5.6     | 1.1    | 5.3     | 1.2    | 8.8     | 1.7    | 7.4     | 1.9    | 5.5     | 1.0    |     |
| FUELOILCMB     | 10.5   | 16.7   | 10.1   | 13.0   | 12.7    | 24.2   | 8.7     | 12.1   | 13.2    | 13.6   | 12.2    | 13.9   | 9.5     | 11.5   | 14.5    | 18.5   | 12.7    | 17.7   |     |
| LIVESTOCK      | 2.6    | 5.0    | 6.4    | 9.1    | 3.4     | 4.6    | 5.5     | 11.4   | 1.2     | 2.4    | 1.8     | 3.9    | 3.8     | 7.0    | 1.2     | 2.9    | 2.2     | 3.8    |     |
| LPGCMB         | 0.1    | 0.2    | 0.2    | 0.2    | 0.1     | 0.1    | 0.1     | 0.2    | 0.1     | 0.2    | 0.2     | 0.3    | 0.2     | 0.3    | 0.1     | 0.3    | 0.1     | 0.1    |     |
| LWASTEBURN     | 1.9    | 0.4    | 1.5    | 0.2    | 0.3     | 0.2    | 2.6     | 0.6    | 0.3     | 0.2    | 0.8     | 0.2    | 2.0     | 0.8    | 0.2     | 0.1    | 1.1     | 0.2    |     |
| METALPRODUCT   | 0.9    | 1.4    | 0.9    | 1.2    | 0.1     | 0.1    | 1.5     | 2.3    | 3.2     | 6.2    | 2.5     | 5.3    | 1.1     | 1.8    | 1.1     | 2.6    | 2.9     | 4.3    |     |
| MEATCOOKING    | 6.0    | 8.6    | 5.8    | 4.6    | 8.5     | 11.3   | 6.3     | 4.0    | 9.6     | 3.4    | 8.7     | 2.0    | 6.6     | 8.4    | 13.3    | 6.2    | 7.1     | 3.8    |     |
| MEXCMB_M       | 0.0    | 0.0    | 0.0    | 0.0    | 0.0     | 0.0    | 0.0     | 0.1    | 0.0     | 0.0    | 0.0     | 0.0    | 0.0     | 0.0    | 0.0     | 0.0    | 0.0     | 0.0    |     |
| MINERALPRODUCT | 0.8    | 1.2    | 1.0    | 1.4    | 0.2     | 0.3    | 0.8     | 1.2    | 0.4     | 0.8    | 0.8     | 1.8    | 0.7     | 1.2    | 0.2     | 0.4    | 0.6     | 1.0    |     |
| NAGASCMB       | 5.5    | 4.9    | 7.2    | 5.1    | 6.2     | 6.9    | 4.5     | 3.3    | 8.0     | 11.3   | 7.9     | 5.7    | 5.7     | 5.2    | 7.8     | 5.9    | 6.1     | 2.7    |     |
| NRDIESEL       | 2.2    | 4.2    | 4.5    | 6.6    | 3.2     | 4.4    | 3.9     | 8.3    | 6.5     | 12.0   | 5.9     | 9.4    | 4.6     | 8.7    | 3.5     | 8.5    | 4.3     | 7.6    |     |
| NRFUELOIL      | 0.1    | 0.2    | 0.1    | 0.1    | 0.2     | 0.3    | 0.0     | 0.1    | 0.0     | 0.1    | 0.1     | 0.3    | 0.1     | 0.1    | 0.0     | 0.1    | 0.1     | 0.1    |     |
| NRGASOLINE     | 1.4    | 2.7    | 1.6    | 2.3    | 1.7     | 2.2    | 2.6     | 5.4    | 2.5     | 4.6    | 2.5     | 3.8    | 2.2     | 4.1    | 2.4     | 5.9    | 2.4     | 4.1    |     |
| NRLPG          | 0.1    | 0.1    | 0.2    | 0.3    | 0.1     | 0.1    | -0.1    | -0.1   | 0.1     | 0.2    | 0.1     | 0.1    | 0.0     | 0.0    | 0.0     | 0.0    | 0.0     | -0.1   |     |
| NRNAGAS        | 0.0    | 0.0    | 0.0    | 0.0    | 0.0     | 0.0    | 0.0     | 0.0    | 0.0     | 0.0    | 0.0     | 0.0    | 0.0     | 0.0    | 0.0     | 0.0    | 0.0     | 0.0    |     |
| NROTHERS       | 0.0    | 0.0    | 0.0    | 0.0    | 0.0     | 0.0    | 0.0     | 0.0    | 0.0     | 0.0    | 0.0     | 0.0    | 0.0     | 0.0    | 0.0     | 0.0    | 0.0     | 0.0    |     |
| OPENFIRE       | 7.0    | 1.3    | 4.1    | 0.6    | 7.1     | 1.6    | 5.1     | 1.1    | 7.8     | 1.6    | 6.9     | 1.6    | 5.7     | 1.5    | 9.7     | 2.4    | 5.5     | 1.0    |     |
| ORDIESEL       | 2.2    | 4.0    | 3.6    | 5.3    | 3.7     | 5.2    | 1.0     | 1.9    | 3.9     | 7.2    | 3.4     | 5.9    | 2.4     | 4.3    | 3.2     | 7.7    | 2.2     | 3.8    |     |
| ORGASOLINE     | 4.7    | 6.3    | 9.7    | 14.8   | 5.3     | 7.6    | 5.6     | 6.8    | 3.9     | 5.7    | 4.4     | 6.6    | 8.6     | 10.1   | 2.9     | 5.2    | 6.9     | 10.7   |     |
| OTHERCMB       | 0.6    | 1.0    | 0.6    | 0.9    | 0.3     | 0.4    | 0.5     | 1.0    | 0.4     | 0.7    | 0.6     | 1.2    | 0.6     | 1.1    | 0.3     | 0.7    | 0.5     | 0.8    |     |
| OTHERS         | 5.1    | 3.2    | 9.6    | 9.0    | 3.8     | 5.0    | 5.3     | 3.2    | 3.6     | 3.2    | 4.9     | 4.1    | 5.9     | 2.7    | 4.1     | 3.3    | 5.2     | 3.5    |     |
| PRESCRUBURN    | 2.4    | 1.6    | 0.0    | 0.0    | 0.0     | 0.0    | 0.5     | 0.7    | 0.0     | 0.0    | 0.0     | 0.0    | 1.5     | 0.9    | 0.0     | 0.0    | 0.0     | 0.0    |     |
| RAILROAD       | 0.3    | 0.7    | 0.5    | 0.7    | 0.2     | 0.3    | -0.5    | -1.1   | 0.1     | 0.2    | 0.1     | 0.3    | 0.3     | 0.6    | 0.2     | 0.4    | 0.0     | 0.0    |     |
| SEASALT        | 0.0    | 0.0    | 0.0    | 0.0    | 0.0     | 0.1    | 0.0     | 0.0    | 0.0     | 0.0    | 0.0     | 0.0    | 0.0     | 0.0    | 0.0     | 0.0    | 0.0     | 0.0    |     |
| SOLVENT        | 1.0    | 1.5    | 1.0    | 1.4    | 0.4     | 0.5    | 3.5     | 6.2    | 0.7     | 1.3    | 1.2     | 2.1    | 1.6     | 2.0    | 0.7     | 1.6    | 1.8     | 3.0    |     |
| WILDFIRE       | 0.1    | 0.2    | 0.0    | 0.0    | 0.0     | 0.0    | 0.1     | 0.1    | 0.0     | 0.0    | 0.0     | 0.0    | 0.1     | 0.1    | 0.0     | 0.0    | 0.0     | 0.0    |     |
| WOODFUEL       | 0.5    | 0.9    | 0.2    | 0.4    | 0.2     | 0.3    | 0.3     | 0.6    | 0.5     | 0.9    | 0.3     | 0.7    | 0.3     | 0.5    | 0.3     | 0.7    | 0.3     | 0.4    |     |
| WOODSTOVE      | 17.0   | 3.3    | 8.1    | 1.8    | 28.9    | 11.0   | 15.0    | 3.2    | 18.0    | 3.7    | 16.8    | 3.8    | 12.7    | 2.6    | 17.5    | 4.4    | 16.3    | 2.8    |     |

**Table S10. (f) Initial and refined source impacts in percentage contributions at Pittsburgh site**

| Category       | 1/4/04 |        | 1/7/04 |        | 1/10/04 |        | 1/13/04 |        | 1/19/04 |        | 1/22/04 |        | 1/25/04 |        | 1/28/04 |        |
|----------------|--------|--------|--------|--------|---------|--------|---------|--------|---------|--------|---------|--------|---------|--------|---------|--------|
|                | Init.  | Refnd. | Init.  | Refnd. | Init.   | Refnd. | Init.   | Refnd. | Init.   | Refnd. | Init.   | Refnd. | Init.   | Refnd. | Init.   | Refnd. |
| AGRIBURN       | 0.0    | 0.0    | 0.0    | 0.0    | 0.0     | 0.0    | 0.1     | 0.1    | 0.0     | 0.0    | 0.1     | 0.1    | 0.0     | 0.0    | 0.0     | 0.0    |
| AIRCRAFT       | 0.1    | 0.3    | 0.1    | 0.1    | 0.2     | 0.3    | 0.1     | 0.2    | 0.2     | 0.3    | 0.2     | 0.3    | 0.2     | 0.4    | 0.1     | 0.1    |
| BIOGENIC       | 1.5    | 1.5    | 1.2    | 1.5    | 0.1     | 0.2    | 2.3     | 4.1    | 0.7     | 1.4    | 1.3     | 2.3    | 0.1     | 0.3    | 0.9     | 1.4    |
| COALCMB        | 5.5    | 13.2   | 10.0   | 12.8   | 21.3    | 29.3   | 9.5     | 14.2   | 12.6    | 22.9   | 12.5    | 19.8   | 13.3    | 20.3   | 16.8    | 24.1   |
| DIESELCMB      | 0.1    | 0.2    | 0.0    | 0.0    | 0.0     | 0.0    | 0.0     | 0.1    | 0.0     | 0.0    | 0.0     | 0.1    | 0.1     | 0.1    | 0.0     | 0.0    |
| DUST           | 10.2   | 2.7    | 14.7   | 1.9    | 4.2     | 0.6    | 18.4    | 3.4    | 10.2    | 2.0    | 12.3    | 2.2    | 8.0     | 1.5    | 13.2    | 2.0    |
| FUELOILCMB     | 1.7    | 3.8    | 0.9    | 1.3    | 5.6     | 4.4    | 3.0     | 5.1    | 2.5     | 4.3    | 2.4     | 3.9    | 2.3     | 3.7    | 4.3     | 6.4    |
| LIVESTOCK      | 6.0    | 15.6   | 18.4   | 25.1   | 1.9     | 2.8    | 12.2    | 22.2   | 4.4     | 8.7    | 8.7     | 15.9   | 5.2     | 9.8    | 14.2    | 22.3   |
| LPGCMB         | 0.1    | 0.4    | 0.1    | 0.1    | 0.0     | 0.1    | 0.1     | 0.2    | 0.1     | 0.1    | 0.2     | 0.3    | 0.1     | 0.1    | 0.1     | 0.1    |
| LWASTEBURN     | 11.9   | 3.1    | 5.4    | 0.8    | 10.7    | 1.6    | 5.3     | 1.0    | 10.0    | 2.0    | 8.4     | 1.5    | 12.3    | 2.4    | 4.4     | 0.7    |
| METALPRODUCT   | 5.0    | 8.0    | 4.8    | 5.0    | 5.0     | 6.1    | 4.0     | 3.5    | 5.5     | 3.7    | 5.3     | 4.1    | 5.8     | 5.6    | 5.9     | 4.1    |
| MEATCOOKING    | 3.9    | 1.0    | 1.6    | 2.0    | 3.8     | 5.4    | 1.5     | 1.8    | 3.2     | 2.2    | 2.5     | 2.7    | 4.0     | 5.2    | 1.2     | 1.2    |
| MEXCMB_M       | 0.0    | 0.0    | 0.0    | 0.0    | 0.0     | 0.0    | 0.0     | 0.1    | 0.0     | 0.0    | 0.0     | 0.0    | 0.0     | 0.0    | 0.0     | 0.0    |
| MINERALPRODUCT | 2.7    | 5.7    | 1.0    | 1.3    | 1.7     | 2.3    | 1.4     | 1.6    | 2.0     | 3.0    | 1.5     | 2.2    | 2.9     | 3.8    | 1.2     | 1.6    |
| NAGASCMB       | 5.1    | 3.1    | 3.2    | 3.5    | 4.5     | 4.7    | 4.6     | 3.8    | 5.4     | 2.9    | 4.8     | 3.4    | 5.6     | 5.4    | 4.0     | 2.5    |
| NRDIESEL       | 5.1    | 4.7    | 2.7    | 3.6    | 5.2     | 7.6    | 2.4     | 4.3    | 4.7     | 8.9    | 4.4     | 7.5    | 5.6     | 10.3   | 1.9     | 2.9    |
| NRFUELOIL      | 0.9    | 1.8    | 0.2    | 0.3    | 1.1     | 1.5    | 0.2     | 0.4    | 0.8     | 1.5    | 0.7     | 1.3    | 1.3     | 2.5    | 0.3     | 0.4    |
| NRGASOLINE     | 1.7    | 1.7    | 0.7    | 1.0    | 1.8     | 2.7    | 1.2     | 2.1    | 1.7     | 3.3    | 1.4     | 2.6    | 1.6     | 3.0    | 2.0     | 3.0    |
| NRLPG          | 0.1    | 0.1    | 0.0    | 0.1    | 0.0     | 0.1    | 0.1     | 0.1    | 0.0     | 0.1    | 0.1     | 0.1    | 0.1     | 0.1    | 0.1     | 0.1    |
| NRNAGAS        | 0.0    | 0.0    | 0.0    | 0.0    | 0.0     | 0.0    | 0.0     | 0.0    | 0.0     | 0.0    | 0.0     | 0.1    | 0.0     | 0.0    | 0.0     | 0.0    |
| NROTHERS       | 0.0    | 0.0    | 0.0    | 0.0    | 0.0     | 0.0    | 0.0     | 0.0    | 0.0     | 0.0    | 0.0     | 0.0    | 0.0     | 0.0    | 0.0     | 0.0    |
| OPENFIRE       | 0.0    | 0.0    | 0.1    | 0.1    | 0.2     | 0.2    | 0.2     | 0.2    | 0.2     | 0.1    | 0.9     | 0.2    | 0.2     | 0.2    | 0.1     | 0.1    |
| ORDIESEL       | 1.6    | 2.7    | 1.5    | 2.0    | 2.3     | 3.4    | 1.6     | 2.7    | 2.0     | 3.8    | 2.1     | 3.7    | 2.8     | 5.2    | 1.4     | 2.1    |
| ORGASOLINE     | 6.6    | 12.5   | 12.1   | 16.8   | 9.0     | 12.4   | 11.1    | 15.6   | 8.7     | 15.1   | 8.3     | 13.8   | 7.1     | 10.4   | 8.8     | 13.8   |
| OTHERCMB       | 0.5    | 1.1    | 0.8    | 1.1    | 0.6     | 0.8    | 0.8     | 1.3    | 0.7     | 1.1    | 0.8     | 1.2    | 0.2     | 0.4    | 1.0     | 1.3    |
| OTHERS         | 13.5   | 11.0   | 9.9    | 13.6   | 4.5     | 5.2    | 7.8     | 6.0    | 7.8     | 7.2    | 5.9     | 4.9    | 5.8     | 4.9    | 6.4     | 5.4    |
| PRESCRBURN     | 0.0    | 0.0    | 0.0    | 0.0    | 0.0     | 0.0    | 0.1     | 0.1    | 0.0     | 0.0    | 0.1     | 0.2    | 0.1     | 0.2    | 0.0     | 0.0    |
| RAILROAD       | 0.4    | 1.0    | 0.4    | 0.6    | 0.3     | 0.5    | 0.7     | 1.2    | 0.4     | 0.7    | 0.5     | 0.9    | 0.4     | 0.8    | 0.2     | 0.4    |
| SEASALT        | 0.0    | 0.0    | 0.0    | 0.0    | 0.0     | 0.0    | 0.0     | 0.0    | 0.0     | 0.0    | 0.0     | 0.0    | 0.0     | 0.0    | 0.0     | 0.0    |
| SOLVENT        | 0.3    | 0.7    | 1.1    | 1.5    | 0.5     | 0.7    | 1.3     | 2.0    | 0.7     | 1.3    | 1.3     | 1.9    | 0.3     | 0.6    | 1.2     | 1.8    |
| WILDFIRE       | 0.0    | 0.0    | 0.1    | 0.1    | 0.0     | 0.0    | 0.1     | 0.2    | 0.0     | 0.0    | 0.1     | 0.1    | 0.0     | 0.0    | 0.0     | 0.1    |
| WOODFUEL       | 0.1    | 0.2    | 0.2    | 0.2    | 0.1     | 0.1    | 0.1     | 0.2    | 0.1     | 0.2    | 0.2     | 0.3    | 0.0     | 0.1    | 0.3     | 0.5    |
| WOODSTOVE      | 15.0   | 3.9    | 8.9    | 3.5    | 15.4    | 6.8    | 9.7     | 2.2    | 15.5    | 3.1    | 13.0    | 2.3    | 14.5    | 2.8    | 9.8     | 1.5    |

**Table S11.** Initial and refined source impacts (%) regrouped to 9 sources and compared with CAMx/PSAT results (Burr and Zhang 2011b)

| Category*     | Atlanta |        |             | Chicago |        |           | New York |        |           |
|---------------|---------|--------|-------------|---------|--------|-----------|----------|--------|-----------|
|               | Init.   | Refnd. | CAMx/PSAT** | Init.   | Refnd. | CAMx/PSAT | Init.    | Refnd. | CAMx/PSAT |
| Biogenic      | 4.3     | 7.8    | 4.2         | 0.3     | 0.9    | 1.3       | 1.4      | 2.7    | 0.9       |
| Biomass       | 24.9    | 5.5    | 20.8        | 13.0    | 4.1    | 8.0       | 25.4     | 6.8    | 15.4      |
| Coal          | 11.8    | 19.8   | 18.7        | 3.7     | 8.6    | 9.1       | 12.9     | 20.8   | 13.0      |
| Diesel        | 5.3     | 9.0    | 10.4        | 4.0     | 9.6    | 10.9      | 6.3      | 11.7   | 10.3      |
| Gas           | 11.3    | 13.9   | 13.6        | 8.9     | 16.1   | 13.6      | 7.9      | 11.9   | 12.9      |
| Industrial    | 2.9     | 4.3    | 7.1         | 18.6    | 10.5   | 19.8      | 3.8      | 6.2    | 10.9      |
| Misc. & Waste | 6.1     | 8.3    | 4.3         | 19.0    | 23.6   | 9.1       | 16.0     | 16.2   | 8.4       |
| Other Comb.   | 8.4     | 9.4    | 16.6        | 22.0    | 21.5   | 14.6      | 17.6     | 21.3   | 23.2      |
| Other Mob.    | 25.0    | 22.0   | 4.2         | 10.5    | 5.0    | 13.6      | 8.7      | 2.4    | 5.0       |

\* Category definitions can be found in Table 2 of Burr and Zhang (2011a). \*\*At the JST SEARCH site. Note that the CAMx/PSAT results are averages for January 2002.

**Table S12.** January 2004 average initial and refined source impacts on PM<sub>2.5</sub> at the six sites: regrouped to 13 sources

| Category (each includes both primary and secondary impacts) | Atlanta |      |        |      | Chicago |      |        |      | Detroit |      |        |      | Los Angeles |      |        |      | New York |      |        |      | Pittsburgh |      |        |      |
|-------------------------------------------------------------|---------|------|--------|------|---------|------|--------|------|---------|------|--------|------|-------------|------|--------|------|----------|------|--------|------|------------|------|--------|------|
|                                                             | Init.   |      | Refnd. |      | Init.   |      | Refnd. |      | Init.   |      | Refnd. |      | Init.       |      | Refnd. |      | Init.    |      | Refnd. |      | Init.      |      | Refnd. |      |
|                                                             | %       | Rank | %      | Rank | %       | Rank | %      | Rank | %       | Rank | %      | Rank | %           | Rank | %      | Rank | %        | Rank | %      | Rank | %          | Rank | %      | Rank |
| LDGV <sup>†</sup>                                           | 11.3    | 6    | 13.9   | 4    | 8.9     | 6    | 16.2   | 2    | 10.2    | 4    | 19.0   | 2    | 7.8         | 6    | 15.5   | 2    | 7.9      | 6    | 11.9   | 5    | 10.6       | 5    | 16.6   | 3    |
| HDDV <sup>†</sup>                                           | 5.6     | 7    | 9.7    | 5    | 4.7     | 7    | 11.4   | 3    | 7.6     | 6    | 15.1   | 3    | 5.4         | 8    | 13.5   | 3    | 6.5      | 8    | 12.0   | 4    | 6.3        | 6    | 10.4   | 4    |
| DUST                                                        | 13.2    | 2    | 2.4    | 8    | 9.5     | 5    | 2.4    | 11   | 10.2    | 5    | 2.3    | 10   | 9.8         | 4    | 3.3    | 9    | 8.4      | 5    | 1.8    | 10   | 12.3       | 4    | 2.2    | 11   |
| BURN <sup>†</sup>                                           | 24.9    | 1    | 5.5    | 7    | 13.0    | 4    | 4.2    | 9    | 33.8    | 1    | 8.6    | 6    | 28.7        | 1    | 9.0    | 5    | 25.4     | 1    | 6.8    | 6    | 21.1       | 1    | 5.1    | 5    |
| COALCMB                                                     | 11.8    | 4    | 19.8   | 1    | 3.7     | 8    | 8.7    | 4    | 4.4     | 7    | 9.7    | 4    | 0.5         | 10   | 1.2    | 10   | 12.9     | 2    | 20.9   | 1    | 12.7       | 3    | 19.8   | 2    |
| MEATCOOKING                                                 | 0.1     | 12   | 0.1    | 12   | 3.2     | 9    | 4.2    | 8    | 3.3     | 8    | 3.3    | 9    | 13.6        | 3    | 9.8    | 4    | 7.4      | 7    | 6.3    | 7    | 2.6        | 10   | 2.8    | 9    |
| SEASALT                                                     | 0.0     | 13   | 0.0    | 13   | 0.0     | 13   | 0.0    | 13   | 0.0     | 13   | 0.0    | 13   | 0.0         | 13   | 0.0    | 13   | 0.0      | 13   | 0.0    | 13   | 0.0        | 13   | 0.0    | 13   |
| METALPRODUCT                                                | 0.7     | 11   | 0.8    | 11   | 15.2    | 2    | 5.7    | 6    | 2.5     | 10   | 3.7    | 8    | 0.1         | 11   | 0.3    | 12   | 1.5      | 10   | 2.5    | 9    | 5.1        | 7    | 4.6    | 6    |
| MINERALPRODUCT                                              | 1.1     | 10   | 1.7    | 10   | 1.4     | 11   | 2.6    | 10   | 0.8     | 11   | 1.7    | 11   | 1.9         | 9    | 3.3    | 8    | 0.7      | 11   | 1.1    | 11   | 1.8        | 11   | 2.4    | 10   |
| NATURALGAS <sup>†</sup>                                     | 3.7     | 9    | 2.2    | 9    | 13.6    | 3    | 8.7    | 5    | 11.3    | 3    | 9.1    | 5    | 8.7         | 5    | 5.9    | 7    | 6.1      | 9    | 5.1    | 8    | 4.8        | 8    | 3.8    | 8    |
| FUELOIL <sup>†</sup>                                        | 4.2     | 8    | 6.4    | 6    | 3.1     | 10   | 5.1    | 7    | 3.0     | 9    | 4.7    | 7    | 7.1         | 7    | 8.7    | 6    | 11.0     | 4    | 15.0   | 3    | 3.6        | 9    | 4.4    | 7    |
| AIRCRAFT                                                    | 11.4    | 5    | 18.7   | 2    | 0.0     | 12   | 0.1    | 12   | 0.1     | 12   | 0.3    | 12   | 0.1         | 12   | 0.3    | 11   | 0.1      | 12   | 0.2    | 12   | 0.1        | 12   | 0.3    | 13   |
| AllOthers <sup>†</sup>                                      | 12.0    | 3    | 18.6   | 3    | 23.7    | 1    | 30.7   | 1    | 12.6    | 2    | 22.6   | 1    | 16.4        | 2    | 29.2   | 1    | 12.2     | 3    | 16.4   | 2    | 19.2       | 2    | 27.6   | 1    |

<sup>†</sup> Regrouped sources: LDGV – light-duty gasoline vehicles, merged from NRGASOLINE and ORGASOLINE; HDDV – heavy-duty diesel vehicles, merged from NRDIESEL, ORDIESEL, RAILROAD and DIESEL CMB; BURN – vegetative burning, merged from AGRIBURN, LWASTEBURN, OPENFIRE, PRESCRBU, WILDFIRE, WOODFUEL and WOODSTOVE; NATURALGAS – merged from NAGASCMB and NRNAGAS; FUELOIL – merged from FUELOILC and NRFUELOI; AllOthers – merged from the leftover hybrid sources: BIOGENIC, LIVESTOCK, LPGCMB, MEXCMB\_M, NRLPG, NROTHERS, OTHERCMB, OTHERS and SOLVENT.

**Table S13. Diesel versus gasoline vehicle impacts at the six sites**

| <b>Diesel/gasoline ratios</b>                                              | Atlanta | Chicago | Detroit | Los Angeles | New York | Pittsburgh |
|----------------------------------------------------------------------------|---------|---------|---------|-------------|----------|------------|
| Refined source impacts (primary only)                                      | 2.61    | 2.19    | 1.97    | 2.0         | 2.17     | 2.2        |
| PM <sub>2.5</sub> Emissions                                                | 2.57    | 1.67    | 2.14    | 1.87        | 1.97     | 3.58       |
| Source impacts from the chosen RM study                                    | 0.43    | -       | 0.28    | 3.0         | -        | 0.49       |
| Refined source impacts (primary and secondary combined)                    | 0.69    | 0.70    | 0.79    | 0.87        | 1.01     | 0.63       |
| <b>Total vehicle impacts (diesel and gasoline combined, in percentage)</b> |         |         |         |             |          |            |
| Refined source impacts (primary only)                                      | 14.1    | 13.4    | 21.1    | 18.0        | 19.0     | 14.4       |
| Source impacts from the chosen RM study                                    | 19.6    | 31      | 19.2    | 14.8        | 15.5     | 14.2       |
| Refined source impacts (primary and secondary combined)                    | 23.6    | 27.6    | 34.1    | 29.0        | 23.9     | 27.0       |

**Table S14. Primary versus secondary impacts at the six sites**

| <b>Refined source impacts (in percentage)</b>                  | Atlanta | Chicago | Detroit | Los Angeles | New York | Pittsburgh |
|----------------------------------------------------------------|---------|---------|---------|-------------|----------|------------|
| Primary                                                        | 53.5    | 49.1    | 54.9    | 64.1        | 60.9     | 47.9       |
| Secondary                                                      | 46.5    | 50.9    | 45.1    | 35.9        | 39.1     | 52.1       |
| <b>Source impacts from the chosen RM study (in percentage)</b> |         |         |         |             |          |            |
| Primary                                                        | 31.9    | 49      | 40.9    | 36.3        | 41.7     | 42.3       |
| Secondary                                                      | 68.1    | 51      | 59.1    | 63.7        | 58.3     | 57.7       |

**Table S15. Contribution to secondary species with refined source impacts results regrouped to 13 sources**

| Metro area (site ID)          | Atlanta (130890002) |     | Chicago (170310076) |     | Detroit (261630001) |     | Los Angeles (060658001) |     | New York (360050083) |     | Pittsburgh (420030008) |     |
|-------------------------------|---------------------|-----|---------------------|-----|---------------------|-----|-------------------------|-----|----------------------|-----|------------------------|-----|
| Contribution (%) <sup>a</sup> | SOC                 | SO4 | SOC                 | SO4 | SOC                 | SO4 | SOC                     | SO4 | SOC                  | SO4 | SOC                    | SO4 |
| LDGV                          | 1                   | 1   | 28                  | 2   | 20                  | 2   | 3                       | 7   | 11                   | 1   | 19                     | 1   |
| HDDV                          |                     |     |                     | 1   |                     | 3   |                         | 12  |                      |     |                        |     |
| DUST                          |                     |     |                     |     |                     |     |                         |     |                      |     | 4                      |     |
| BURN                          | 1                   | 1   | 3                   | 1   | 3                   | 2   |                         | 10  | 7                    | 1   |                        | 1   |
| COALCMB                       |                     | 61  |                     | 39  |                     | 43  |                         | 7   |                      | 43  |                        | 56  |
| MEATCOOKING                   |                     |     |                     |     |                     |     |                         | 1   |                      |     |                        |     |
| SEASALT                       |                     |     |                     |     |                     |     |                         |     |                      |     |                        | 7   |
| METALPRODUCT                  |                     | 1   |                     | 10  |                     | 8   |                         | 2   |                      | 6   |                        | 3   |
| MINERALPRODUCT                |                     | 1   |                     | 5   |                     | 3   |                         | 6   |                      | 1   |                        | 4   |
| NATURALGAS                    |                     | 3   |                     | 10  |                     | 10  |                         | 11  |                      | 5   |                        | 4   |
| FUELOIL                       |                     | 23  |                     | 20  |                     | 20  |                         | 26  |                      | 36  |                        | 21  |
| AIRCRAFT                      |                     | 3   |                     |     |                     |     |                         | 2   |                      |     |                        |     |
| AllOthers                     | 98                  | 6   | 69                  | 11  | 77                  | 9   | 96                      | 17  | 82                   | 5   | 77                     | 6   |

<sup>a</sup>Note that less than 0.5% contributions are not shown in the table.

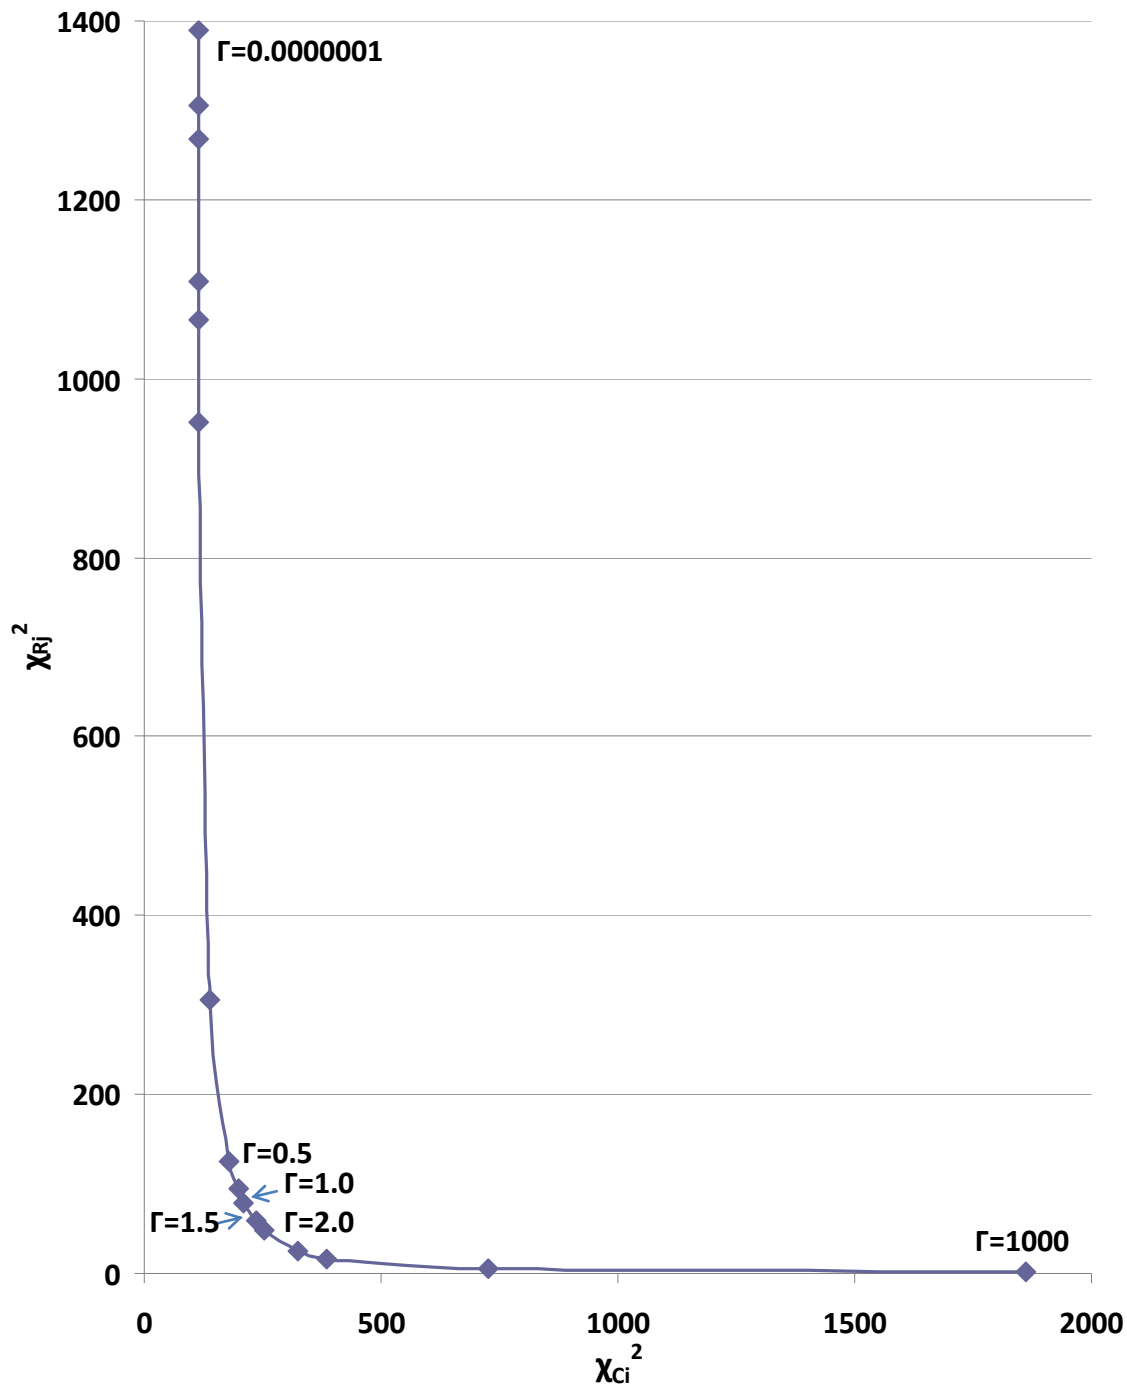

**Fig. S1.** L-curve plot: objective function terms  $\chi_{Rj}^2$  versus  $\chi_{Ci}^2$  at different  $\Gamma$  values, calculated using the case of January 4, 2004 at the Atlanta CSN site.



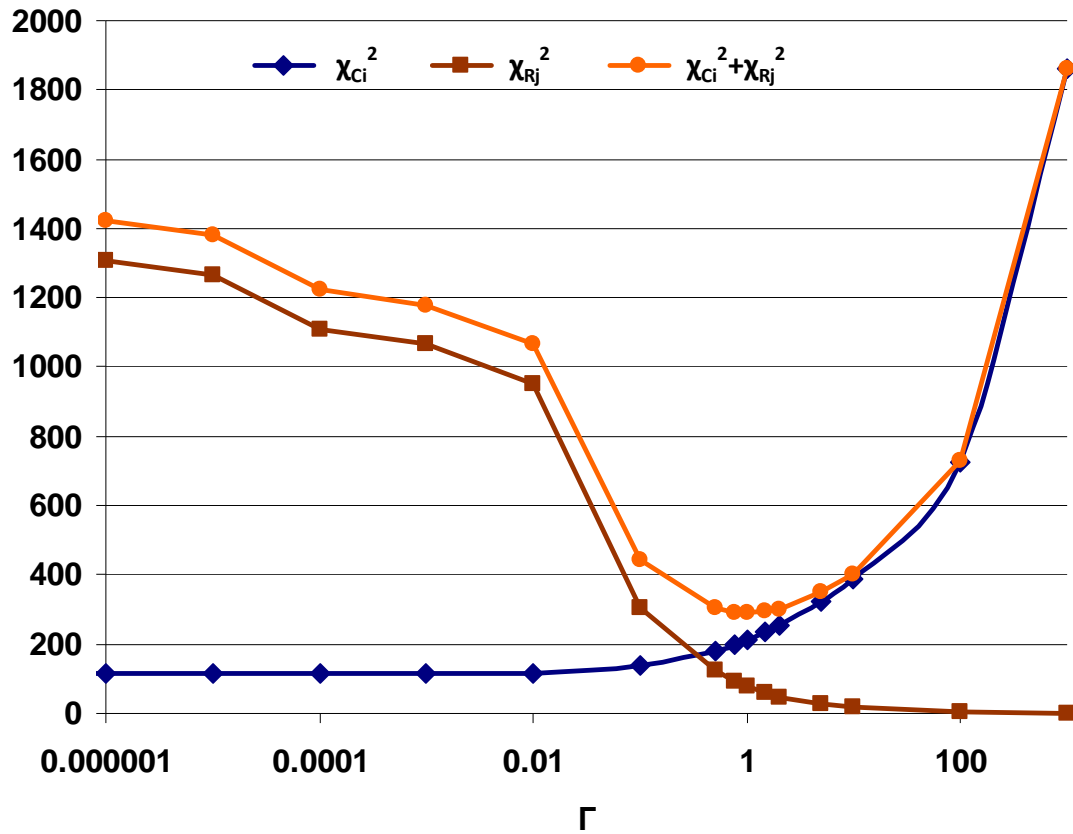

**Fig. S2.** Objective function terms  $\chi_{Ci}^2$ ,  $\chi_{Rj}^2$  and  $\chi_{Ci}^2 + \chi_{Rj}^2$  against different  $\Gamma$  values calculated using the case of January 4, 2004 at the Atlanta CSN site.

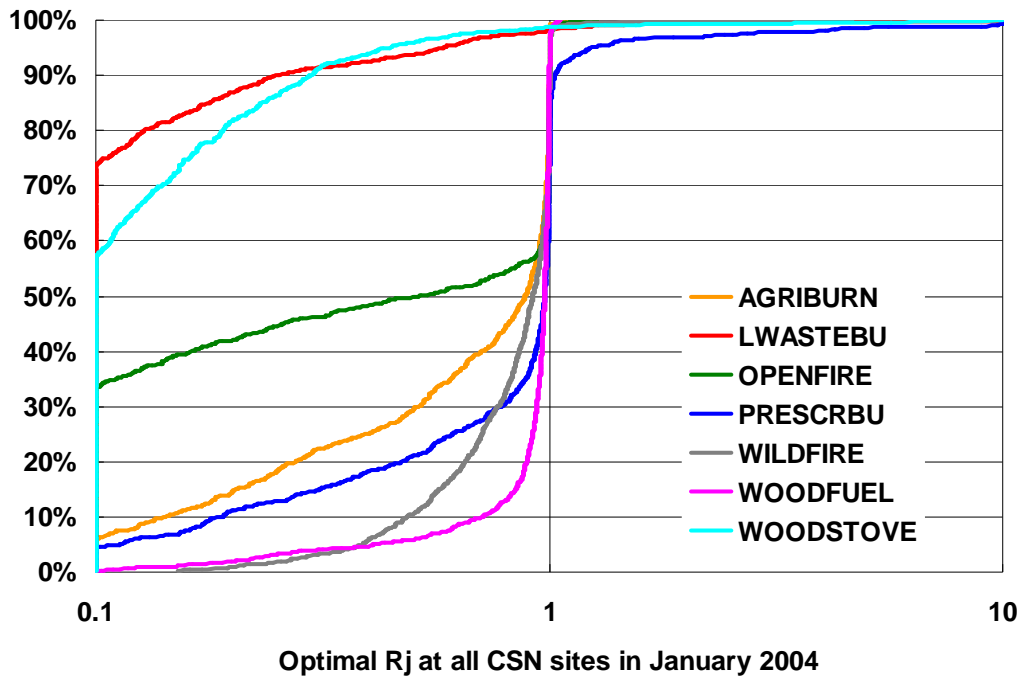

(a)

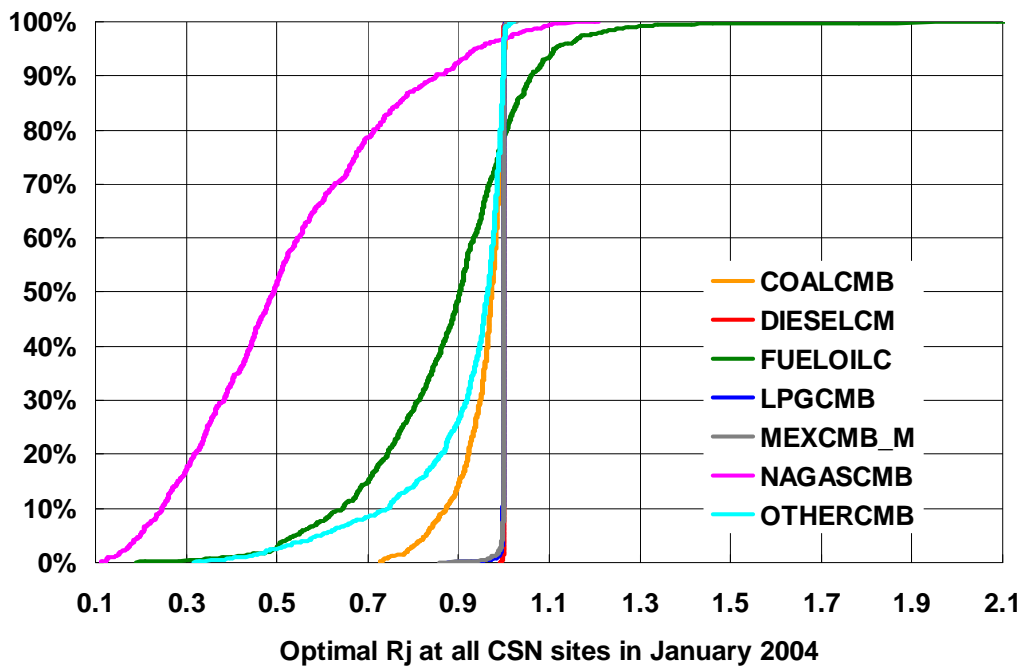

(b)

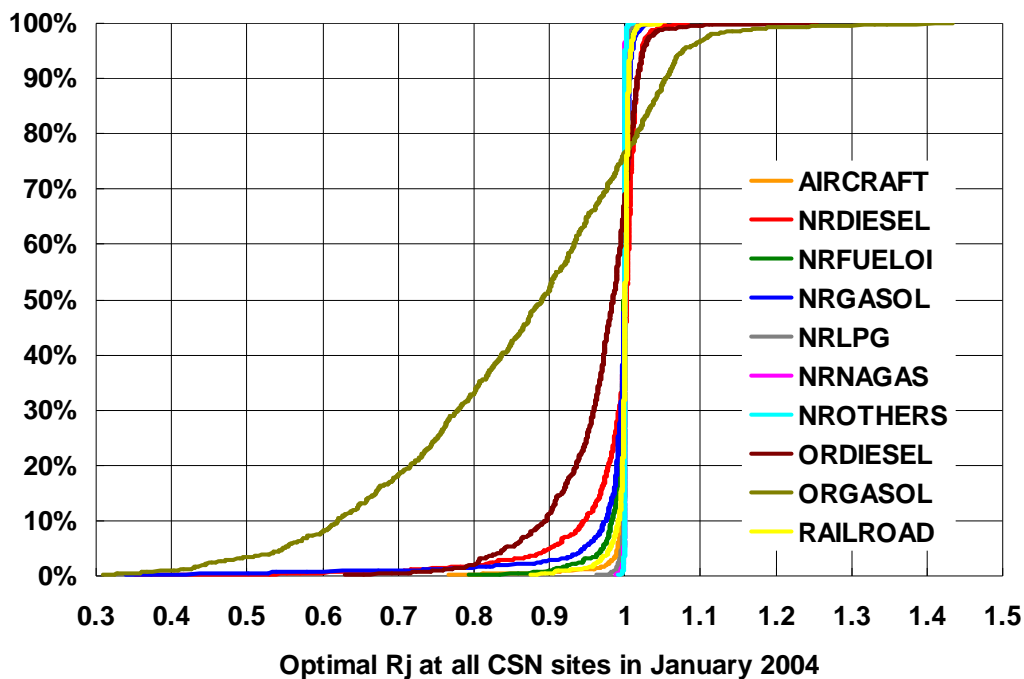

(c)

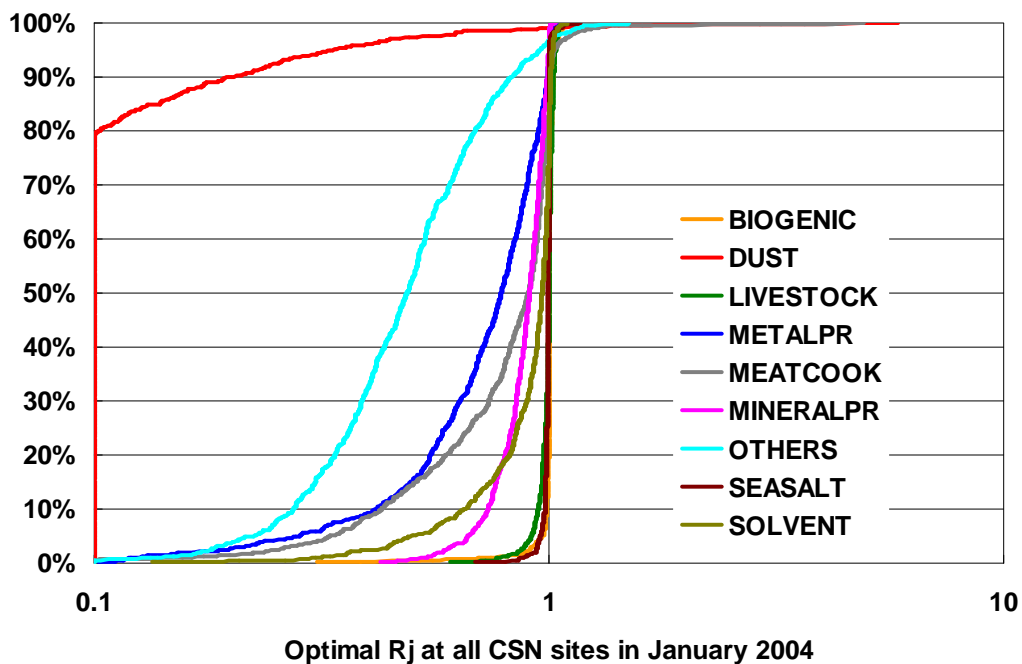

(d)

**Fig. S3.** Cumulative distribution functions of calculated  $R_j$  across 164 CSN sites with valid measurements in January 2004, with source categories grouped by top tier sectors: (a) Biomass-burning, (b) Combustion, (c) Non-road and On-road, and (d) Industrial and Others.

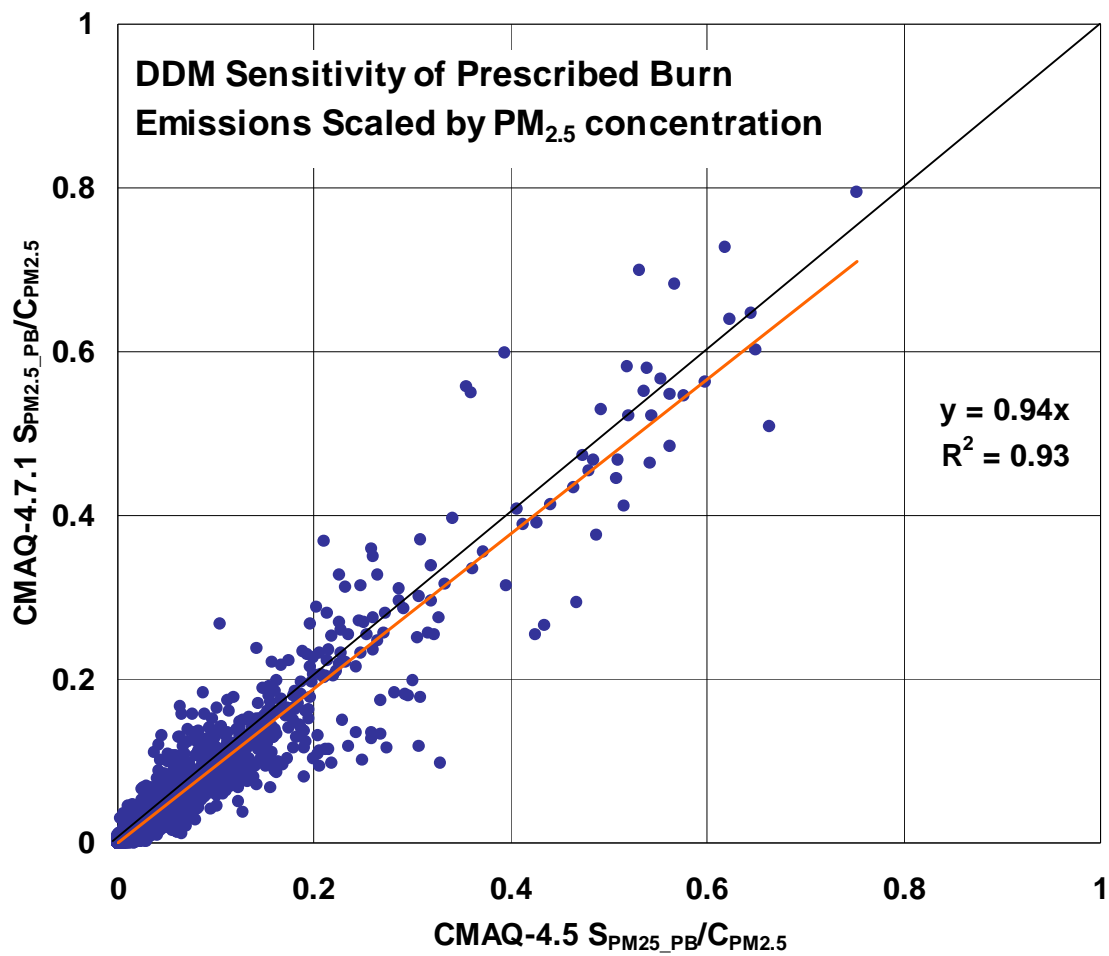

**Fig. S4.** CMAQ modeling results using different versions: CMAQv4.5 versus CMAQv4.7.1 for DDM sensitivity of prescribed burn emissions to PM<sub>2.5</sub> concentration ( $S_{PM2.5\_PB}$ ) scaled by simulated PM<sub>2.5</sub> concentration ( $C_{PM2.5}$ ) at CSN sites.
